# Supplementary material for: Climate, cryosphere and carbon cycle controls on Southeast Atlantic orbital-scale carbonate deposition since the Oligocene (30–0 Ma)
Source: Copernicus journal article supplement (doi:10.5194/cp-17-2091-2021), 2021-10-15
Supplement: Supplementary file 1 [file Drury et al., Site 1264 CaCO3 - Supplementary Information.pdf › Final supplementary information Drury et al 1264 CaCO3/Drury et al., Site 1264 CaCO3 - Supplementary Information.pdf]

This supplemental file contains a description of the intercalibration process used to integrate the X-ray fluorescence (XRF) datasets collected at different times. It also includes Supplementary Figures S1-S11 and Table S6. All Supplementary Tables S1-S7 (including Table S6) are available as individual excel files within the supplementary zip file. All Supplementary Tables (S1-S7) are also stored on the open access PANGAEA database (<https://doi.pangaea.de/10.1594/PANGAEA.919489>). All composite line scan and core box core and splice are available as supplementary information on PANGAEA, and on [www.codd-home.net](http://www.codd-home.net). All Supplementary Figures (S1-S11) and Supplementary Tables (S1-S7) are referred to in the main manuscript. All references cited here are included in the main manuscript's reference list.

## **Overview of Supplementary Tables, Figures and Core Images (*\*archived on PANGAEA*)**

### ***Supplementary figures:***

- SI Figures S1)** XRF intercalibration of the four measurement campaigns
- SI Figures S2)** Downcore intercalibrated XRF data from Site 1264: ln(Ca/Fe), Si, Fe, K, Ti, and Mn
- SI Figures S3)** Splice panels for entire interval showing revisions.
- SI Figures S4)** Revisions to the offsplice mapping pairs of Core 1264A-29H
- SI Figures S5)** Generation of the composite core image of ODP Sites 1264 and 1265.
- SI Figures S6)** Calibration of ln(Ca/Fe) to shipboard CaCO<sub>3</sub>
- SI Figures S7)** Calculation of bulk and CaCO<sub>3</sub> MARs
- SI Figures S8)** Polynomial fit through selected (i.e. high-quality) Site 1264 bio/magnetostratigraphic events
- SI Figures S9)** Spectral analysis of %CaCO<sub>3</sub> on the polynomial age model
- SI Figures S10)** Oversized panels showing depth to age tie points and age model generation
- SI Figures S11)** Antiphase relationship between benthic  $\delta^{18}\text{O}$  and %CaCO<sub>3</sub>

### ***Supplementary tables:***

- SI Table S1)** Site 1264 XRF and Site 1264-1265 CaCO<sub>3</sub> data, including sedimentation rates and all MARs.  
The uncalibrated 1264 datasets and full Site 1265 CaCO<sub>3</sub> data are also included\*
- SI Table S2)** Offsets/affine tables for 1264\*
- SI Table S3)** Splice tie table for 1264\*
- SI Table S4)** Mapping tables for 1264\*
- SI Table S5)** 1264-1265 correlation to accommodate splice revisions\*
- SI Table S6)** Selected (i.e. high-quality) bio- and magnetostratigraphic events for Site 1264\*
- SI Table S7)** New astrochronology (with sedimentation rates) for Site 1264\*

### ***Other Supplementary information (on PANGAEA and www.CODD-home.net):***

- Other SI S1)** Site 1264 composite line scan core and splice images compiled from line scan images\*
- Other SI S2)** Site 1264 composite line scan core and splice images compiled from core box images\*

## 1.1. Intercalibration of XRF Core Scanning Data

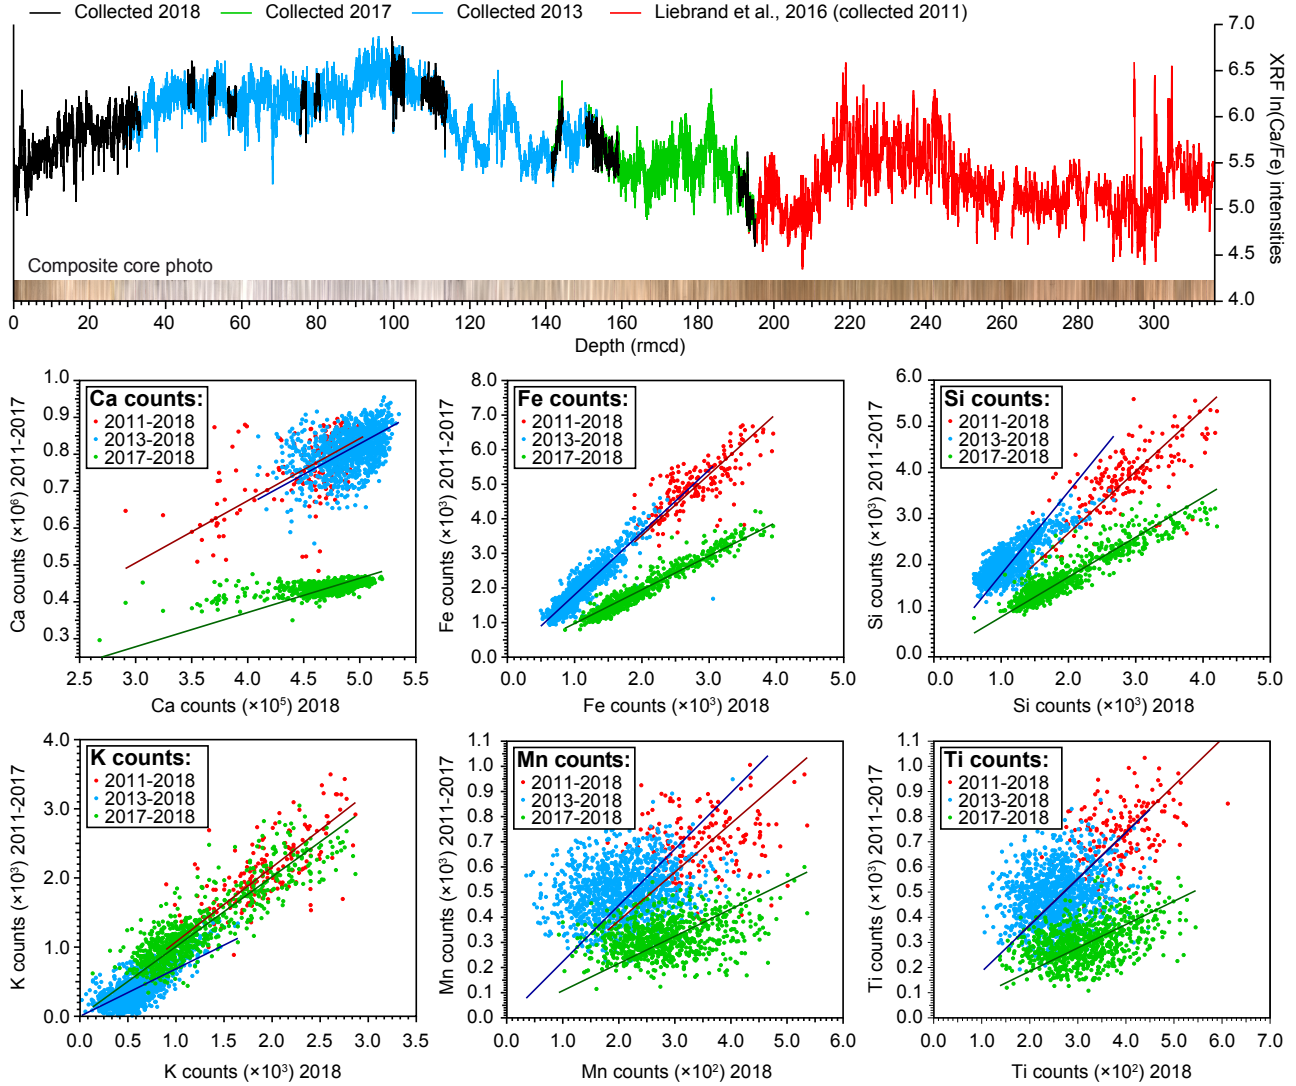

**Supplementary Figure S1:** XRF intercalibration to account for measurement differences over time.

The X-Ray Fluorescence (XRF) core scanning data was collected in 2011 (195.12-205 rmcd), 2013 (29.21-153.28 rmcd), 2017 (141.49-195.12 rmcd) and 2018 (0-33.35 rmcd). This data was integrated with published Oligocene-early Miocene XRF data (205-315.96 rmcd; Liebrand et al., 2016), which was also collected in 2011. The data from 2011, 2013 and 2018 was collected on the MARUM XRF III machine, whilst the data from 2017 was collected on the MARUM XRF II machine. To account for differences in measurement intensity, a number of sections scanned in 2011-2017 were re-measured in 2018. Linear regressions between the 2018 data and the 2011-2017 datasets (Supplementary Figure 1) were used to calibrate the XRF data (Ca, Fe, Si, K, Mn, Ti) and enable comparison across the entire dataset (Supplementary Figure 2). The linear regressions were fit through the origin and follow the format:

$$XRF_{2018} = \frac{XRF_{2011/2013/2017}}{\text{Correction Factor}_{2011/2013/2017}}$$

The individual correction factors for the 2011, 2013 and 2017 datasets are listed below for each element:

| Element | Correction Factor <sub>2011</sub> | Correction Factor <sub>2013</sub> | Correction Factor <sub>2017</sub> |
|---------|-----------------------------------|-----------------------------------|-----------------------------------|
| Ca      | 1.68546                           | 1.65725                           | 0.928056                          |
| Fe      | 1.76194                           | 1.80627                           | 0.975945                          |
| K       | 1.07795                           | 0.686765                          | 1.00915                           |
| Mn      | 1.93137                           | 2.23708                           | 1.08198                           |
| Si      | 1.34063                           | 1.79127                           | 0.864784                          |
| Ti      | 1.84882                           | 1.84107                           | 0.927985                          |

**Supplementary Figure S2:** Downcore XRF data from Site 1264 calibrated to the 2018 dataset, including (A)  $\ln(\text{Ca}/\text{Fe})$ , (B) Si counts, (C) Fe counts, (D) K counts, (E) Ti counts, and (F) Mn counts.

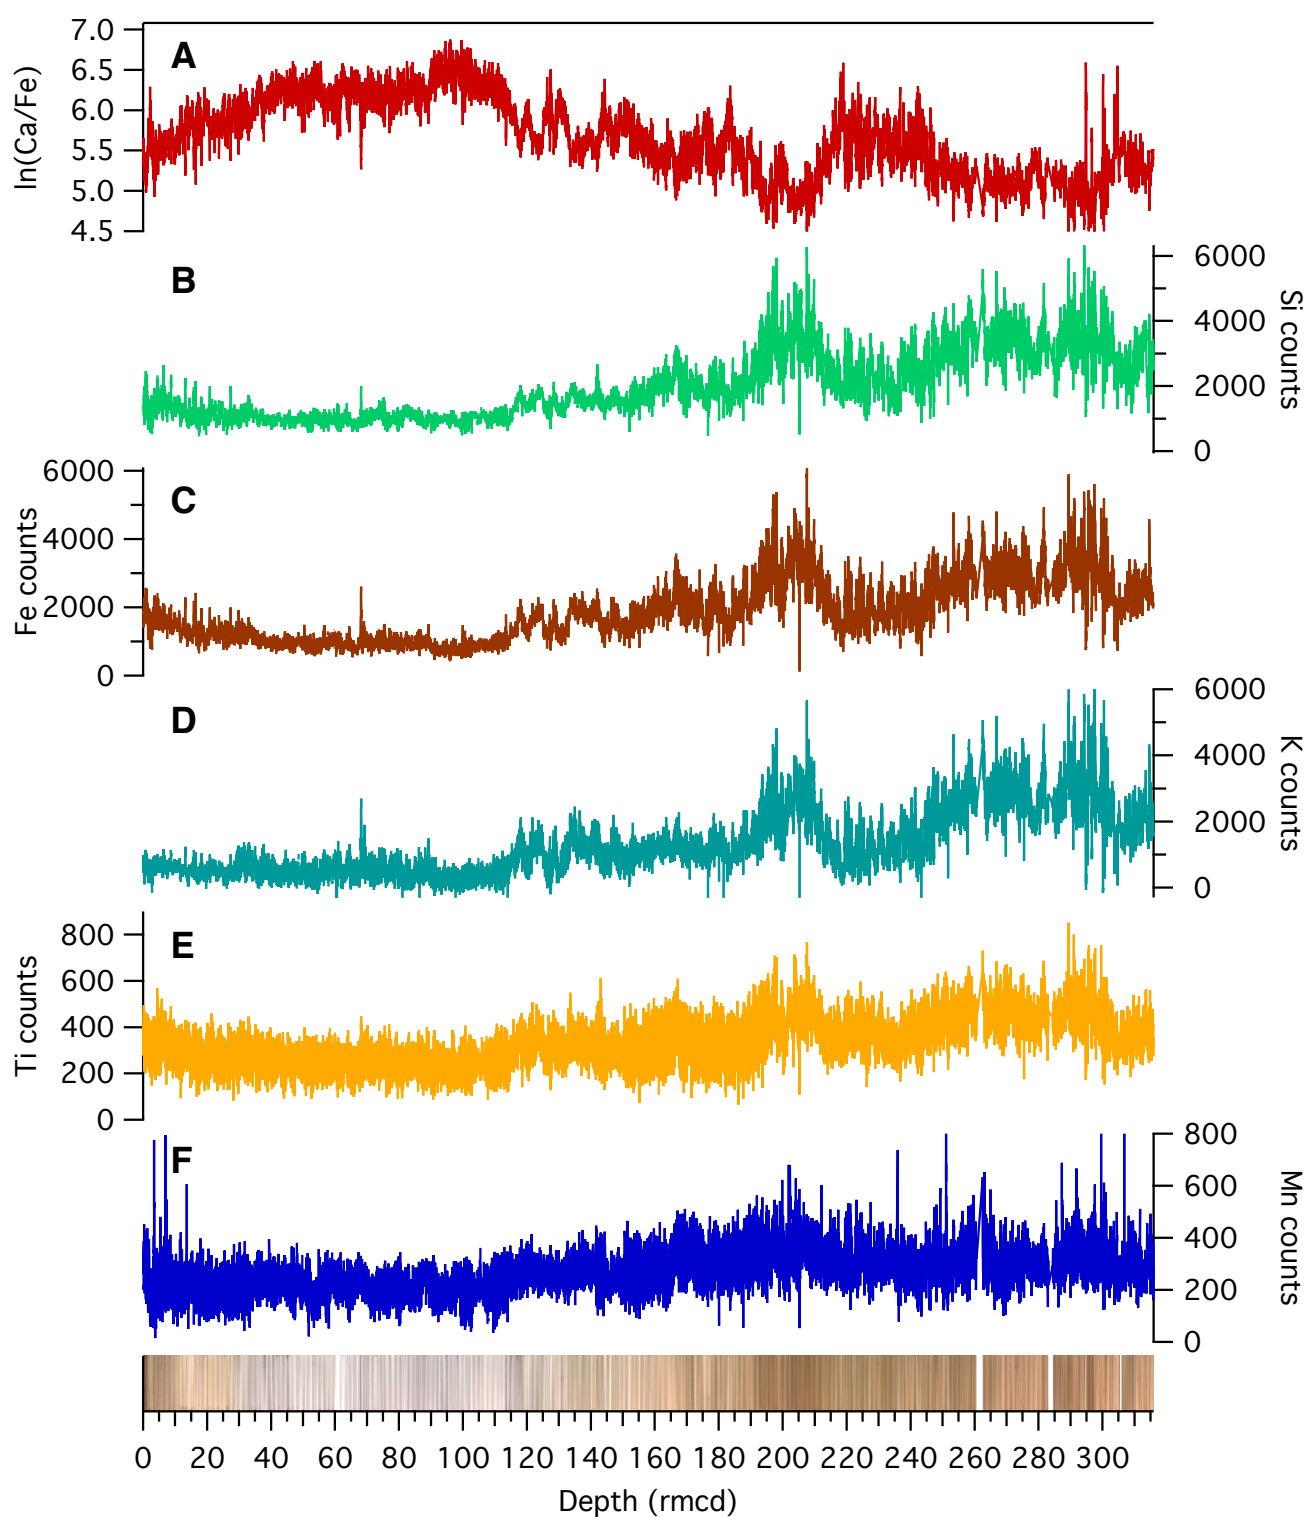



## 1.2. Composite Depth Scale and Splice Revisions

**Supplementary Figure S3:** The Site 1264 A) shipboard and B) revised composite splices between 0 and ~316 m revised composite depth (rmcd) in ~30 m intervals. Each panel consists of the individual hole and splice line scan composite core images, with the XRF  $\ln(\text{Ca}/\text{K})$  and Ba ratios. Tie point locations are shown by yellow (upper tie point within a core) and red (lower tie point within a core) lines.

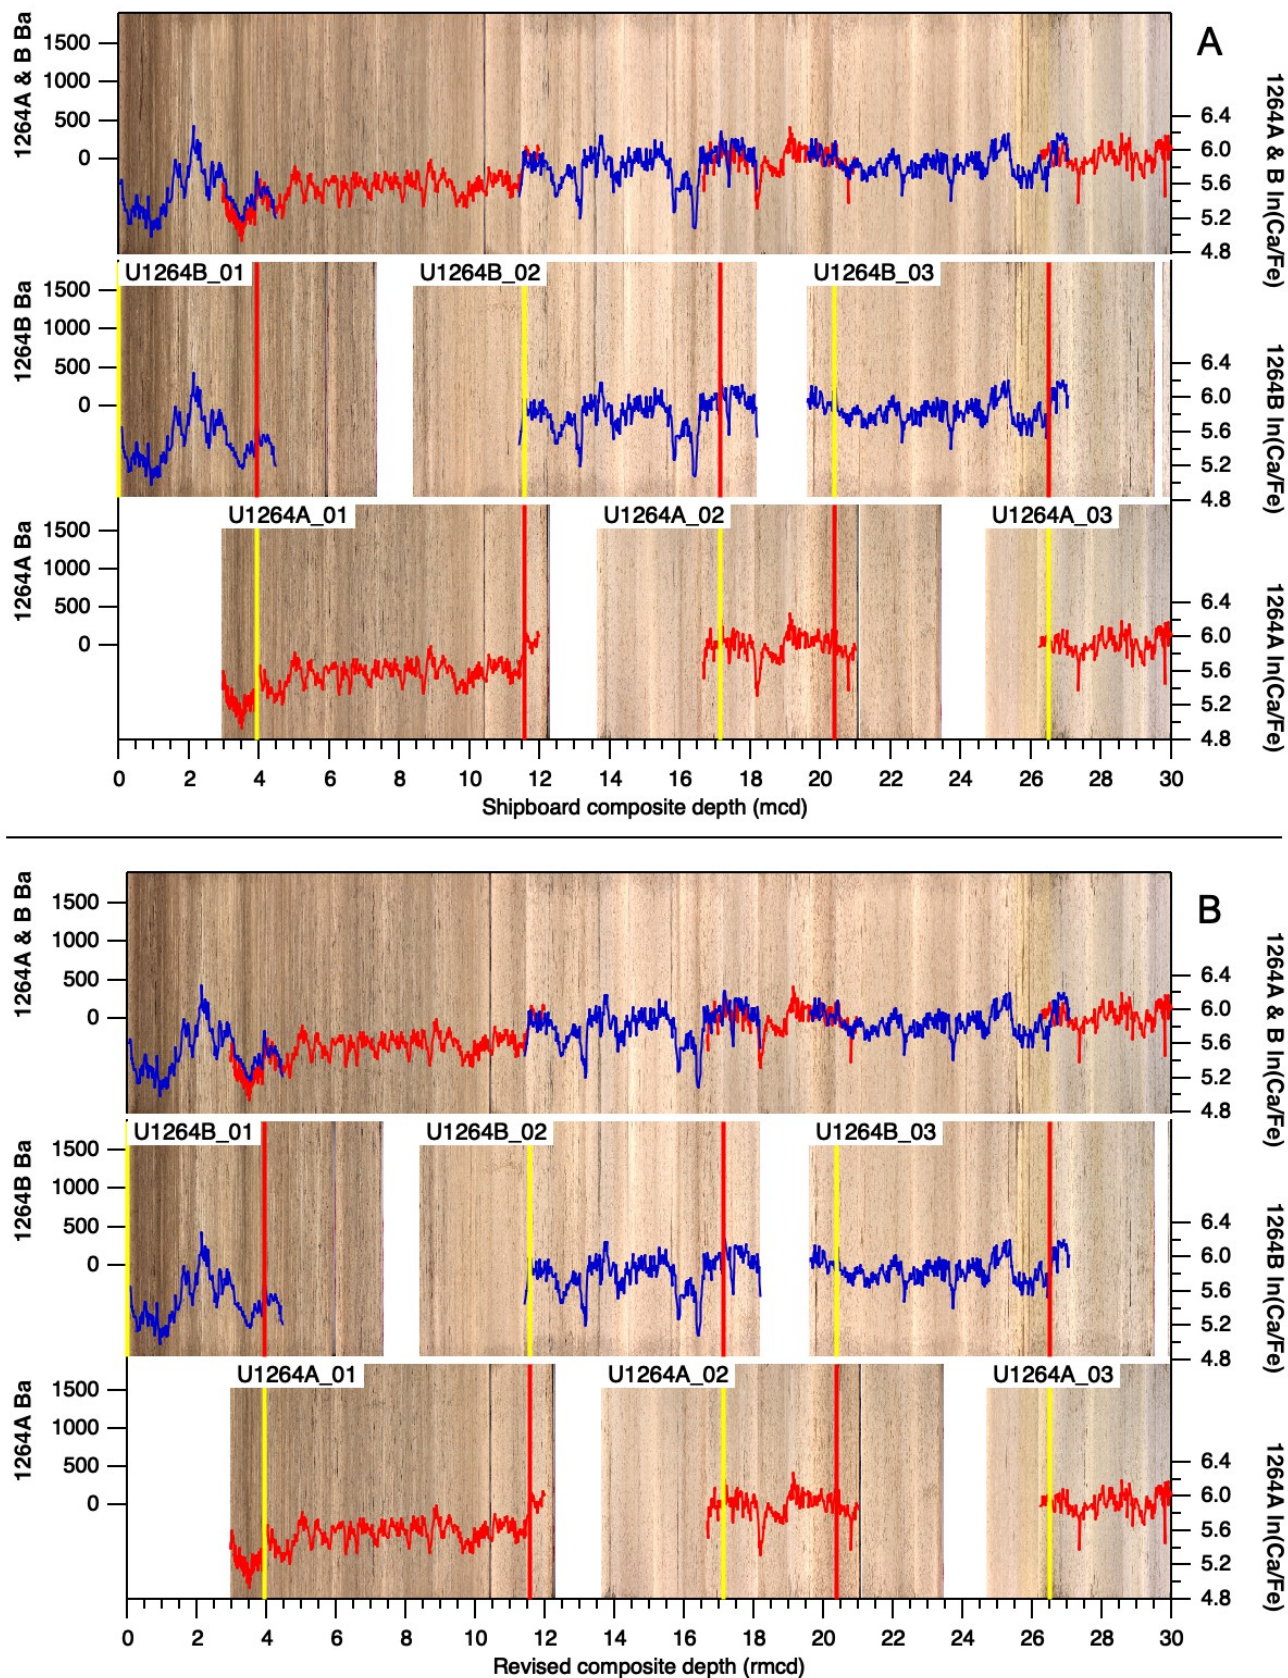



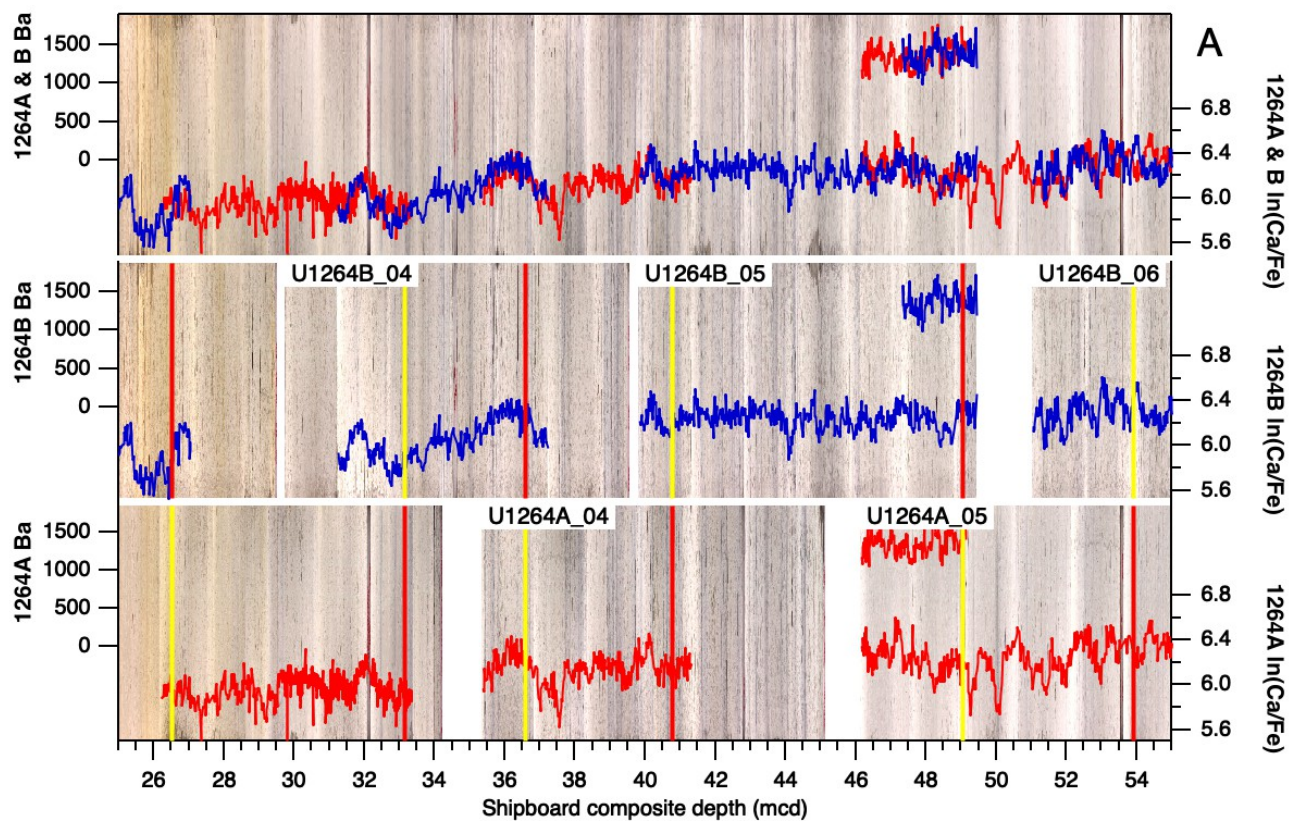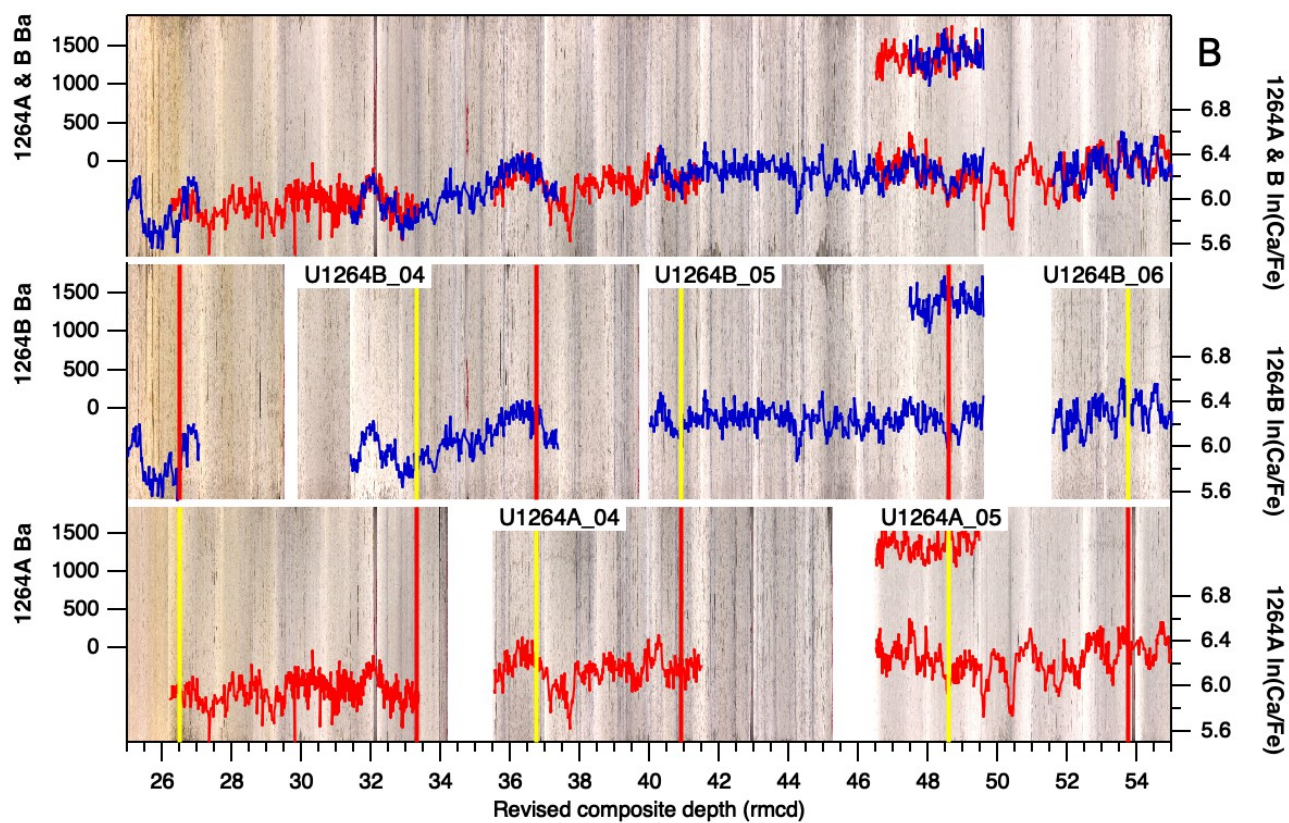



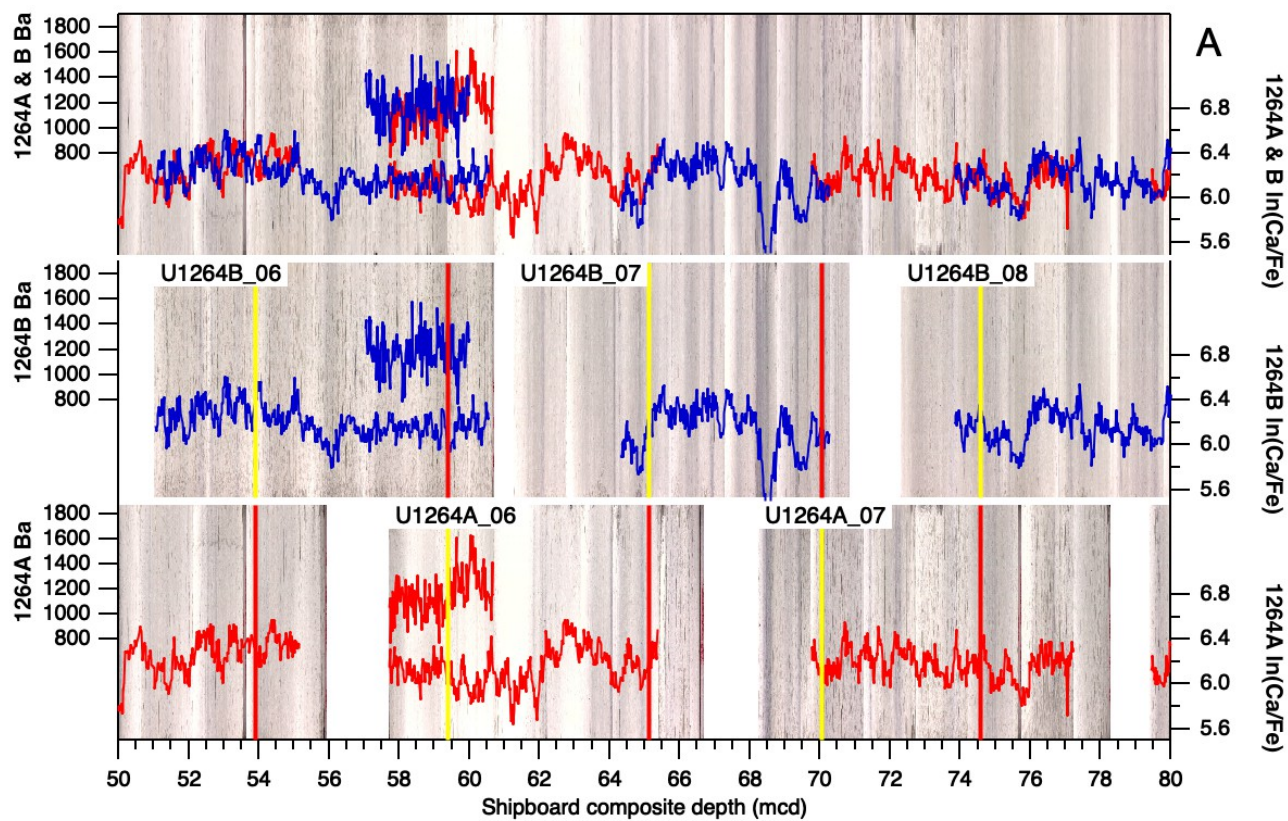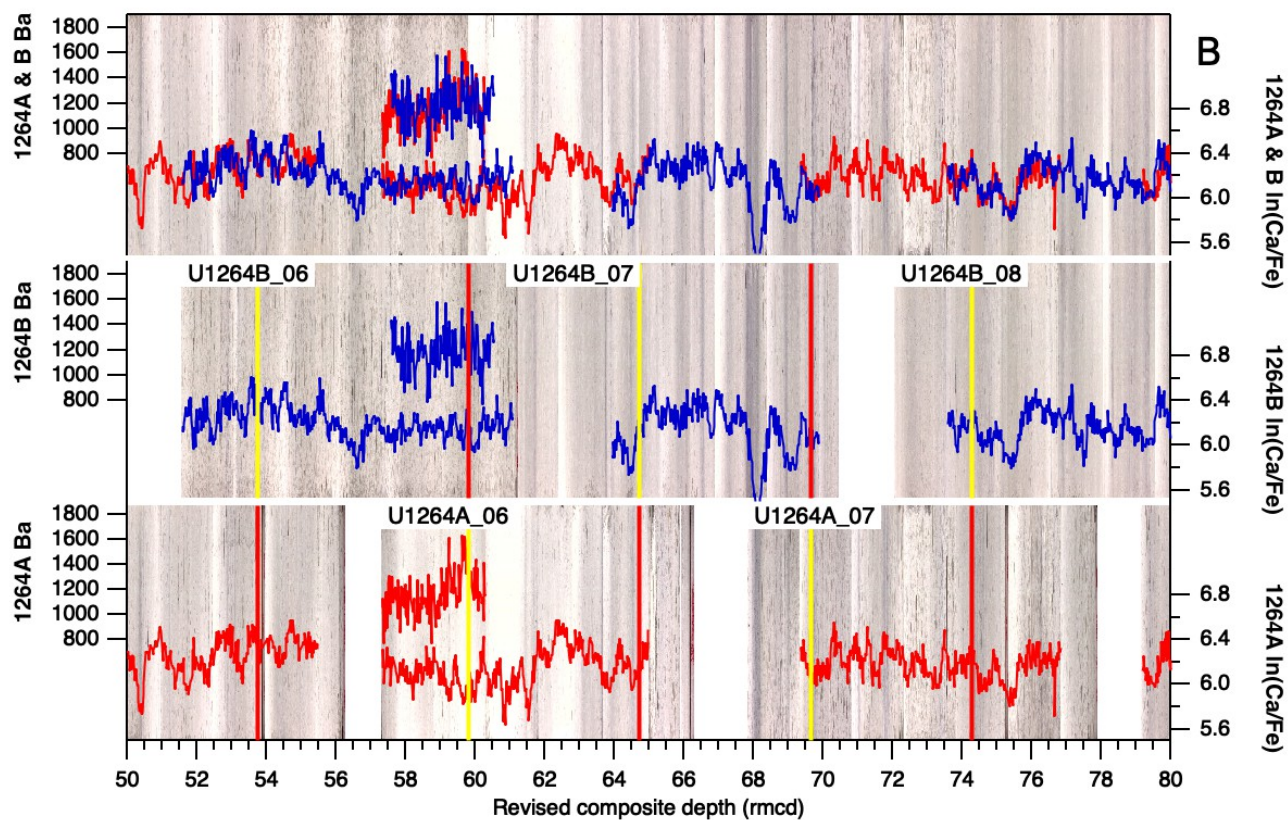



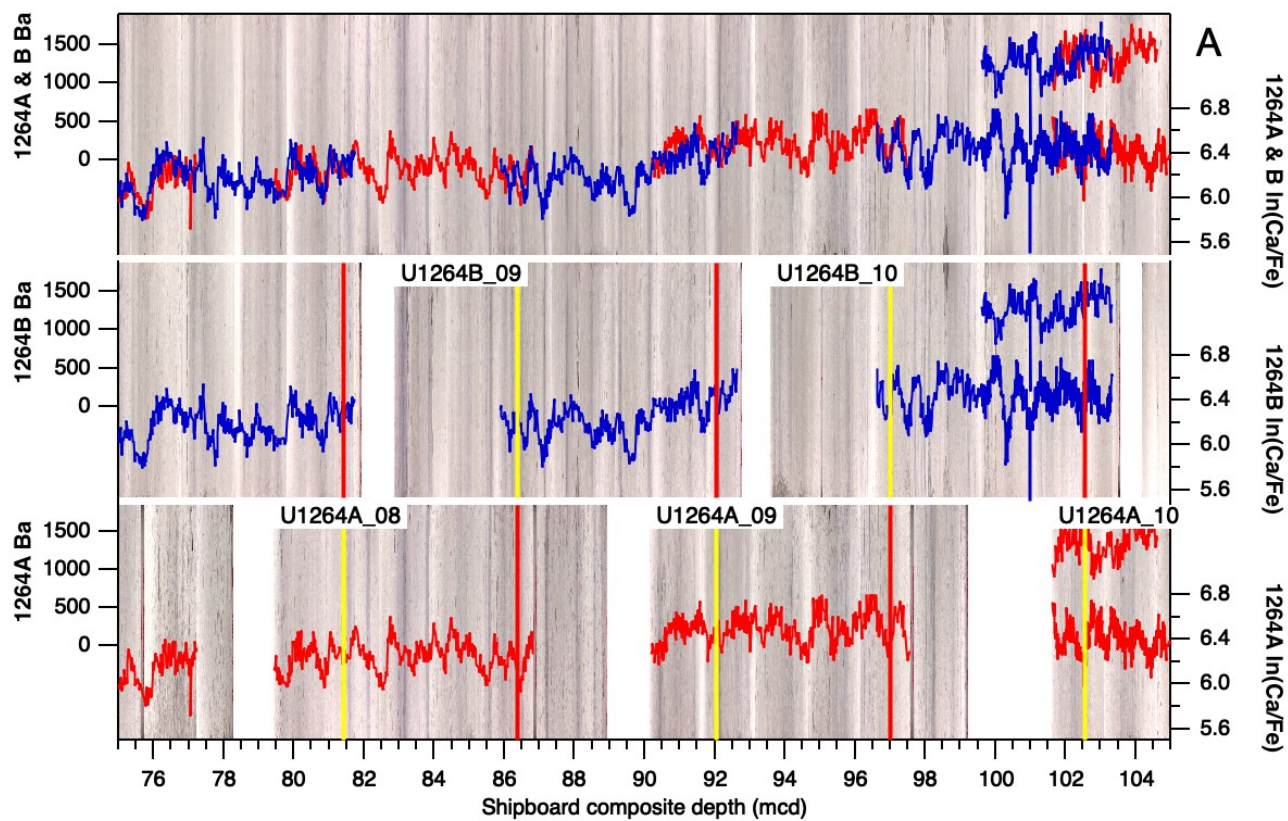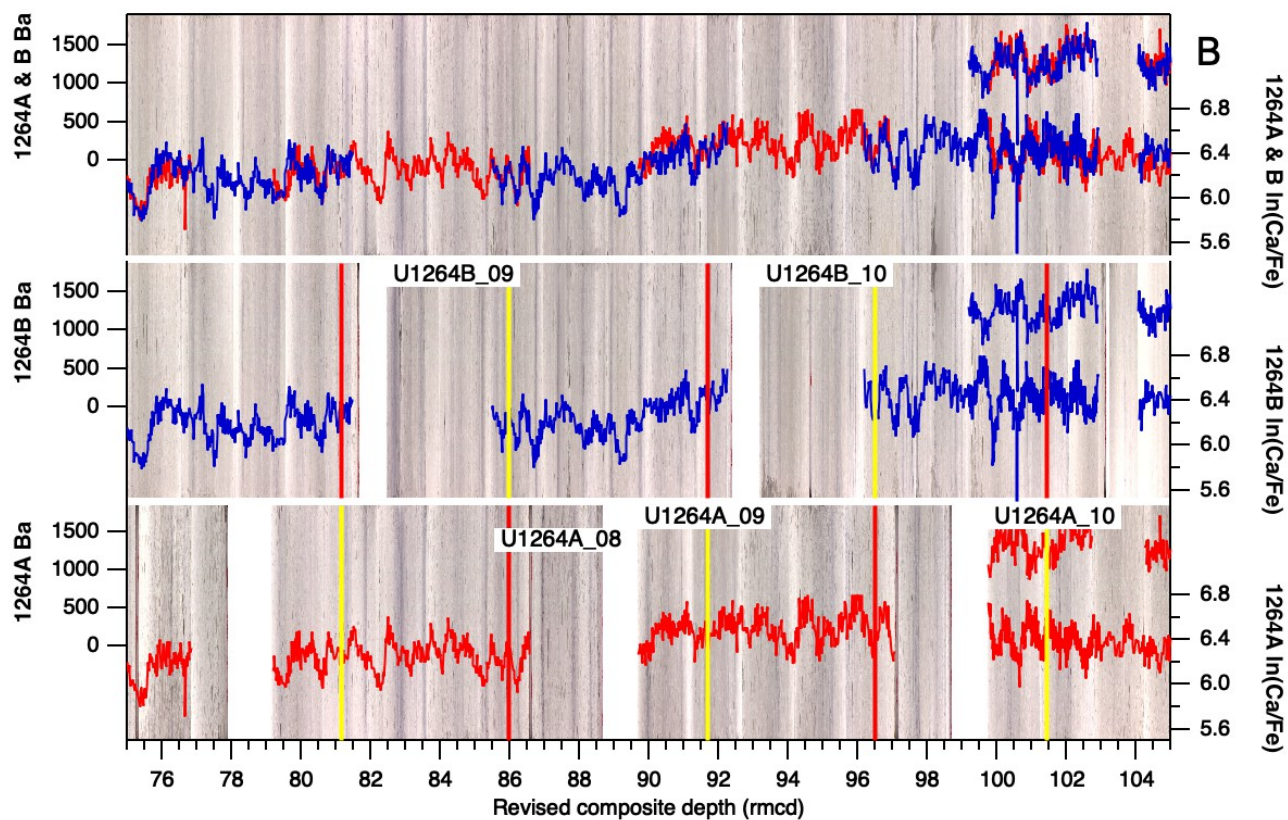



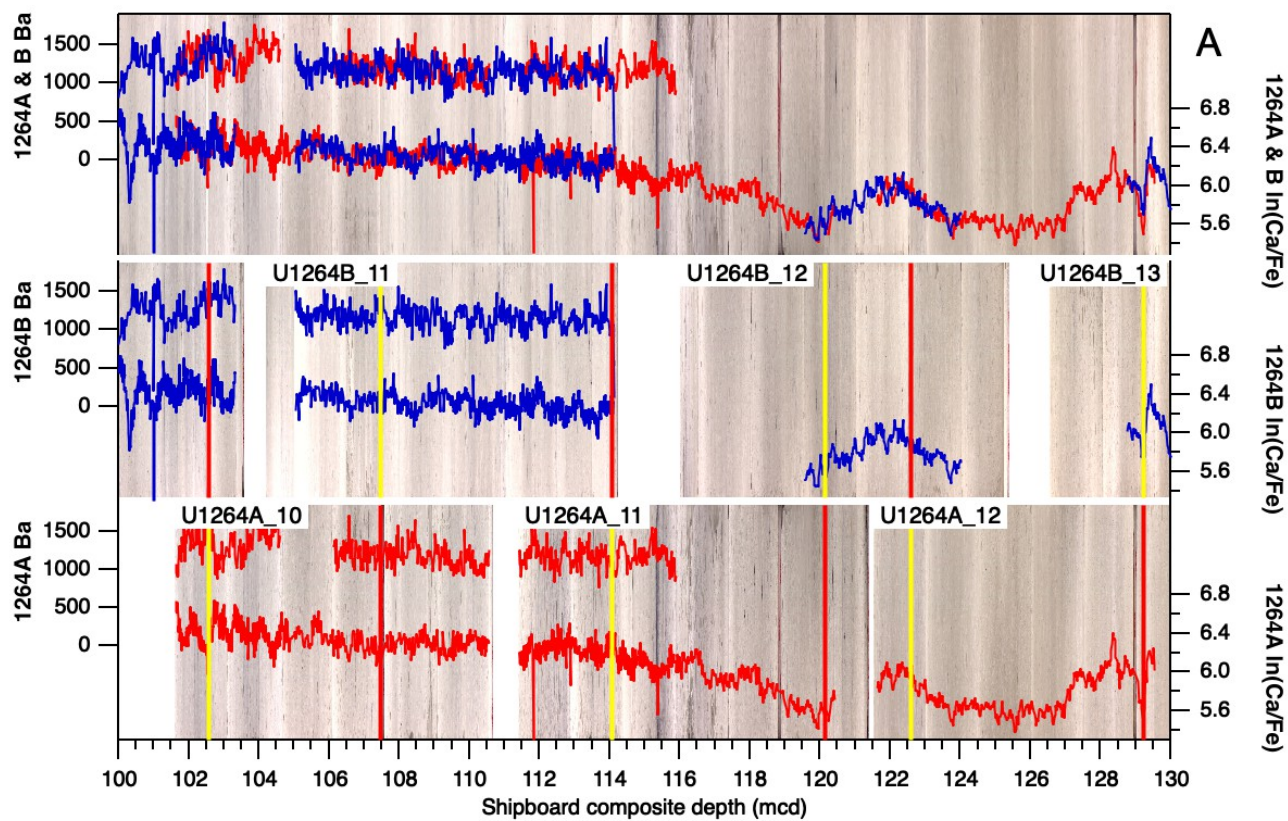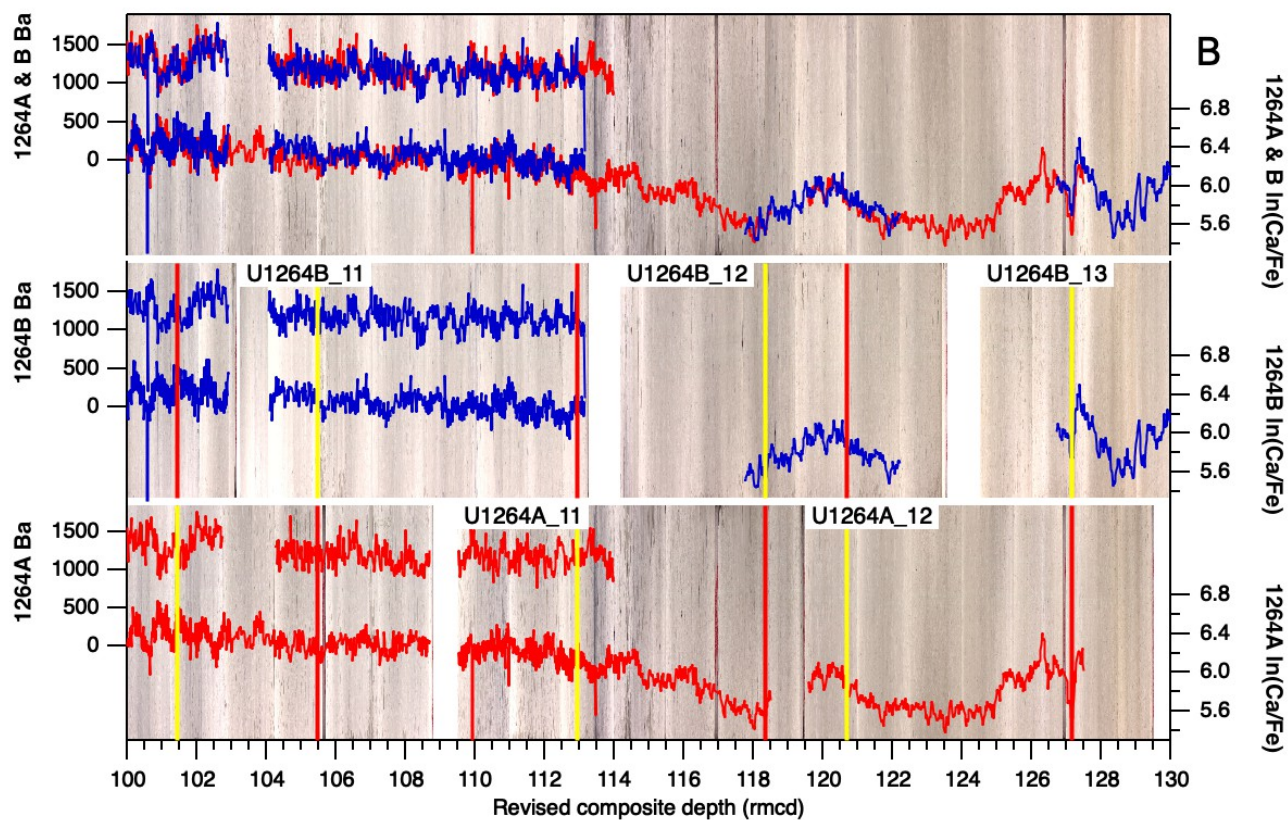



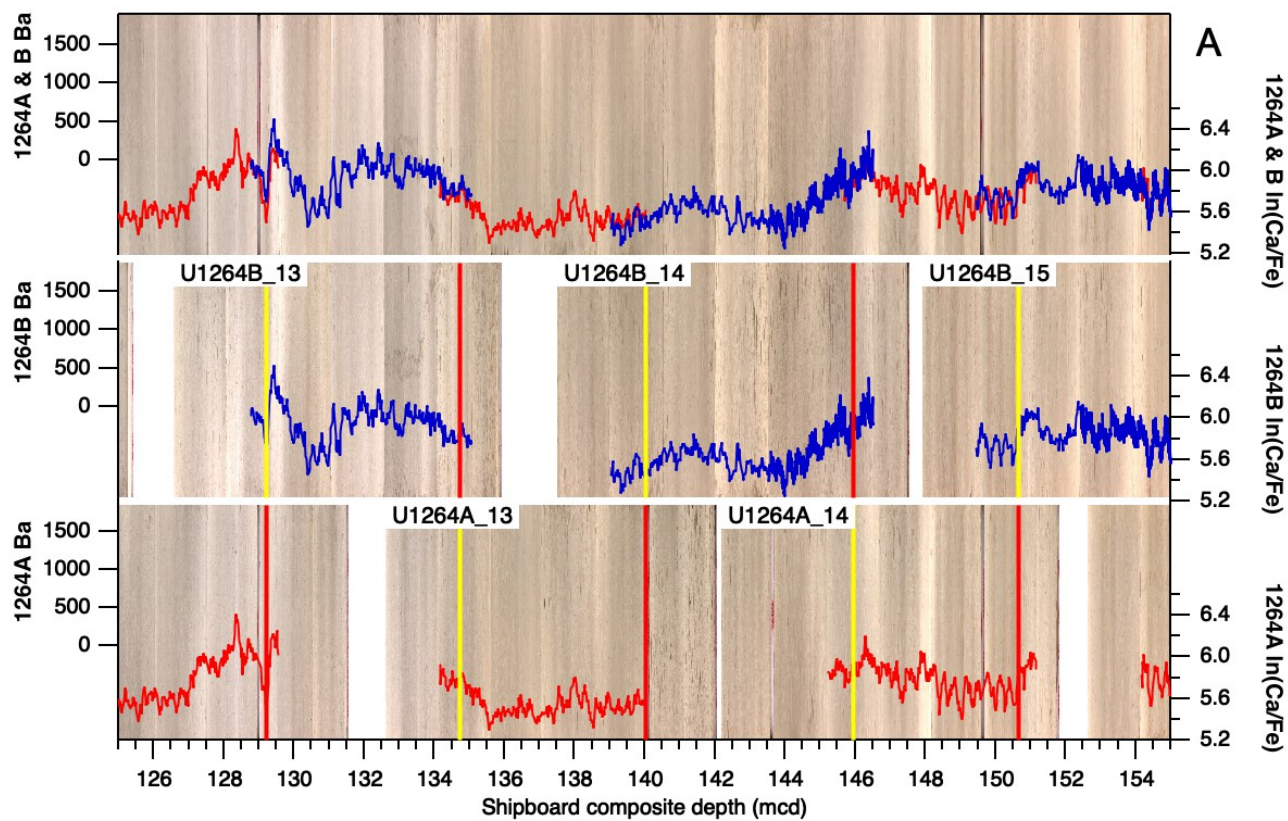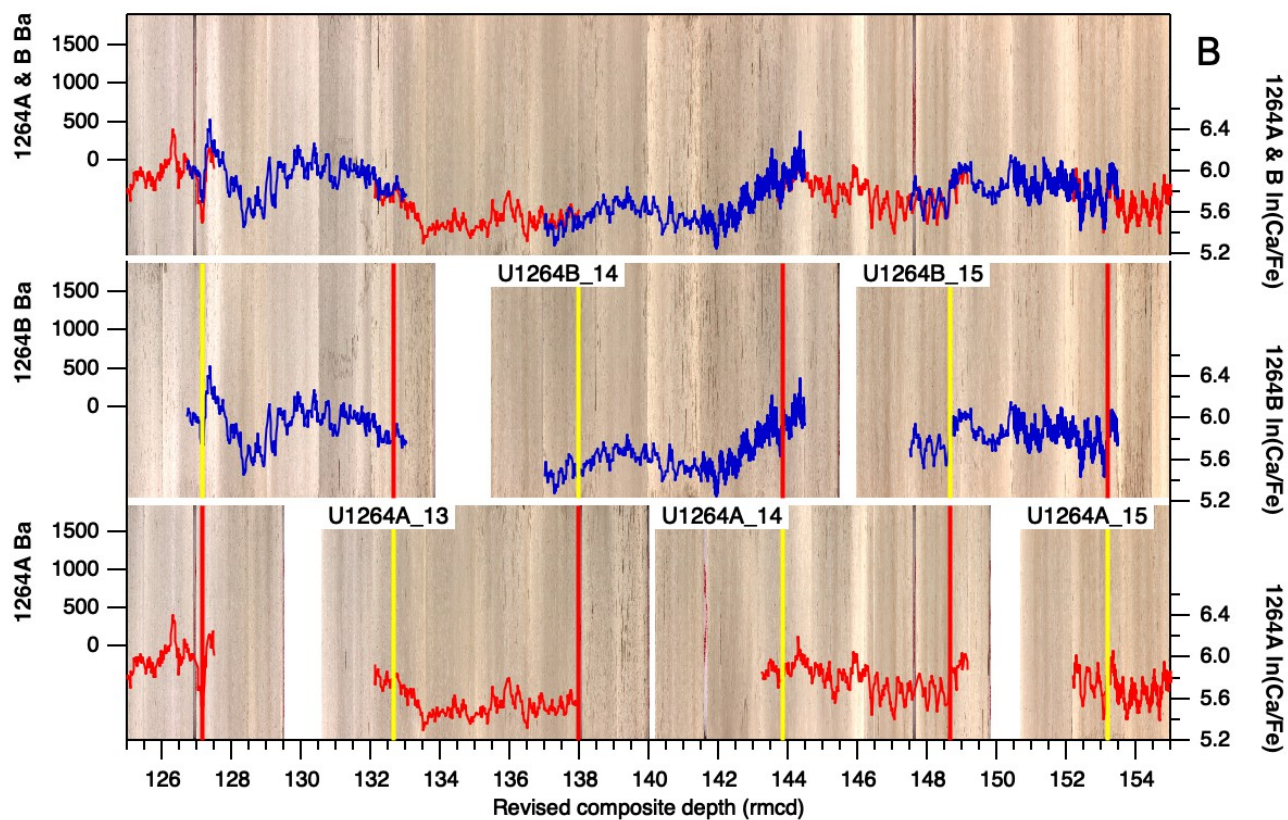



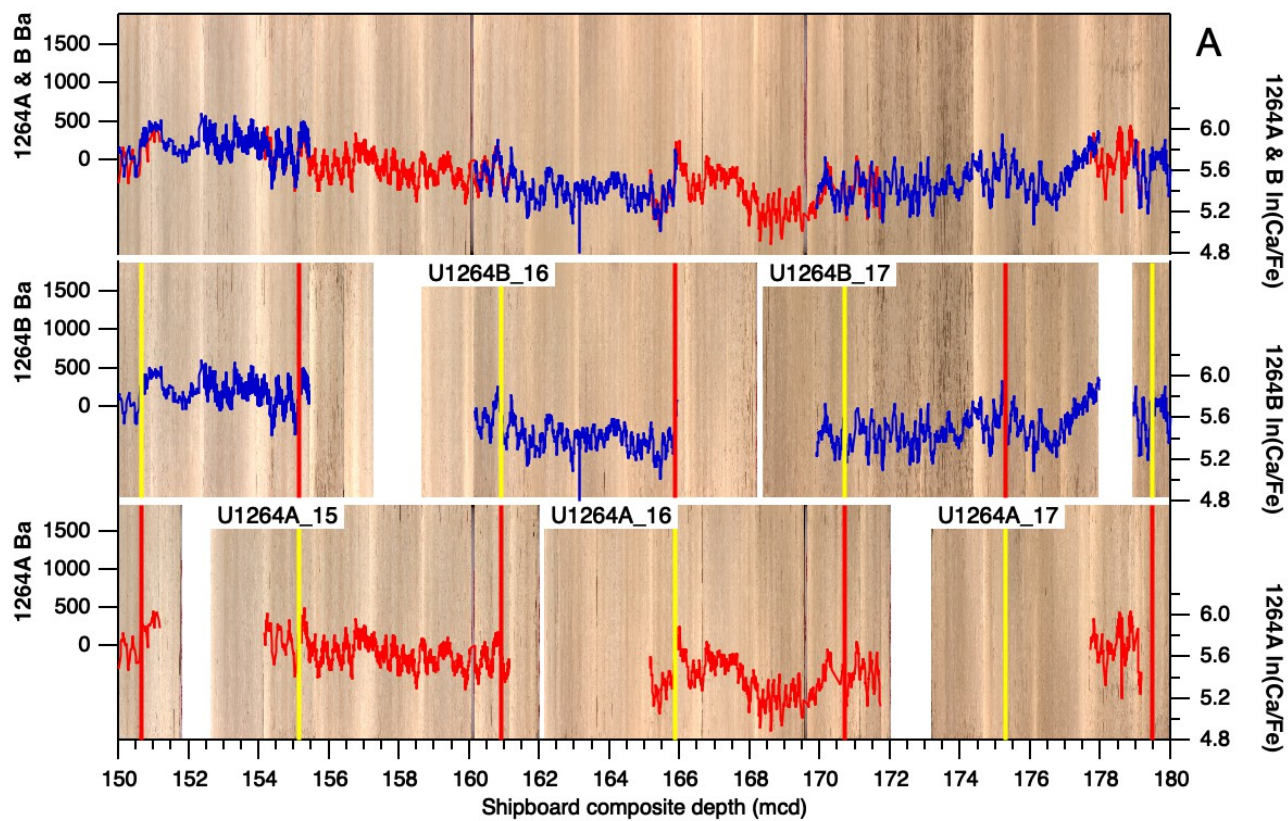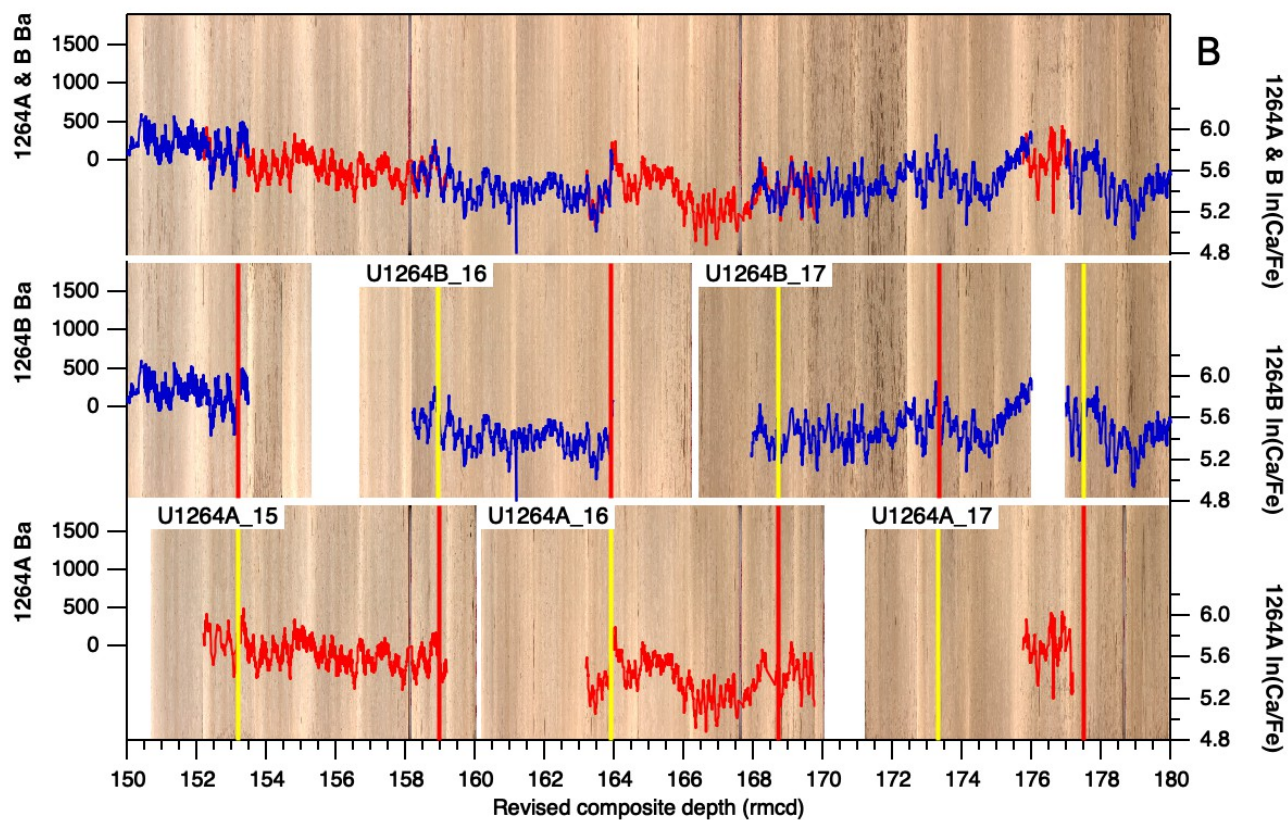



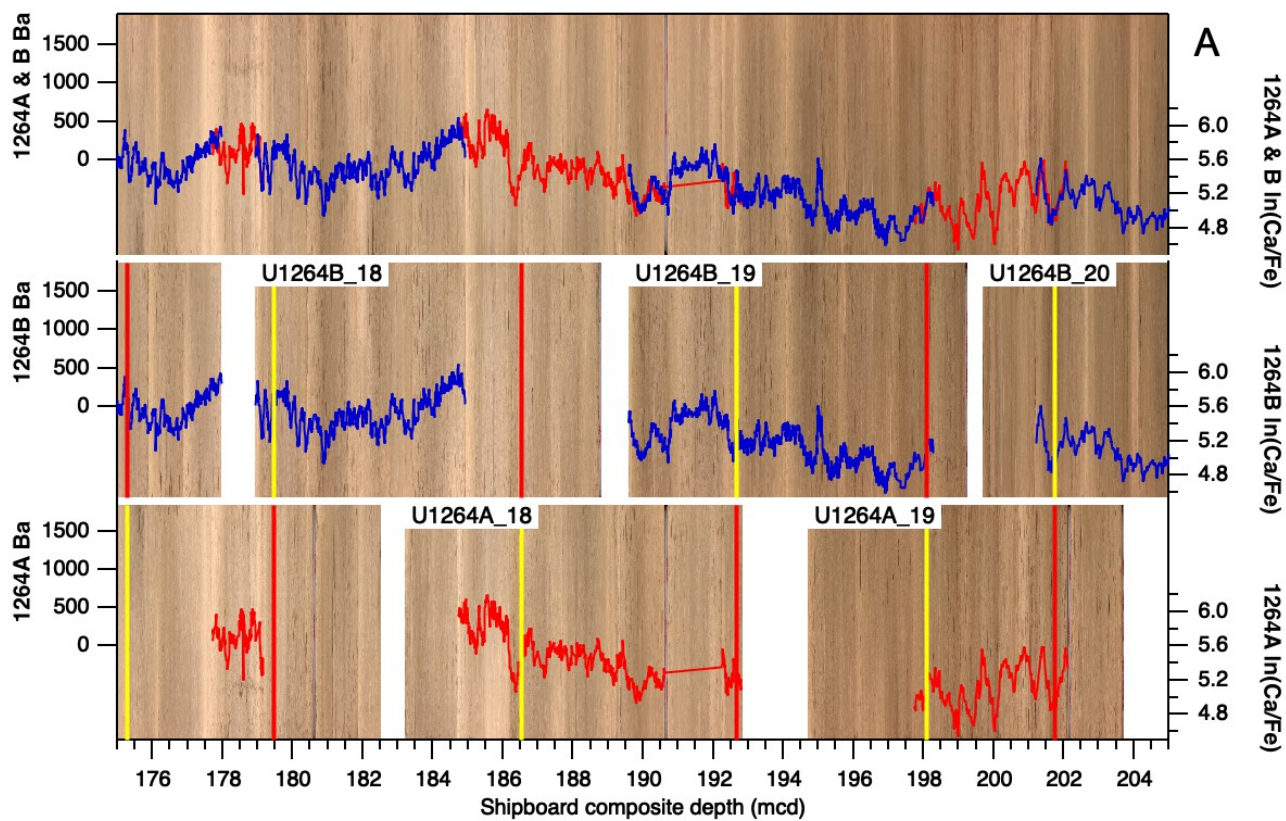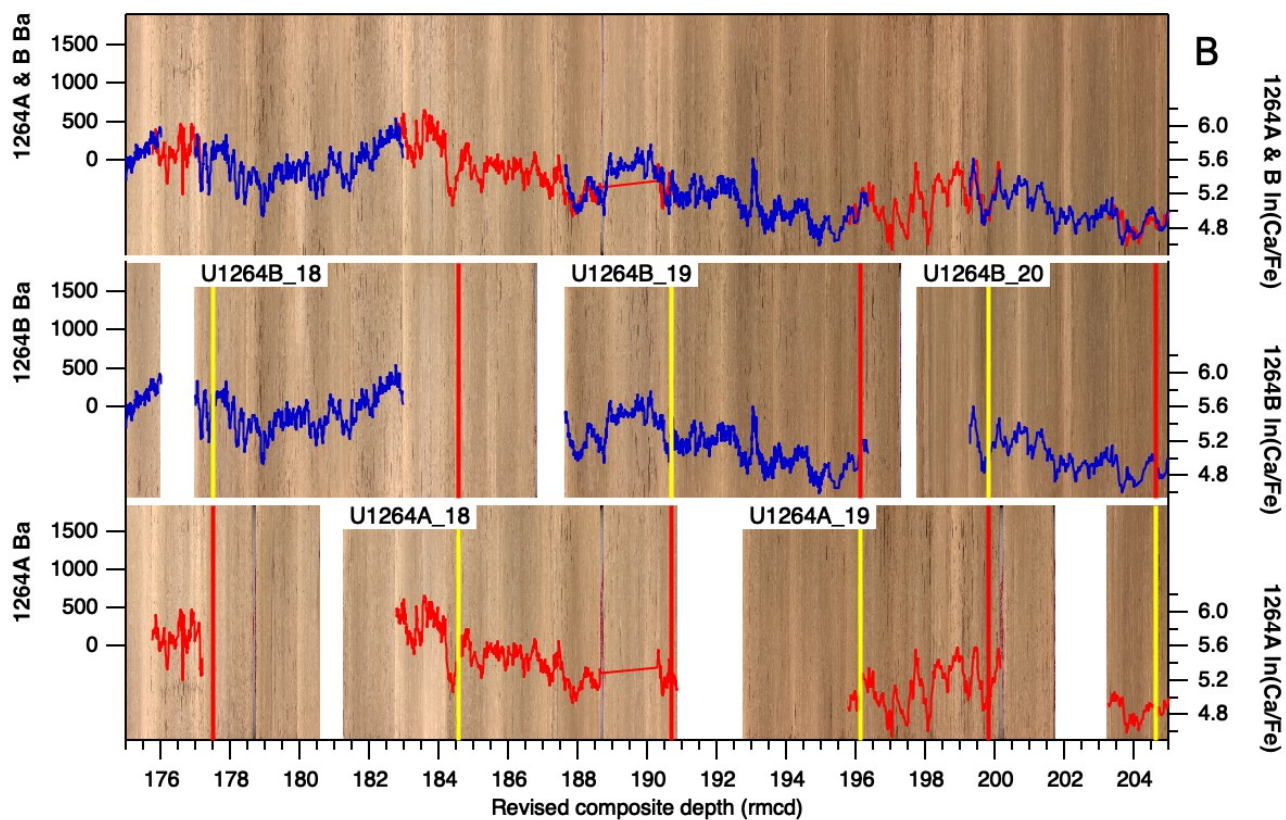



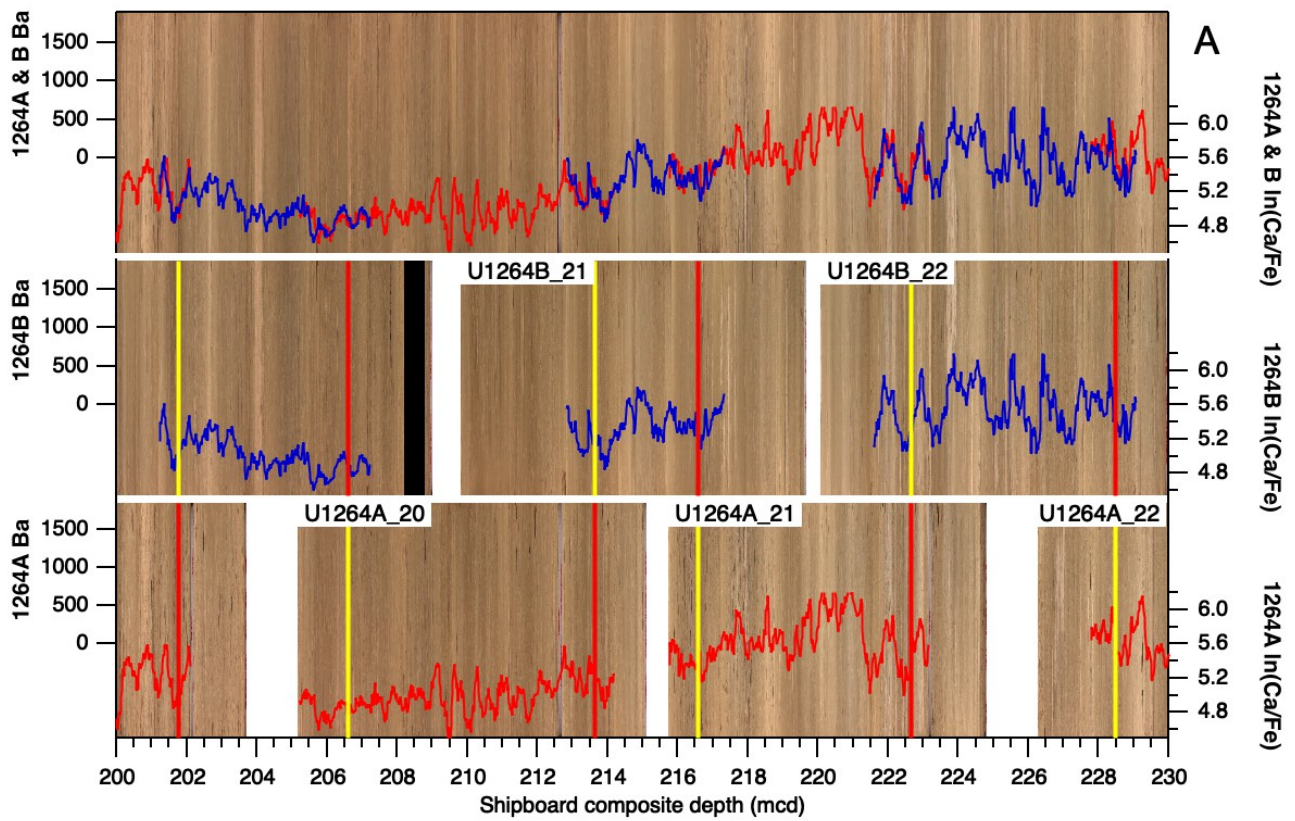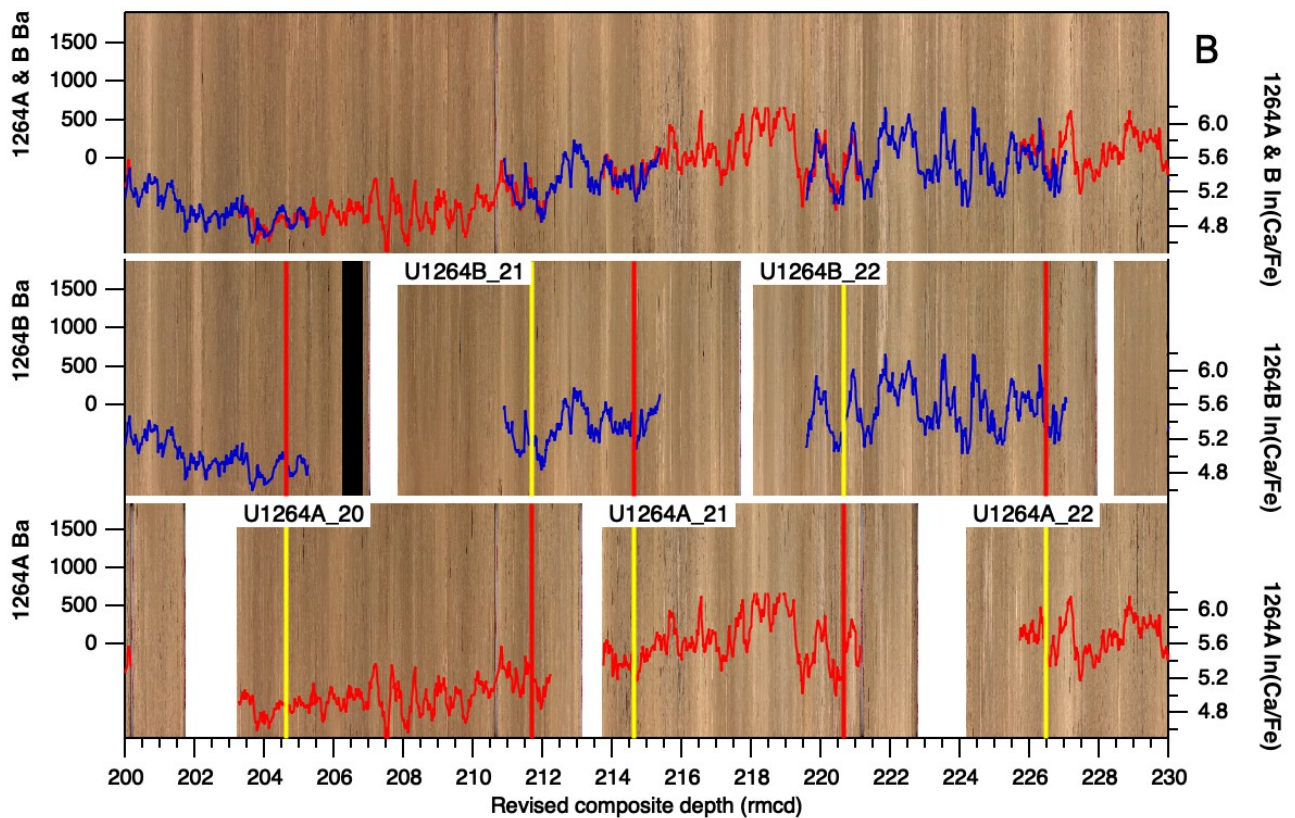



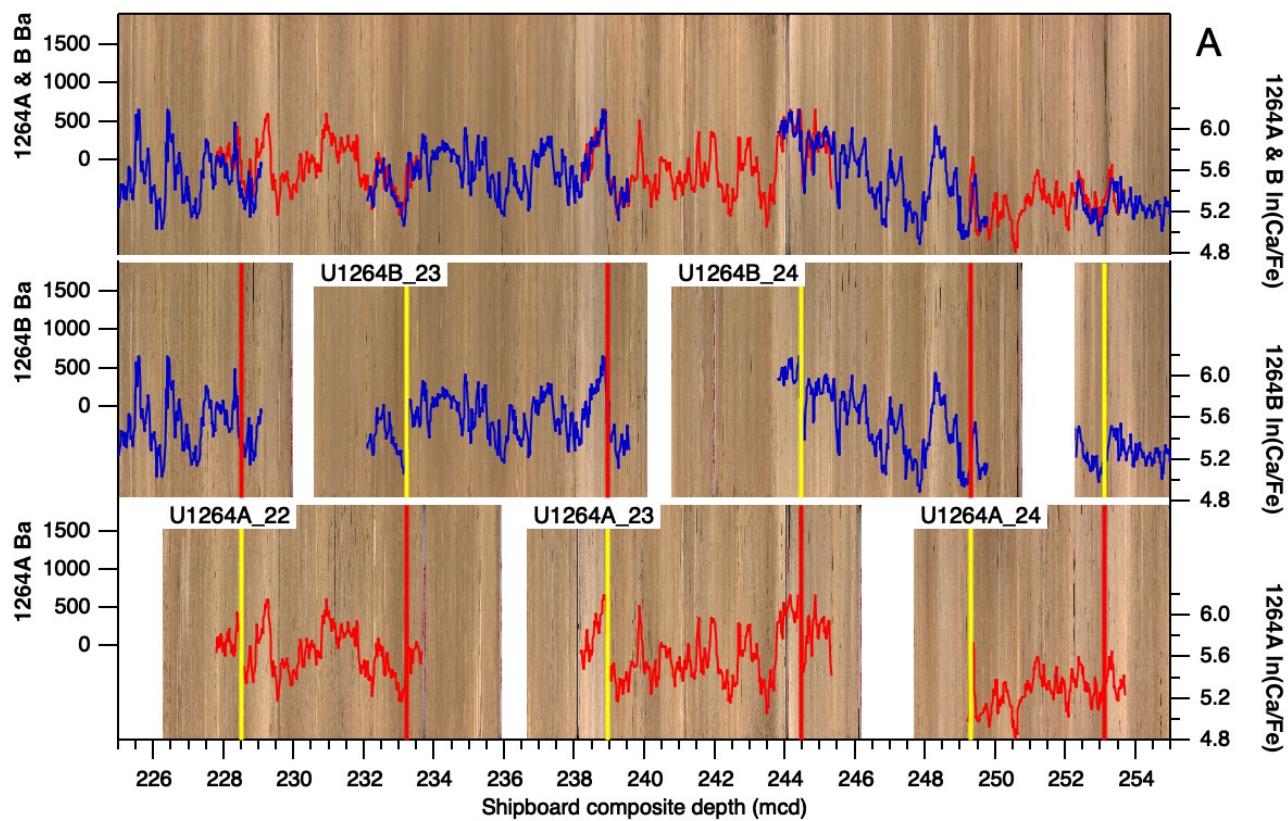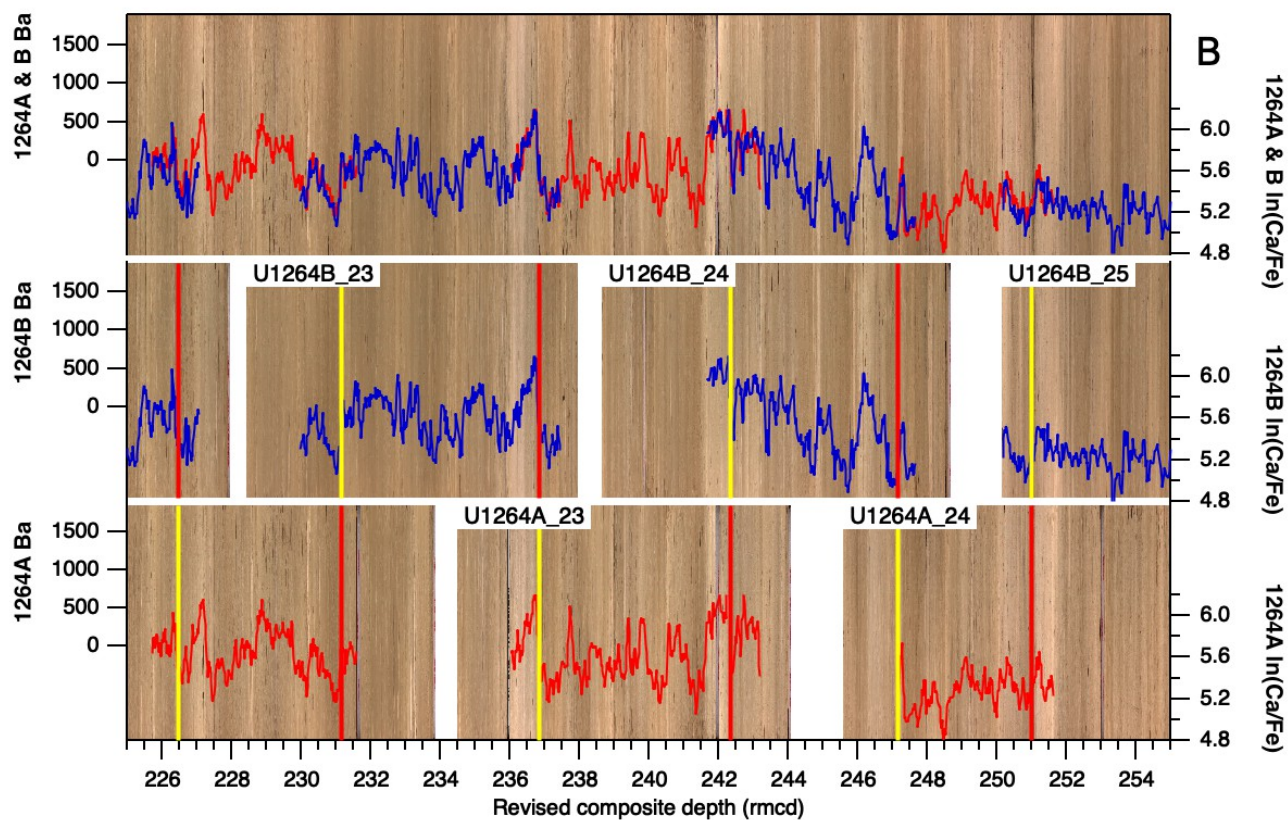



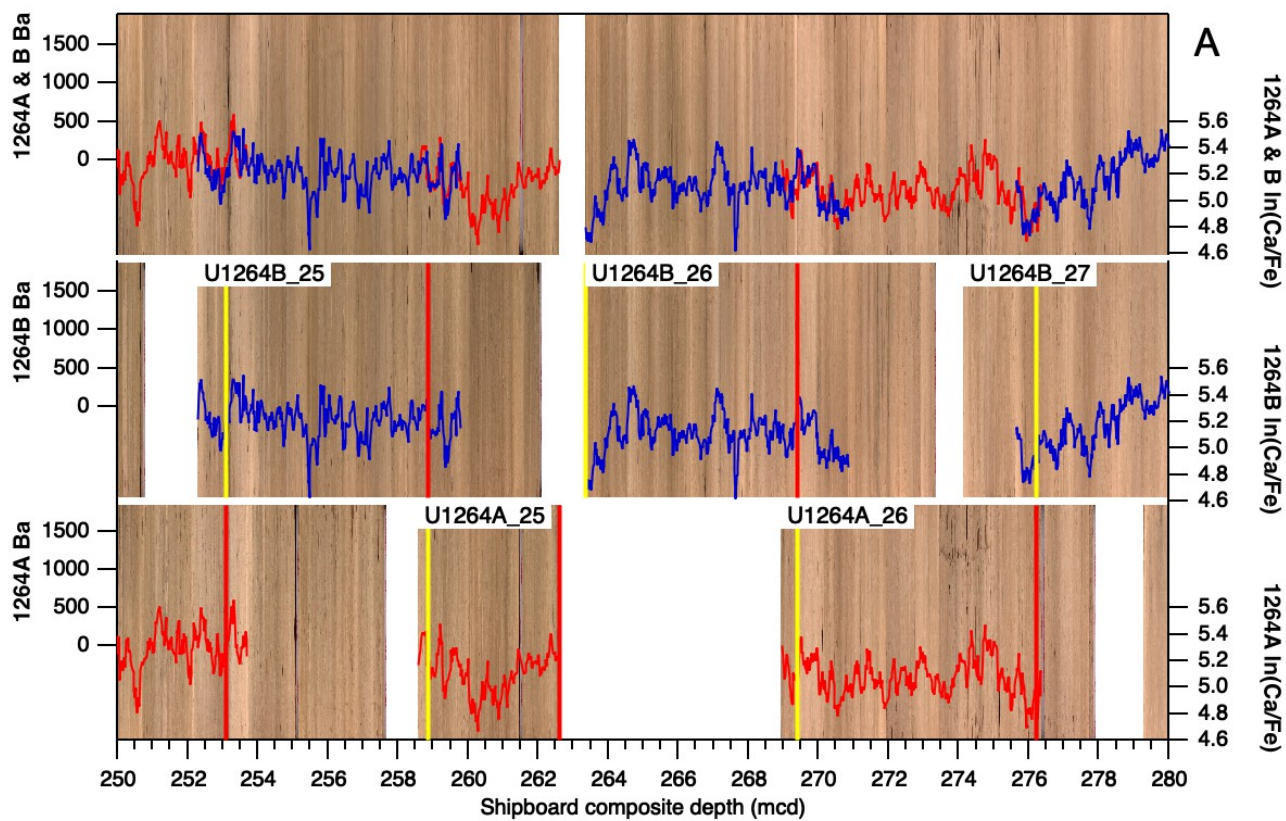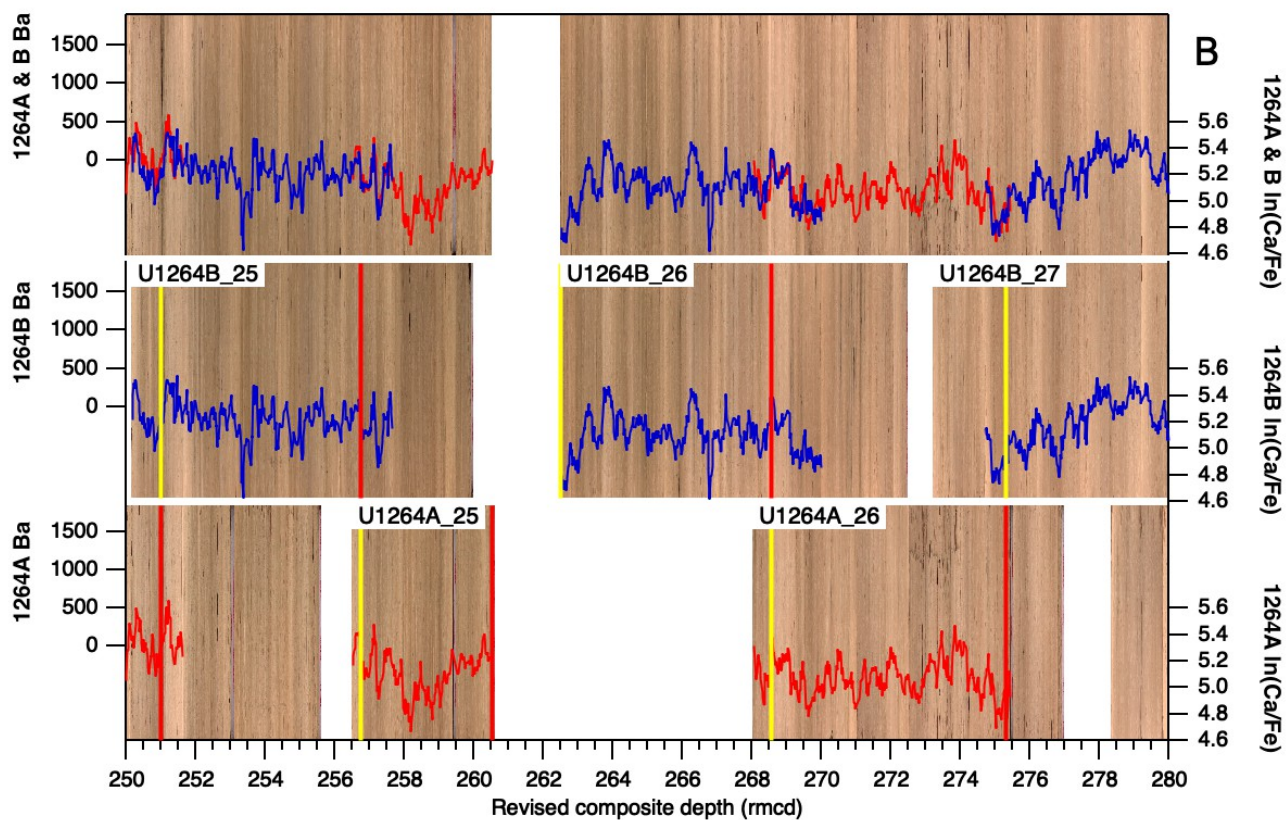



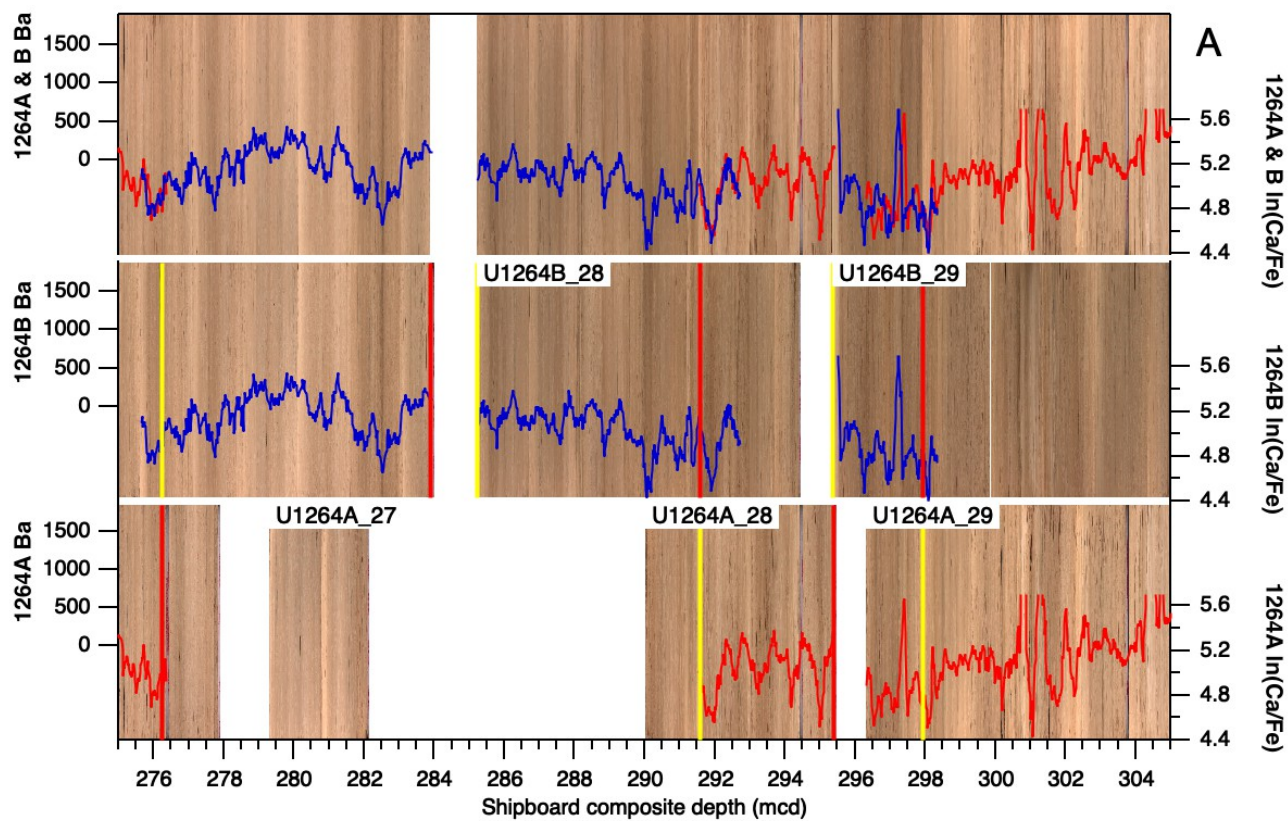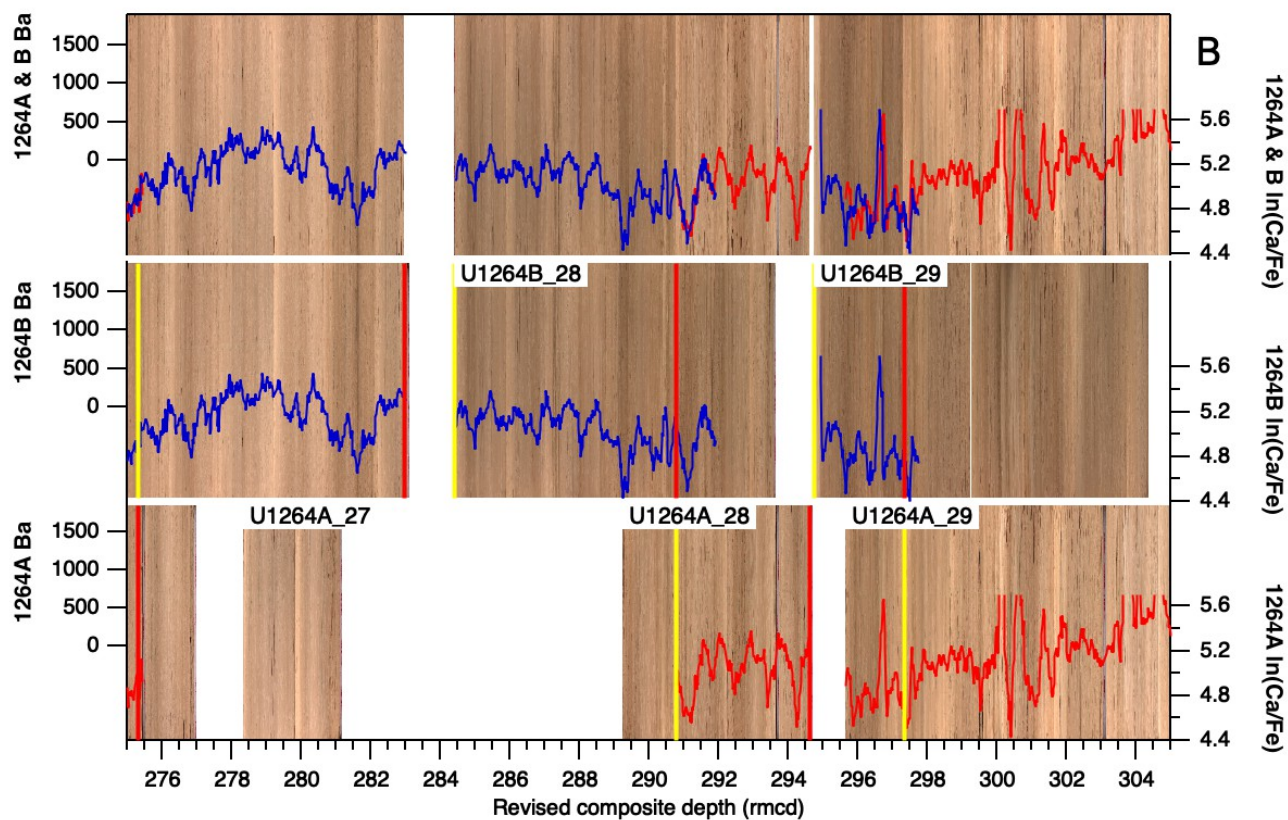

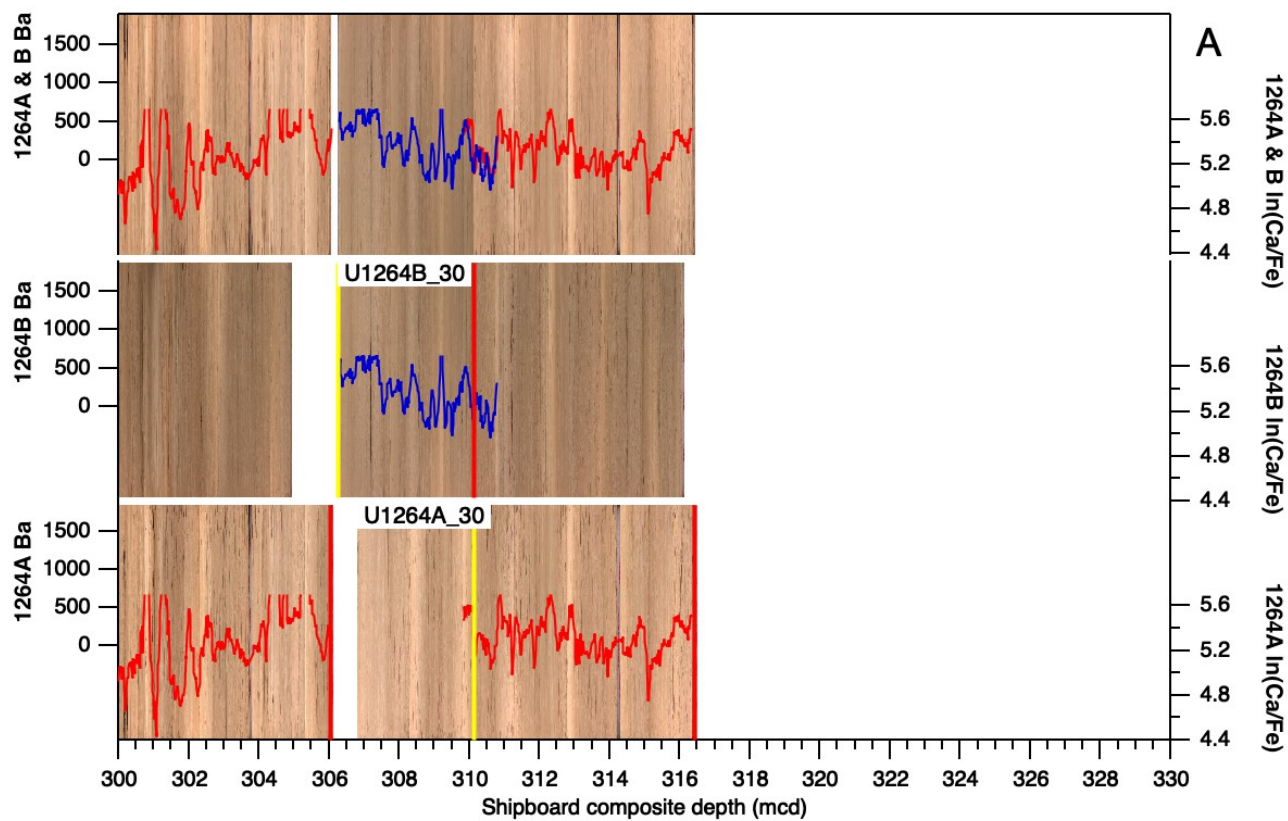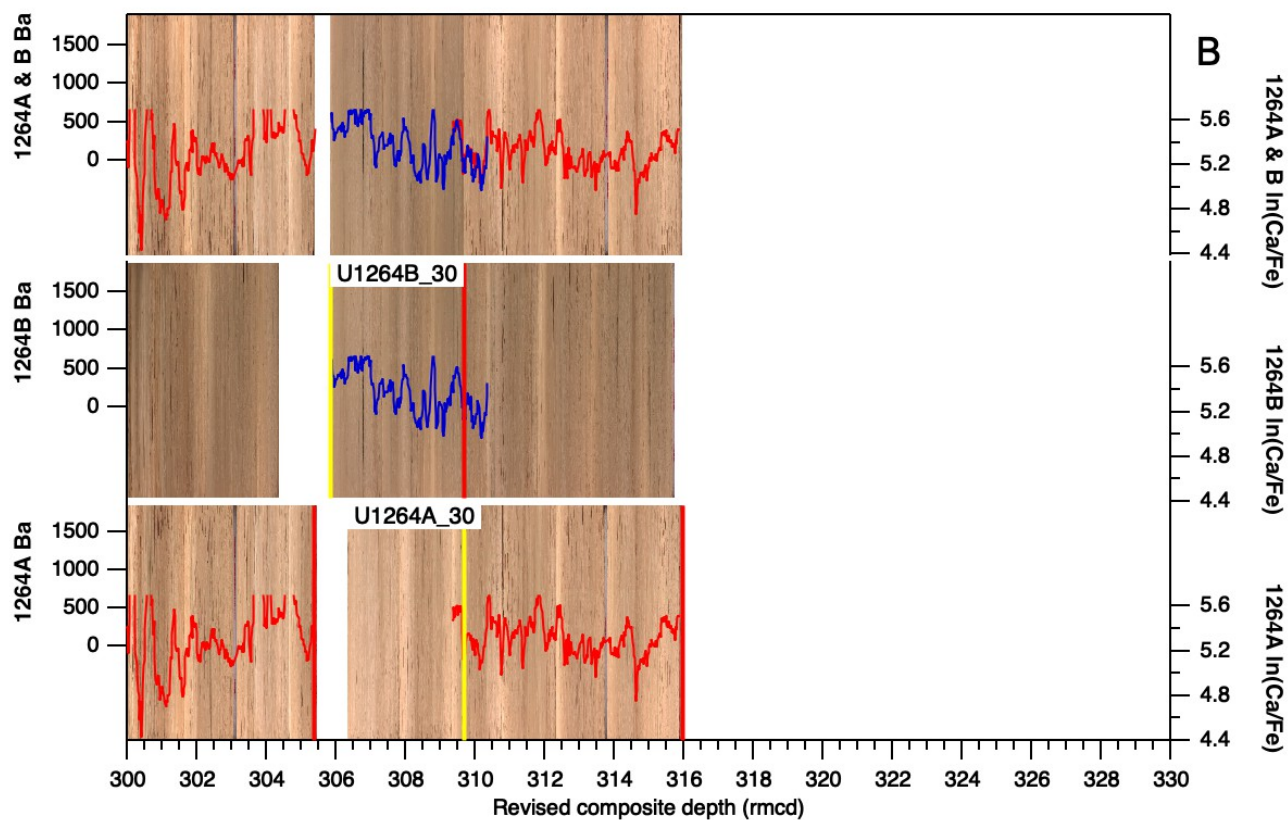



### 1.3. Offsplice-splice mapping pairs and integration of Sites 1264 and 1265

**Supplementary Figure S4:** The mapping pairs for Core 1264B-29H from Liebrand et al., 2016, 2018 were revised. A) shows the original alignment between the splice and Core 1264B-29H 650/450 nm colour reflectance data; B) shows the revised alignment between the splice and Core 1264B-29H 650/450 nm colour reflectance data.

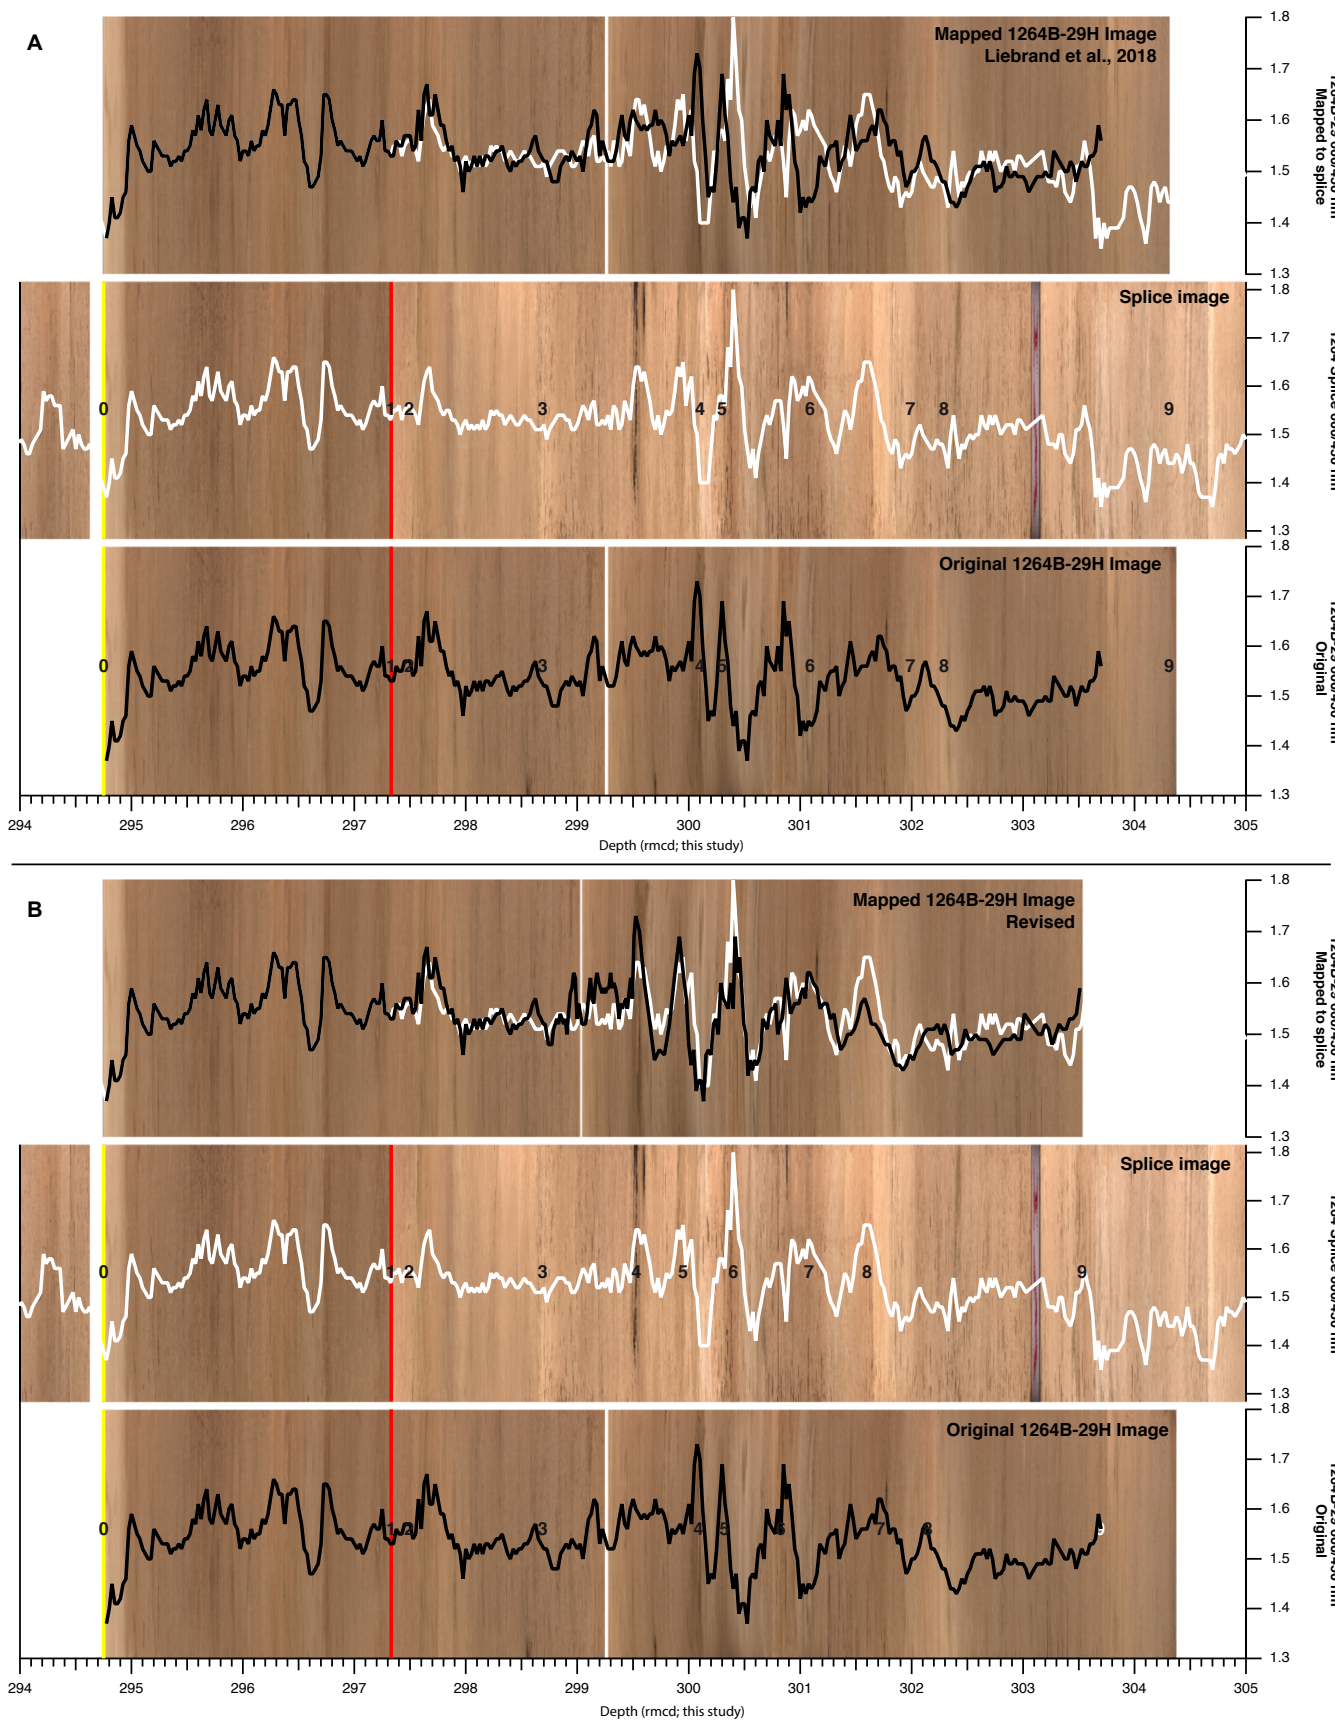



**Supplementary Figure S5:** The lower three panels show how the composite core images from Sites 1264 and 1265 (Westerhold et al., 2015) were merged to provide a continuous composite core image. The upper panel shows how well the Site 1264 %CaCO<sub>3</sub> and Site 1265 %CaCO<sub>3</sub> data (Liebrand et al., 2016) agrees in this interval.

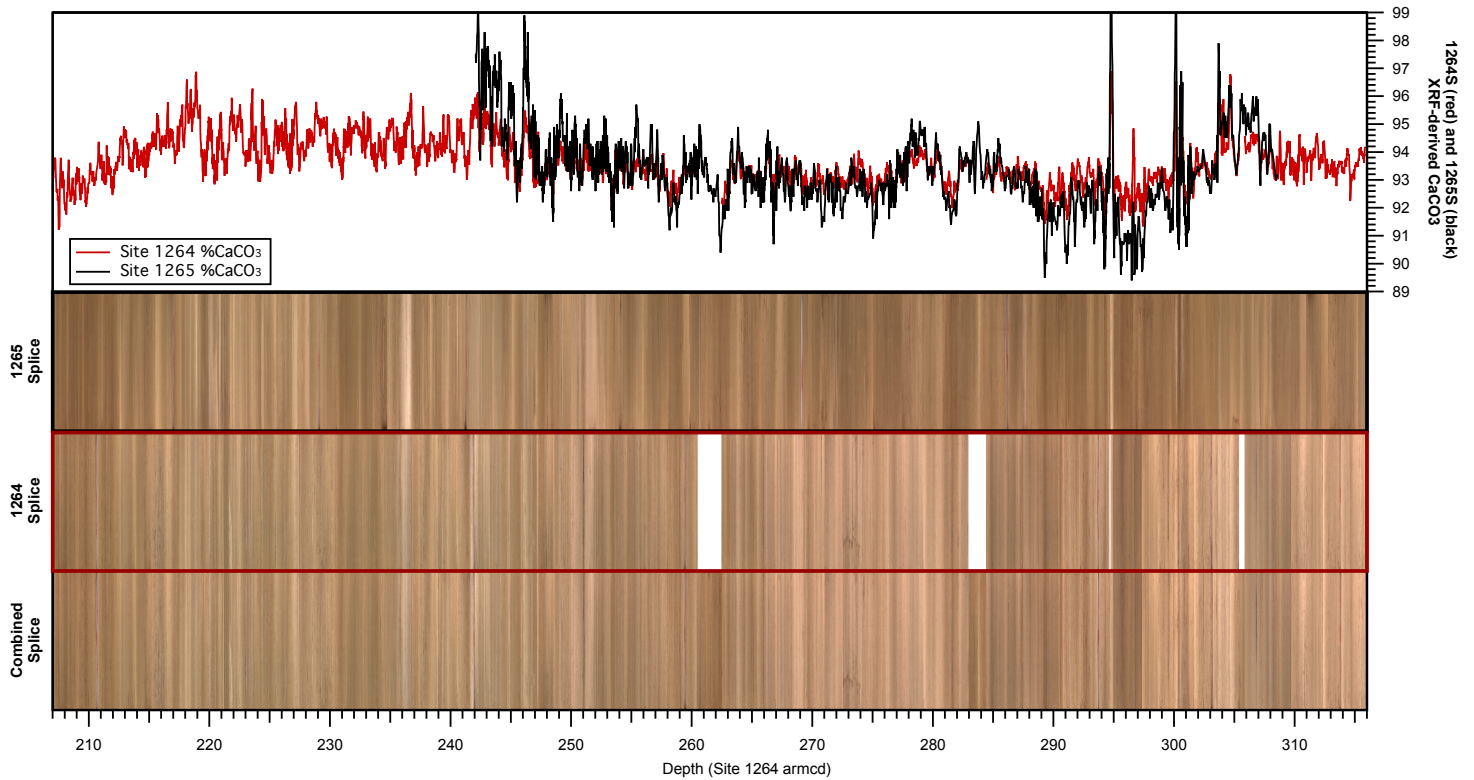

#### 1.4. Calibration $\ln(\text{Ca}/\text{Fe})$ to %CaCO<sub>3</sub> and calculating mass accumulation rates (MARs)

**Supplementary Figure S6:** Showing the calibration between the XRF  $\ln(\text{Ca}/\text{Fe})$  data and the shipboard CaCO<sub>3</sub> data (right), as well as the XRF  $\ln(\text{Ca}/\text{Fe})$  data after calibration to %CaCO<sub>3</sub> (left).

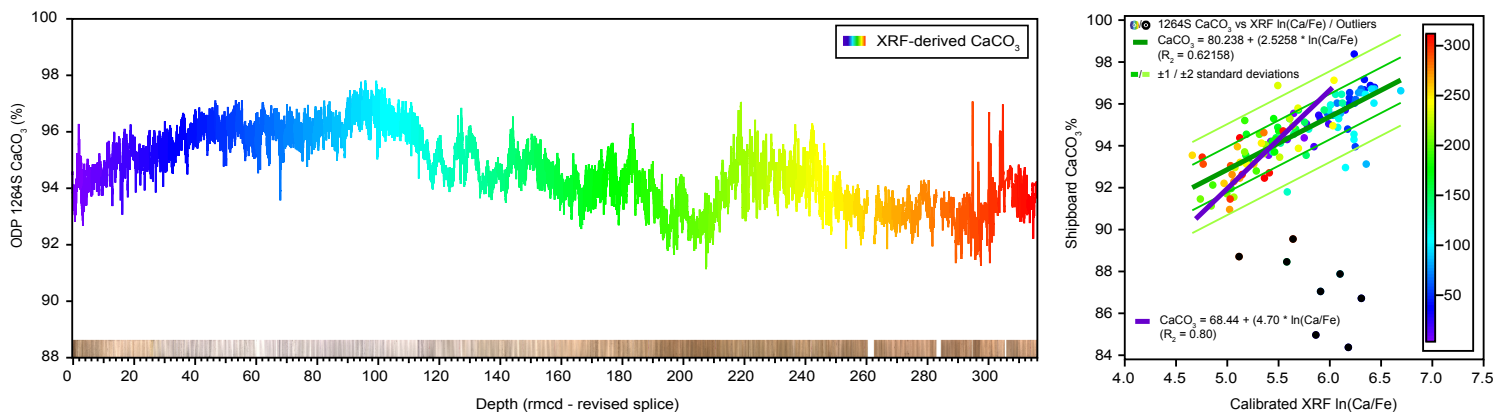



**Supplementary Figure S7:** A) shows the different datasets used to calculate mass accumulation rates at Sites 1264 (shown) and 1265. Please note sedimentation rates are reported in cm/kyr as this unit is used in the calculation of MARs. Elsewhere, we report linear sedimentation rates in m/Myr. B) shows the calibration used to convert shipboard GRA bulk density data to dry bulk density using the MAD dry density data, with the correlation between shipboard GRA bulk density data and the MAD bulk density data.

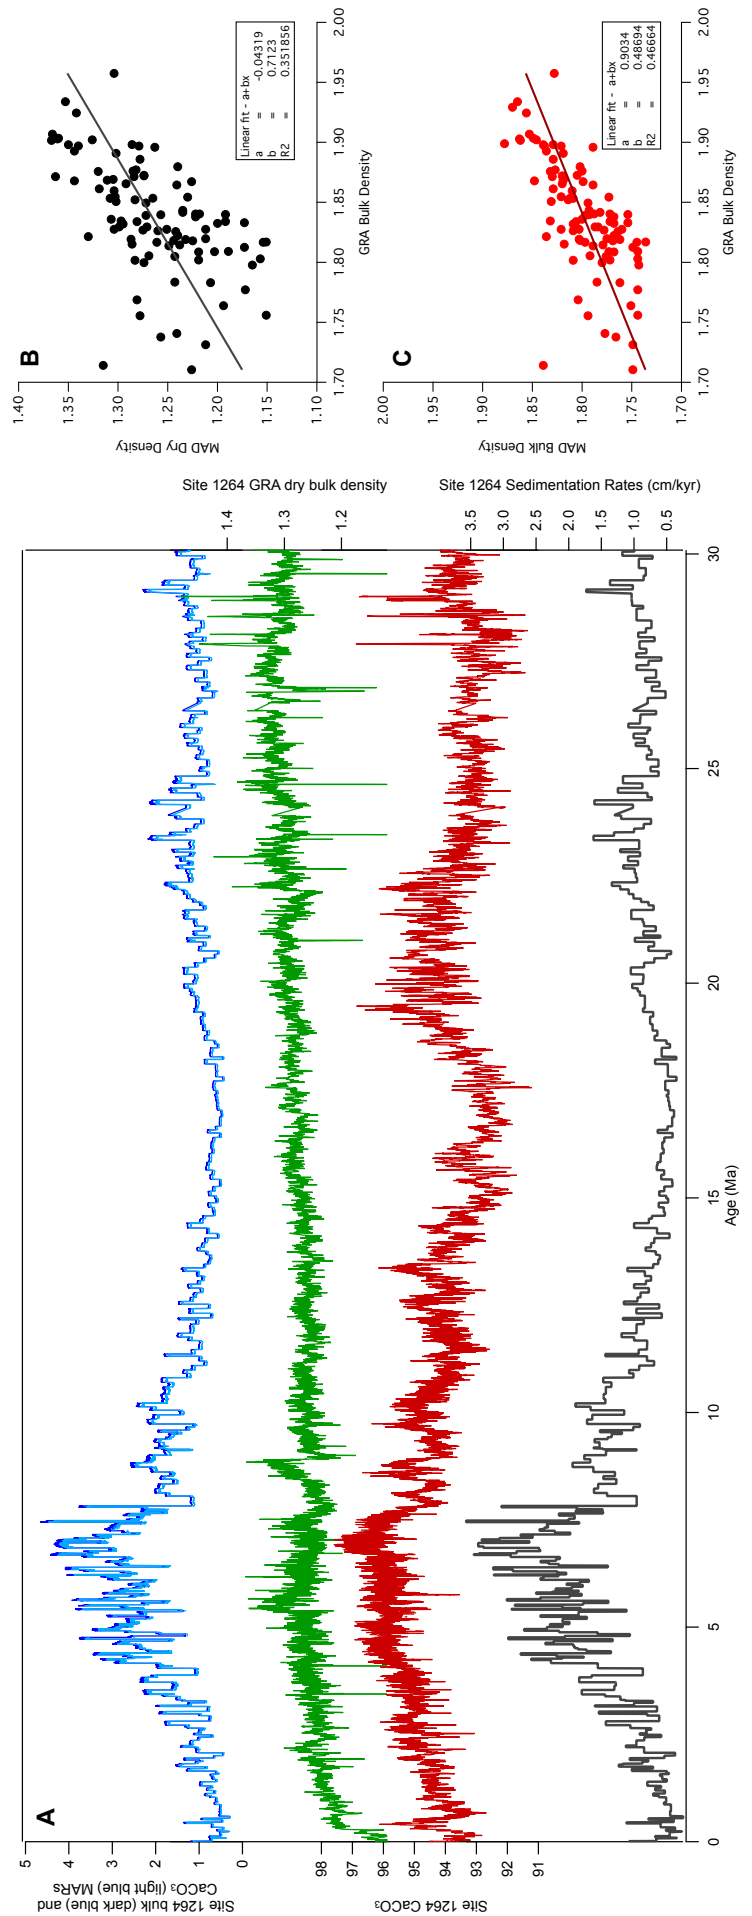

## 1.5. Additional information about age model development

**Supplementary Figure S8:** Showing the shipboard nannofossil and planktonic foraminiferal datums (Shipboard Scientific Party Leg 208, 2004a) and palaeomagnetic datums (Liebrand et al., 2016). A 11<sup>th</sup> order polynomial was applied to selected (i.e. high-quality) datums to obtain a first-order age model to assist with cyclostratigraphic interpretation. Prior to fitting, the datums were weighted accordingly: from 30-10 Ma, datums selected by Liebrand et al., 2016 were weighted at 10 and all others were weighted at 0; from 10-0 Ma, nannofossil datums with a depth error <1 m, between 1-2 m and >2 m were weighted at 10, 3 and 0 respectively, and planktonic foraminiferal datums with a depth error <2 m, between 2-5 m and >5 m were weighted at 10, 3 and 0 respectively. The polynomial was also fitted through the origin. This process was achieved using the CODD AgeDepthFit functions. Datums are listed in Supplementary Table 6.

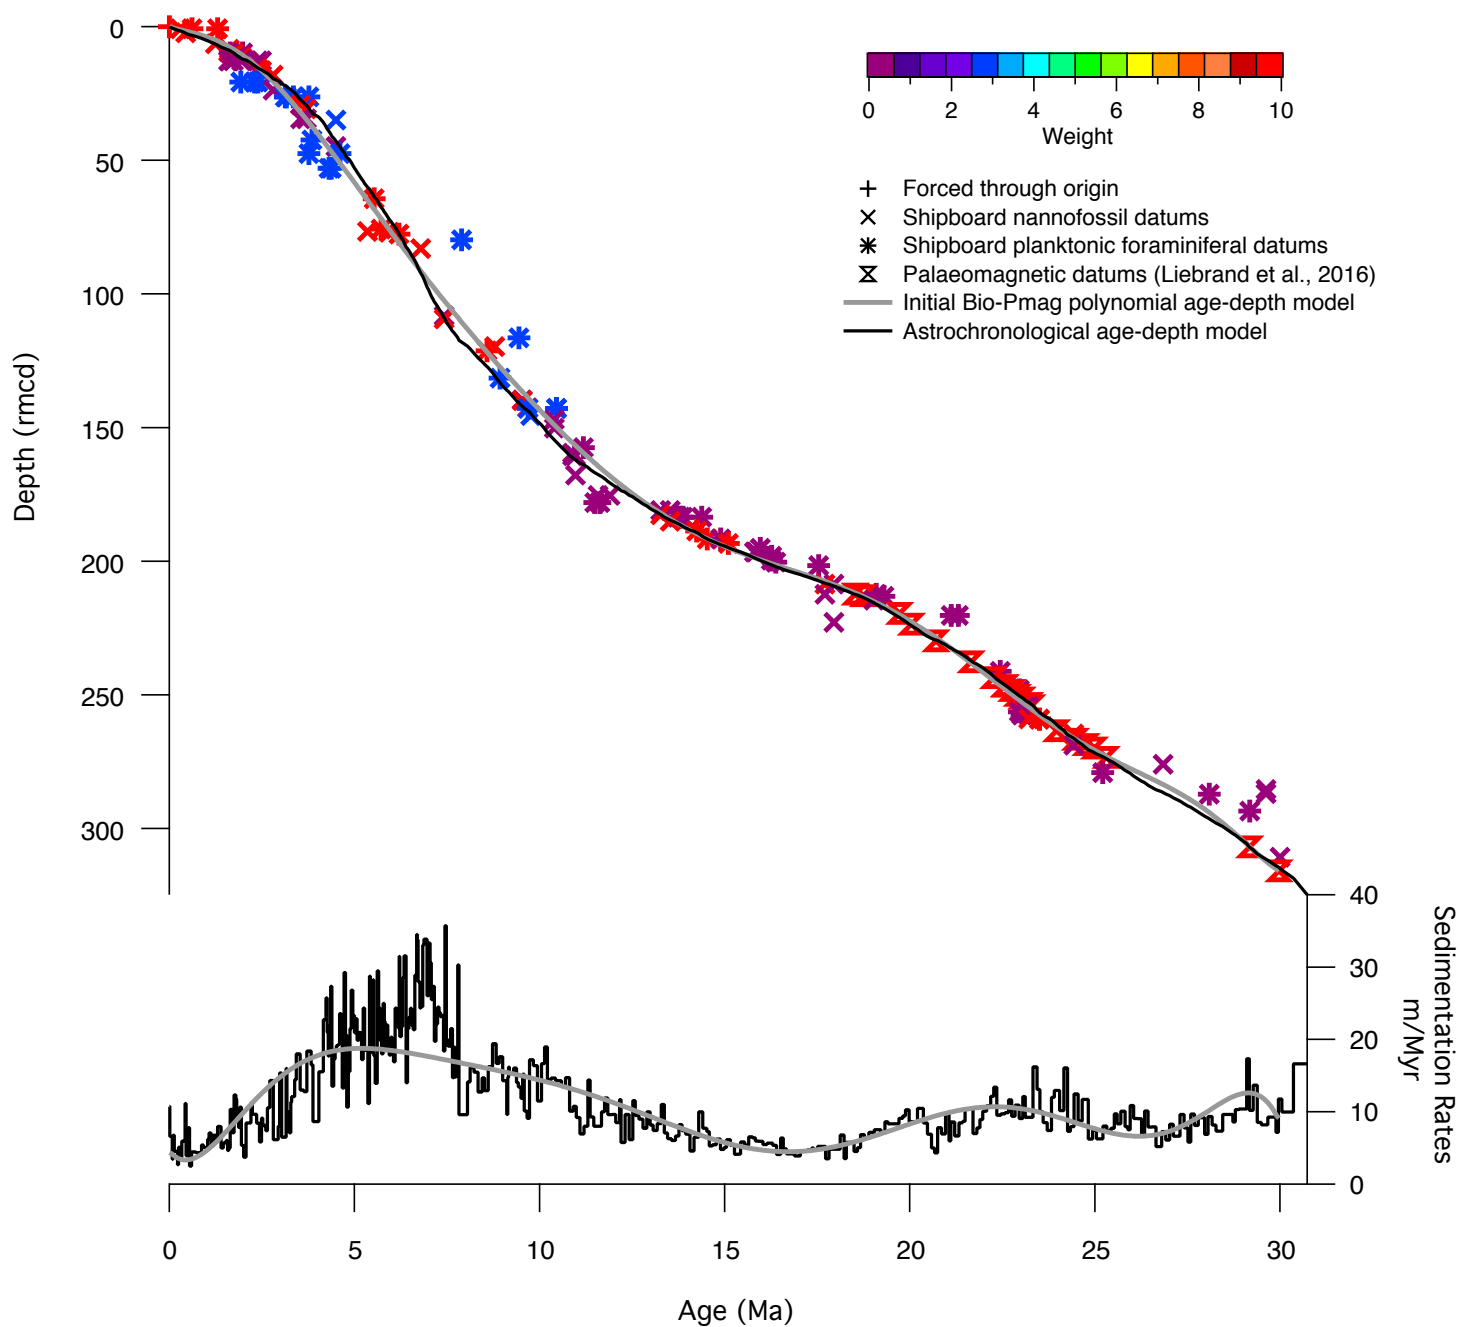



**Supplementary Figure S9:**

%CaCO<sub>3</sub> data on the polynomial age model, with associated wavelet spectra in the time domain of the %CaCO<sub>3</sub> data detrended to remove cycles over 200 kyr (upper wavelet) and cycles over 4 Myr (lower wavelet).

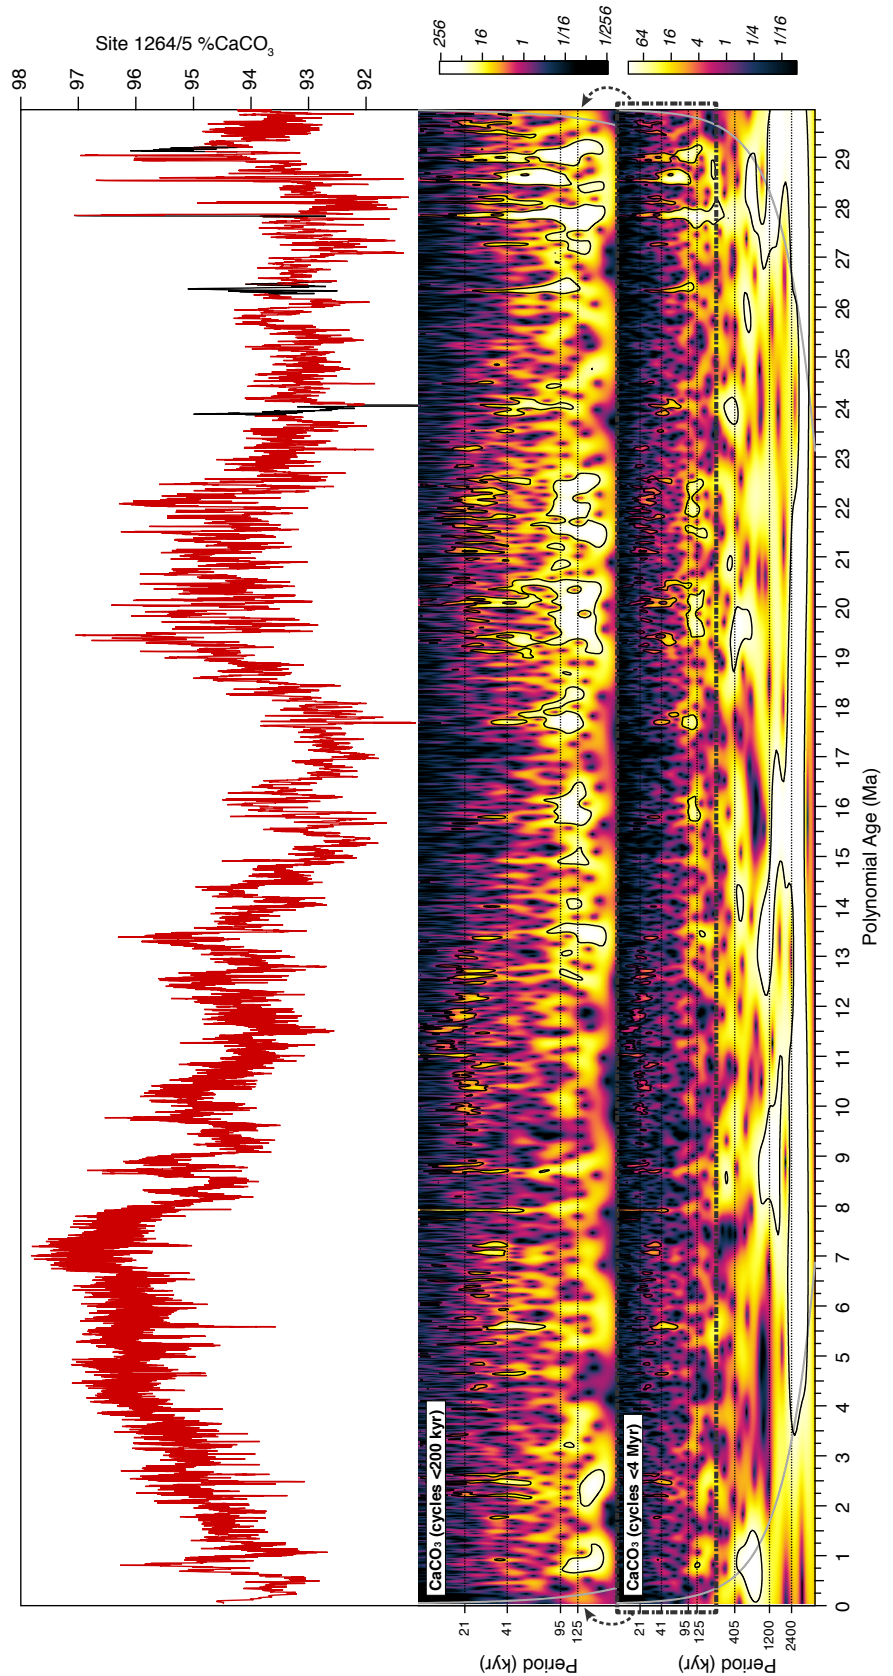

**On the following pages:**

**Supplementary Figure S10:** Oversized figures showing the core photo, sedimentation rates (m/Myr) and %CaCO<sub>3</sub> and benthic  $\delta^{18}\text{O}$  (where available) on depth in the lower panels, compared to %CaCO<sub>3</sub>, benthic  $\delta^{18}\text{O}$  (where available) and the tuning targets on age in the upper panels. Numbered depth-age tie points are also shown in both panels. Each sub figure covers a separate interval: (A) 30-17 Ma (see also Liebrand et al., 2016); (B) 17-8 Ma; (C) 8-3.3 Ma; and (D) 3.3-0.0 Ma (see also Bell et al., 2014).

10.A

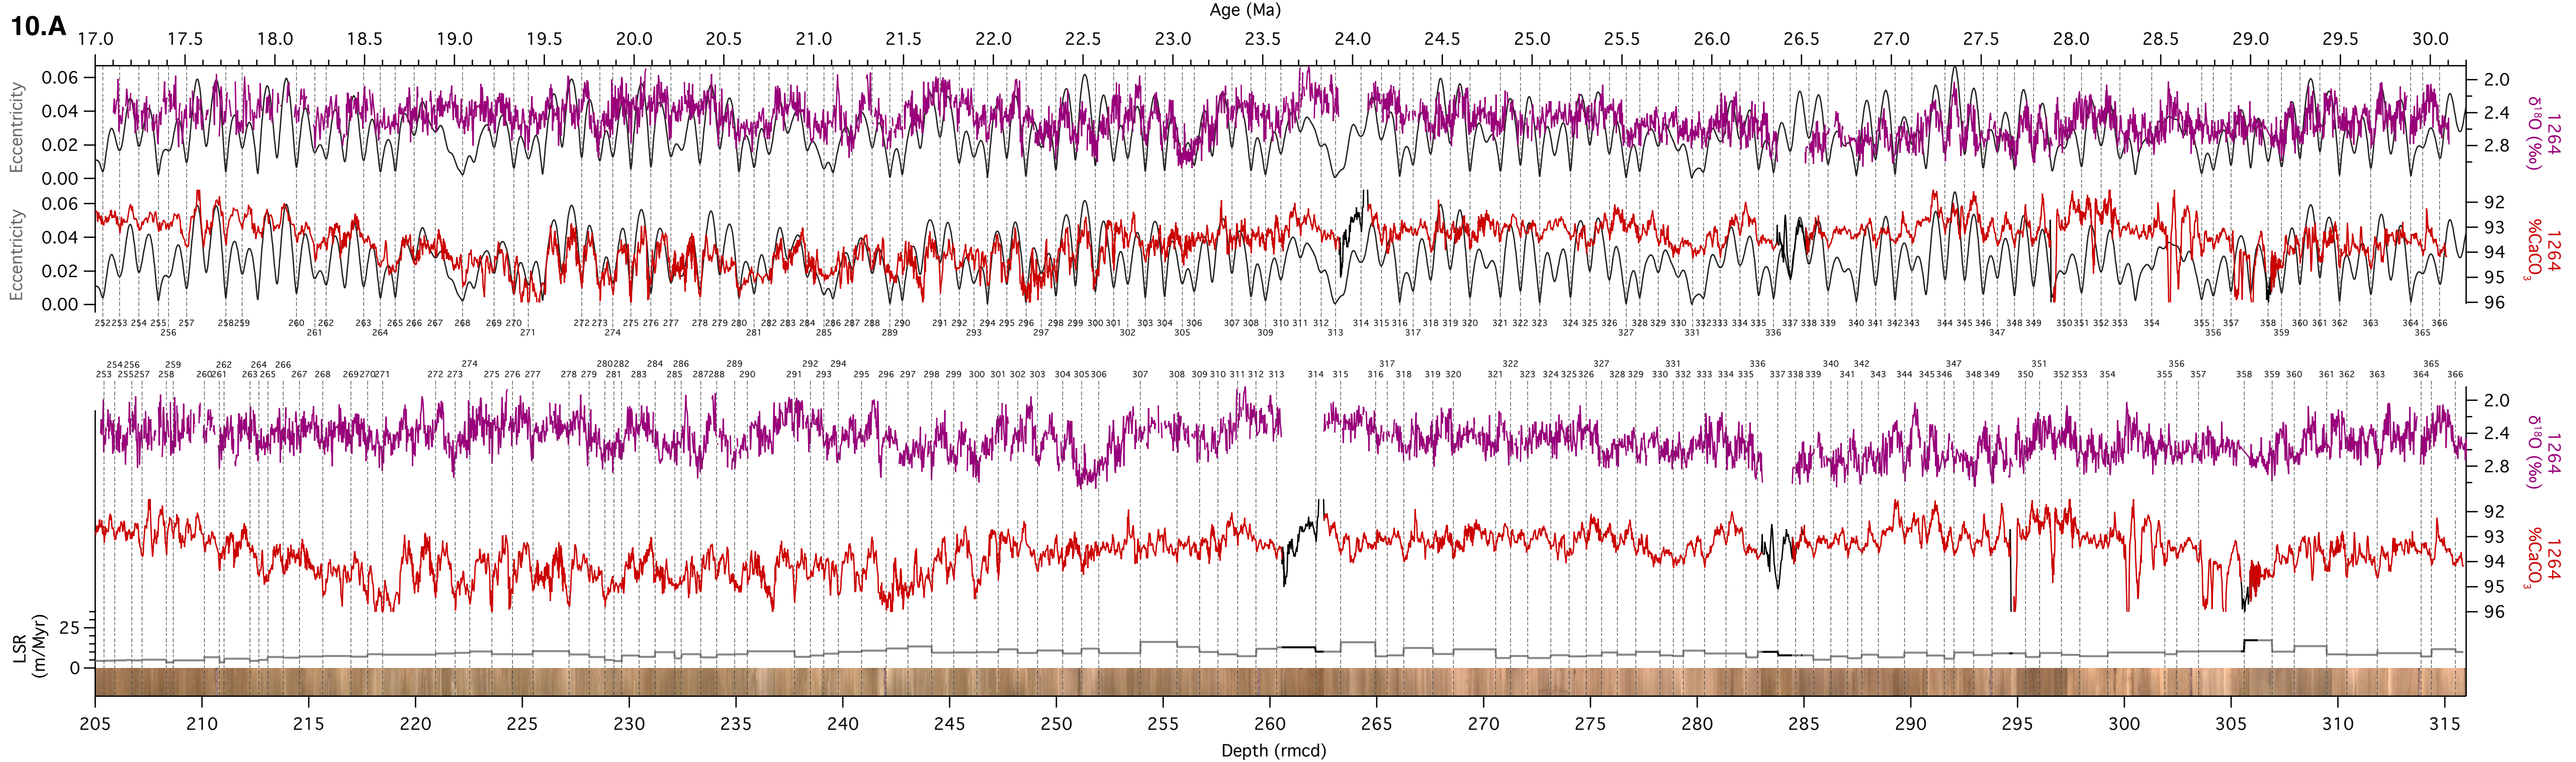



10.B

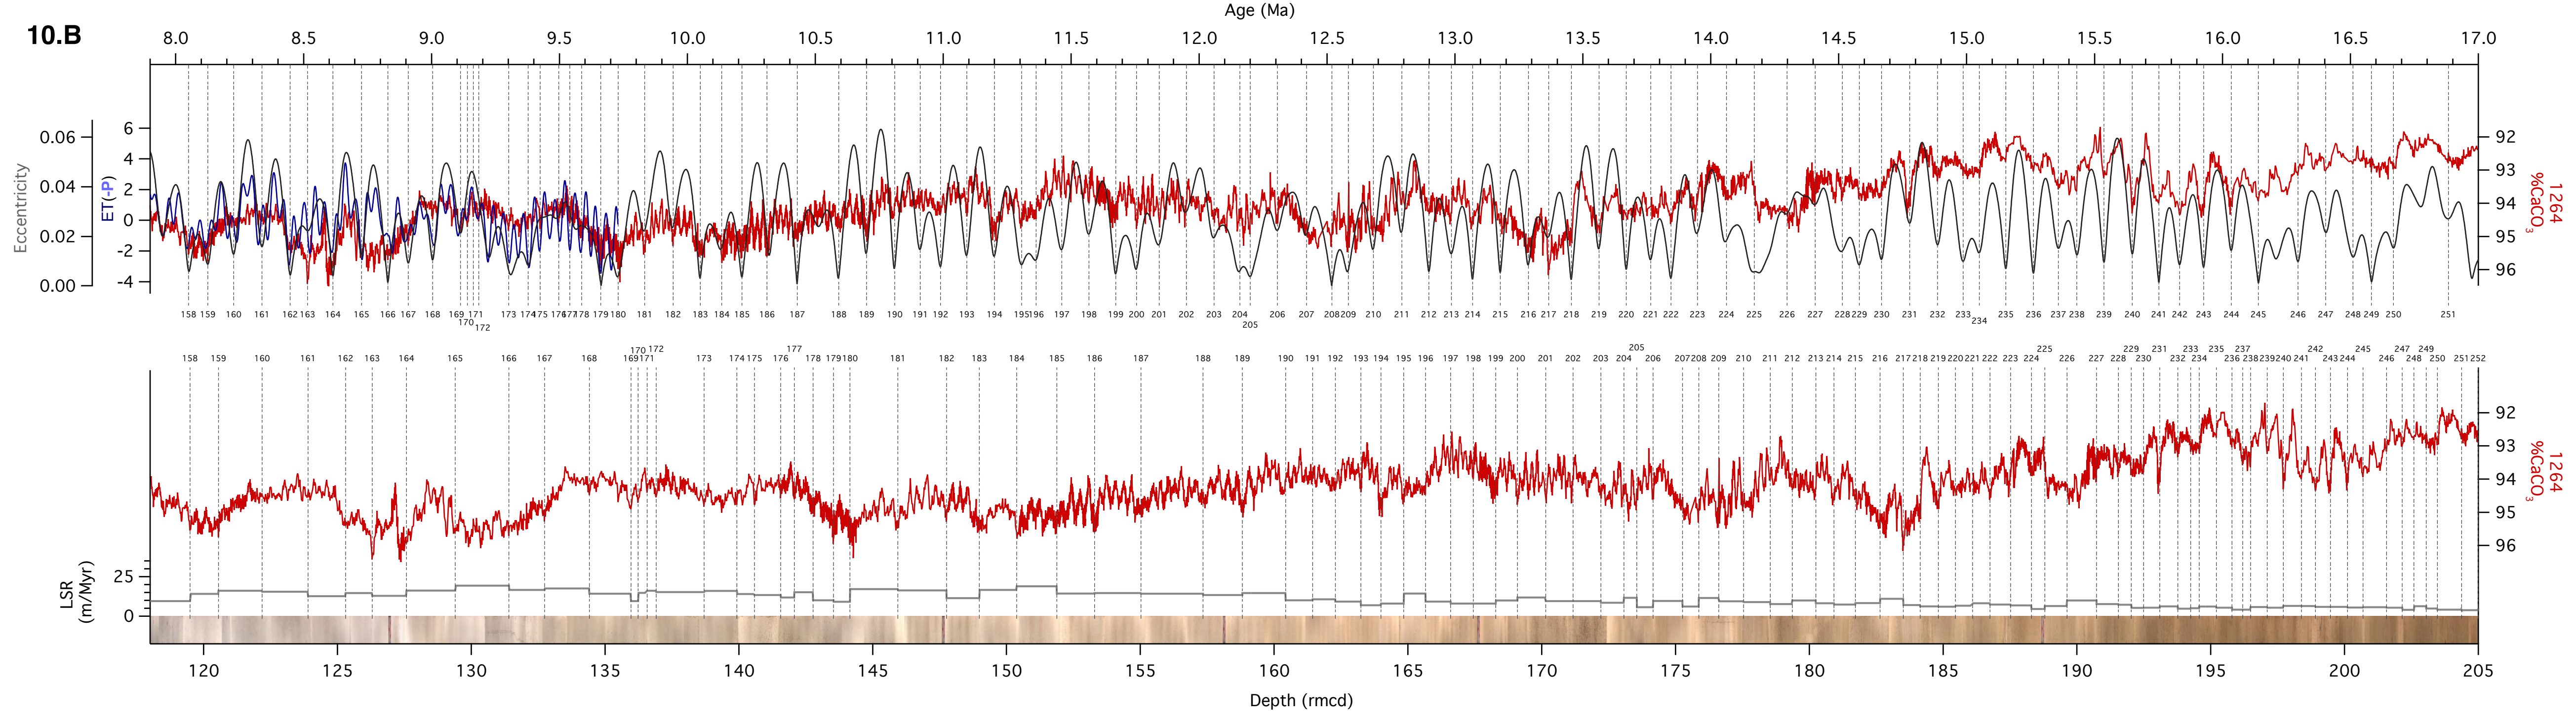

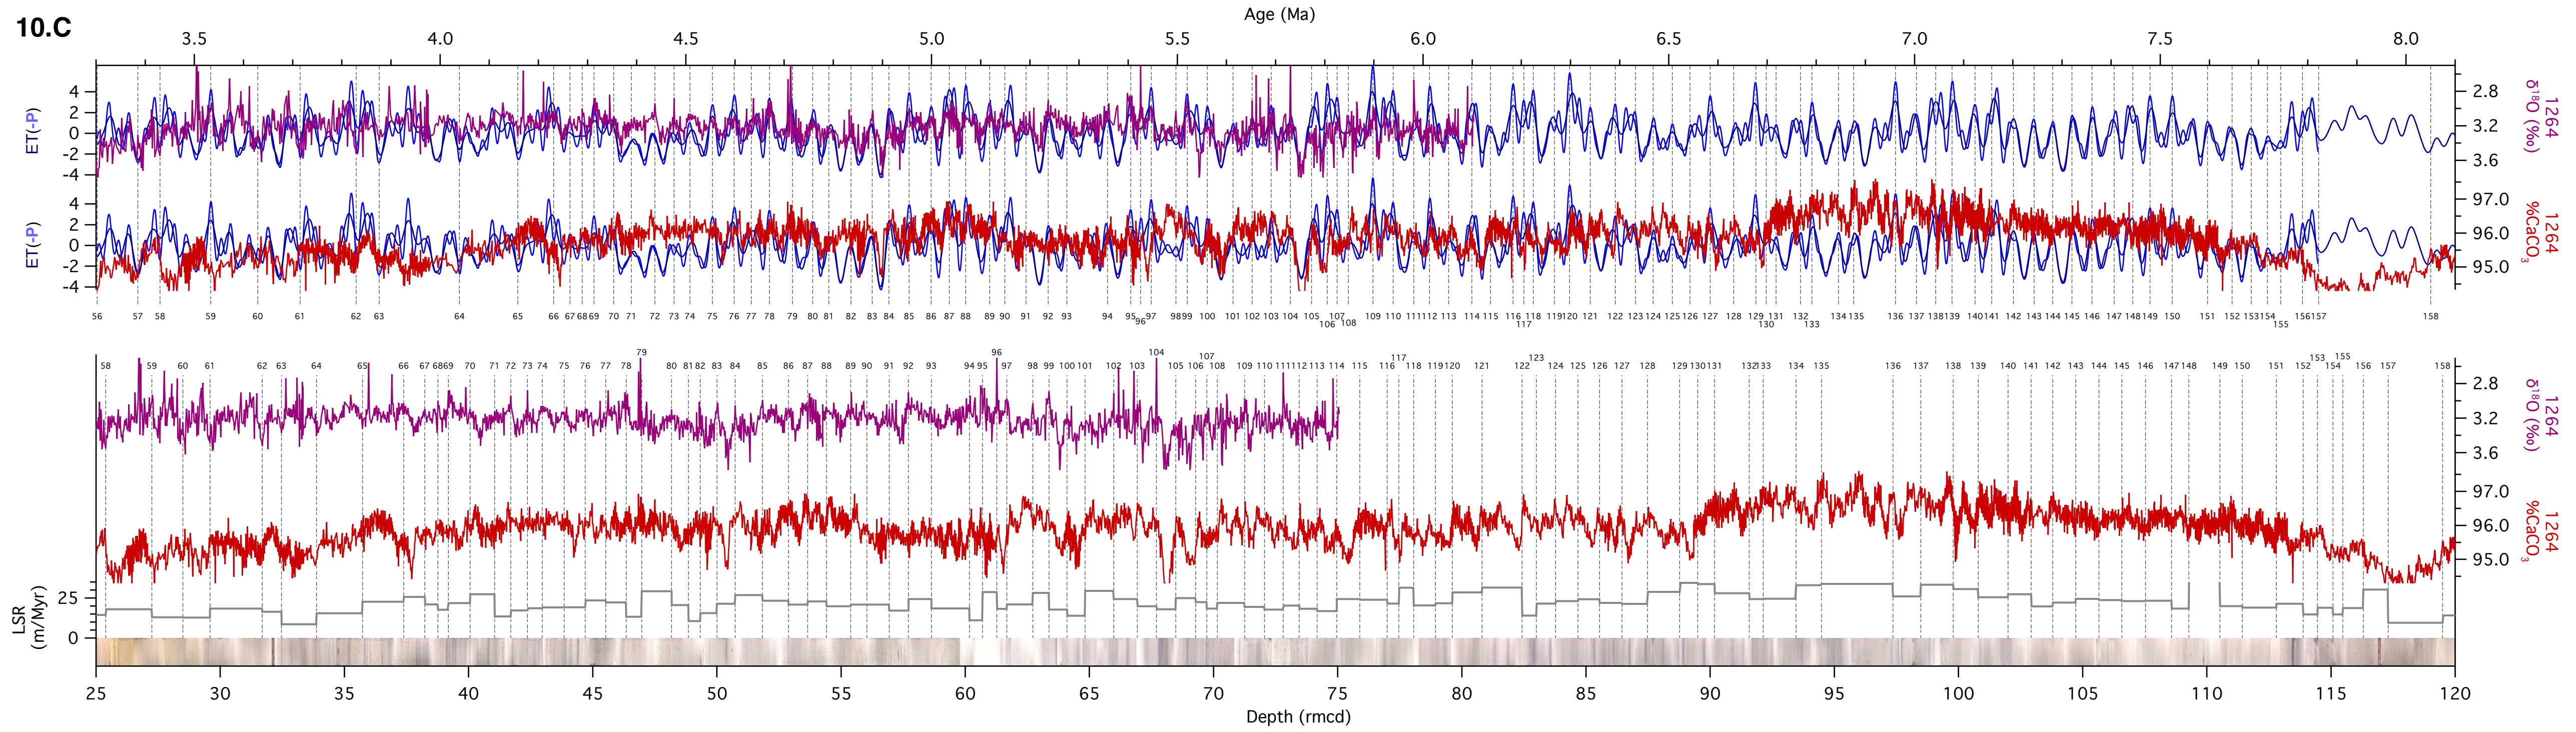



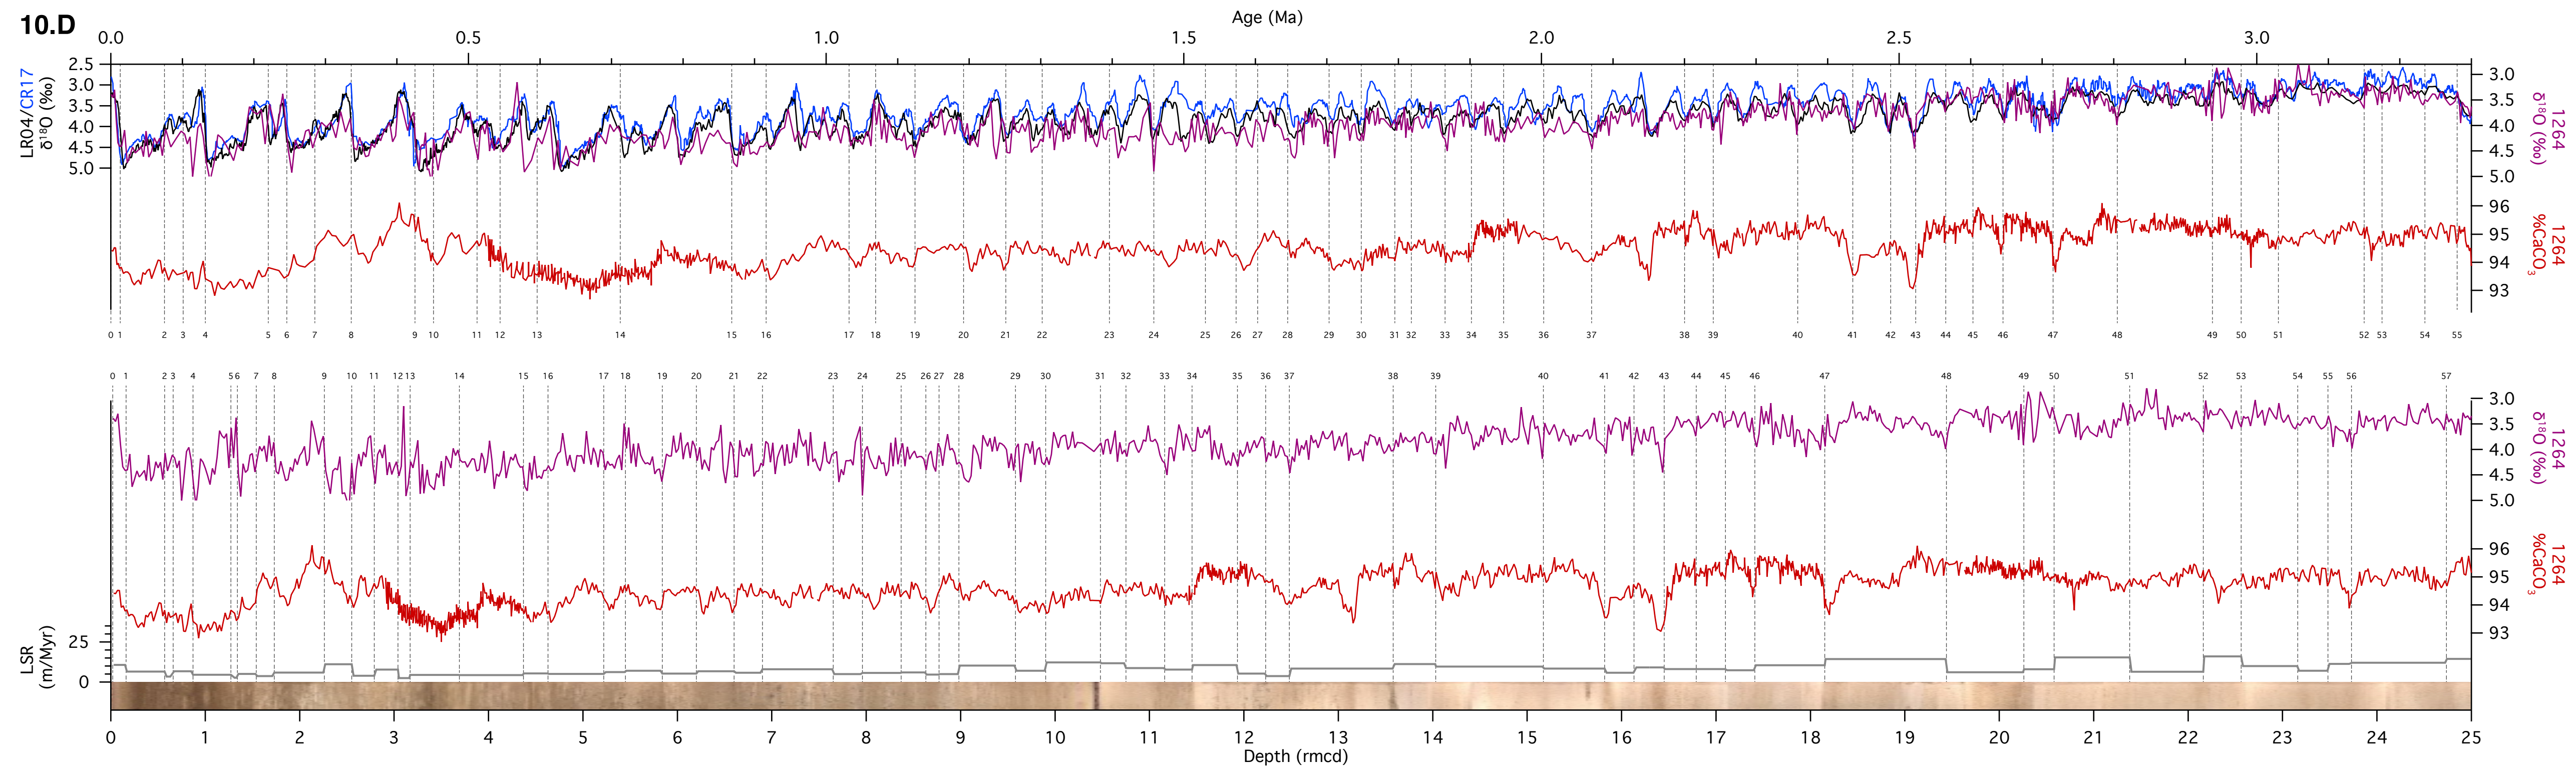

## 1.6. Plio-Pleistocene inverse relationship between benthic $\delta^{18}\text{O}$ and $\%\text{CaCO}_3$

**Supplementary Figure S11:** Showing the antiphase behaviour between benthic  $\delta^{18}\text{O}$  (from Bell et al., 2014) and  $\%\text{CaCO}_3$  A) from 0.0 to 2.5 Ma; B) from 2.5 to 3.3 Ma; C) from 3.3 to 5.33 Ma.

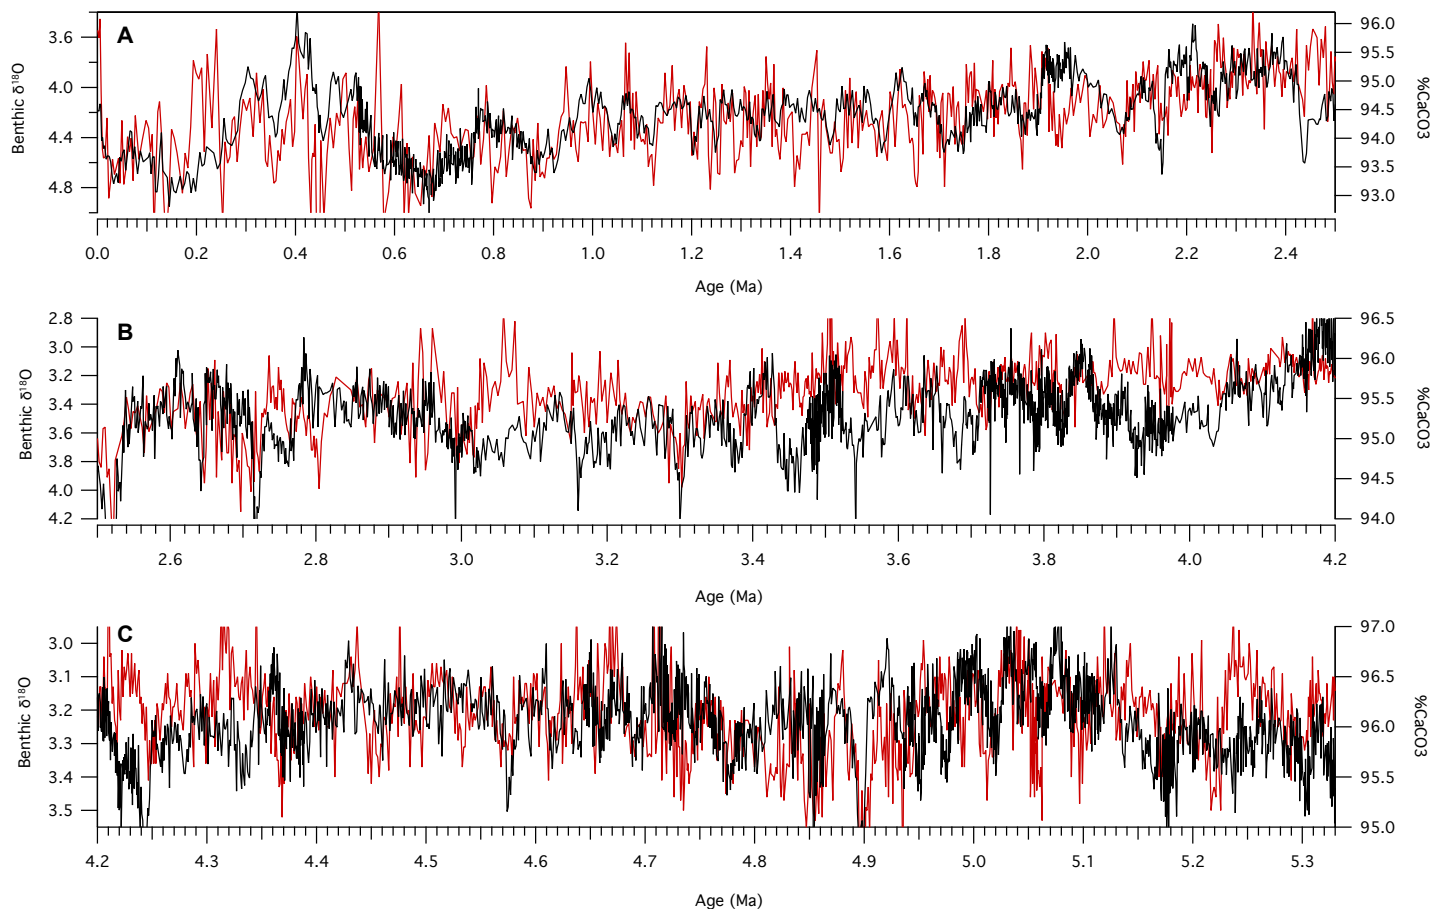



## 1.7. Shipboard bio- and magnetostratigraphic datums updated to the revised depth scale

**Supplementary Table S6:** Selected (i.e. high-quality) bio- and magnetostratigraphic events for Site 1264, updated to the new composite depth scale from this study. For information about weighting, see Supplementary Figure S8.

| Event/Datum                                                                          | Hole | Type   | D21 Depth (armcd) | D21 uncertainty (armcd) | Age GTS 2012 (Ma) | Weight | Source                                    |
|--------------------------------------------------------------------------------------|------|--------|-------------------|-------------------------|-------------------|--------|-------------------------------------------|
| Origin                                                                               | N/A  | Forced | 0.00              | 0.00                    | 0.00              | 10     | Shipboard Scientific Party Leg 208, 2004a |
| <i>B Emiliana huxleyi</i>                                                            | C    | Nanno  | 0.76              | 0.77                    | 0.29              | 10     | Shipboard Scientific Party Leg 208, 2004a |
| <i>T Globoturborotalita obliquus</i>                                                 | C-C  | PForam | 0.76              | 0.76                    | 1.30              | 10     | Shipboard Scientific Party Leg 208, 2004a |
| <i>T Globorotalia tosaensis</i>                                                      | C-C  | PForam | 0.76              | 0.76                    | 0.61              | 10     | Shipboard Scientific Party Leg 208, 2004a |
| <i>T Pseudoemiliana lacunosa</i>                                                     | C    | Nanno  | 2.30              | 0.77                    | 0.44              | 10     | Shipboard Scientific Party Leg 208, 2004a |
| <i>T Large Gephyrocapsa spp.</i>                                                     | A    | Nanno  | 6.41              | 0.25                    | 1.24              | 10     | Shipboard Scientific Party Leg 208, 2004a |
| <i>B Large Gephyrocapsa spp.</i>                                                     | A    | Nanno  | 8.41              | 0.25                    | 1.62              | 10     | Shipboard Scientific Party Leg 208, 2004a |
| <i>T Calcidiscus macintyre</i>                                                       | A    | Nanno  | 9.41              | 0.25                    | 1.60              | 10     | Shipboard Scientific Party Leg 208, 2004a |
| <i>T Globoturborotalita apertura</i>                                                 | B-A  | PForam | 9.84              | 2.47                    | 1.64              | 0      | Shipboard Scientific Party Leg 208, 2004a |
| <i>T Globigerinoides extremus</i>                                                    | B-A  | PForam | 9.84              | 2.47                    | 1.98              | 0      | Shipboard Scientific Party Leg 208, 2004a |
| <i>B Medium Gephyrocapsa spp.</i>                                                    | A    | Nanno  | 9.91              | 0.25                    | 1.73              | 10     | Shipboard Scientific Party Leg 208, 2004a |
| <i>T Discoaster brouweri</i> and <i>D. triradiatus</i>                               | A    | Nanno  | 11.41             | 0.25                    | 1.95              | 10     | Shipboard Scientific Party Leg 208, 2004a |
| <i>T Discoaster pentaradiatus</i>                                                    | B    | Nanno  | 12.76             | 5.40                    | 2.39              | 0      | Shipboard Scientific Party Leg 208, 2004a |
| <i>B Medium Gephyrocapsa spp.</i>                                                    | B    | Nanno  | 12.76             | 5.40                    | 1.73              | 0      | Shipboard Scientific Party Leg 208, 2004a |
| <i>B Large Gephyrocapsa spp.</i>                                                     | B    | Nanno  | 12.76             | 5.40                    | 1.62              | 0      | Shipboard Scientific Party Leg 208, 2004a |
| <i>T Calcidiscus macintyre</i>                                                       | B    | Nanno  | 12.76             | 5.40                    | 1.60              | 0      | Shipboard Scientific Party Leg 208, 2004a |
| <i>T Discoaster brouweri</i> and <i>D. triradiatus</i>                               | B    | Nanno  | 12.76             | 5.40                    | 1.95              | 0      | Shipboard Scientific Party Leg 208, 2004a |
| <i>T Discoaster surculus</i>                                                         | B    | Nanno  | 12.76             | 5.40                    | 2.49              | 0      | Shipboard Scientific Party Leg 208, 2004a |
| <i>T Discoaster pentaradiatus</i>                                                    | A    | Nanno  | 15.67             | 0.36                    | 2.39              | 10     | Shipboard Scientific Party Leg 208, 2004a |
| <i>T Discoaster surculus</i>                                                         | A    | Nanno  | 16.51             | 0.48                    | 2.49              | 10     | Shipboard Scientific Party Leg 208, 2004a |
| <i>T Discoaster tamalis</i>                                                          | A    | Nanno  | 18.13             | 0.40                    | 2.80              | 10     | Shipboard Scientific Party Leg 208, 2004a |
| <i>T Globoturborotalita woodi</i>                                                    | B-A  | PForam | 20.72             | 2.55                    | 2.30              | 3      | Shipboard Scientific Party Leg 208, 2004a |
| <i>T Menardella miocenica</i>                                                        | B-A  | PForam | 20.72             | 2.55                    | 2.39              | 3      | Shipboard Scientific Party Leg 208, 2004a |
| <i>B Globorotalia truncatulinoides</i>                                               | B-A  | PForam | 20.72             | 2.55                    | 1.93              | 3      | Shipboard Scientific Party Leg 208, 2004a |
| <i>T Discoaster tamalis</i>                                                          | B    | Nanno  | 23.70             | 5.54                    | 2.80              | 0      | Shipboard Scientific Party Leg 208, 2004a |
| <i>T Sphaeroidinellopsis seminulina</i>                                              | A-B  | PForam | 26.26             | 3.00                    | 3.16              | 3      | Shipboard Scientific Party Leg 208, 2004a |
| <i>B Globorotalia miocenica</i>                                                      | A-B  | PForam | 26.26             | 3.00                    | 3.77              | 3      | Shipboard Scientific Party Leg 208, 2004a |
| <i>B Globorotalia tosaensis</i>                                                      | A-B  | PForam | 26.26             | 3.00                    | 3.35              | 3      | Shipboard Scientific Party Leg 208, 2004a |
| <i>T Dentoglobigerina altispira</i>                                                  | A-B  | PForam | 26.26             | 3.00                    | 3.13              | 3      | Shipboard Scientific Party Leg 208, 2004a |
| <i>T Sphenolithus spp.</i>                                                           | B    | Nanno  | 29.24             | 0.35                    | 3.54              | 10     | Shipboard Scientific Party Leg 208, 2004a |
| <i>T Reticulofenestra pseudumbilicus</i>                                             | A    | Nanno  | 30.74             | 0.35                    | 3.70              | 10     | Shipboard Scientific Party Leg 208, 2004a |
| <i>T Sphenolithus spp.</i>                                                           | A    | Nanno  | 34.46             | 5.22                    | 3.54              | 0      | Shipboard Scientific Party Leg 208, 2004a |
| <i>T Reticulofenestra pseudumbilicus</i>                                             | B    | Nanno  | 34.46             | 5.22                    | 3.70              | 0      | Shipboard Scientific Party Leg 208, 2004a |
| <i>T Amaurolithus spp.</i> ( <i>Amaurolithus primus</i> NOT <i>tricorniculatus</i> ) | A    | Nanno  | 34.89             | 1.02                    | 4.50              | 3      | Shipboard Scientific Party Leg 208, 2004a |
| <i>T Globorotalia margariae</i>                                                      | A-B  | PForam | 42.40             | 2.71                    | 3.85              | 3      | Shipboard Scientific Party Leg 208, 2004a |
| <i>T Amaurolithus spp.</i> ( <i>Amaurolithus primus</i> NOT <i>tricorniculatus</i> ) | B    | Nanno  | 44.78             | 5.10                    | 4.50              | 0      | Shipboard Scientific Party Leg 208, 2004a |

|                                                   |     |        |        |      |       |    |                                           |
|---------------------------------------------------|-----|--------|--------|------|-------|----|-------------------------------------------|
| <i>T Globorotalia cibaoensis</i>                  | A-B | PForam | 47.50  | 2.39 | 4.61  | 3  | Shipboard Scientific Party Leg 208, 2004a |
| <i>T Globorotalia plesiotumida</i>                | A-B | PForam | 47.50  | 2.39 | 3.77  | 3  | Shipboard Scientific Party Leg 208, 2004a |
| <i>T Globoturborotalita nepenthes</i>             | B-A | PForam | 52.96  | 3.07 | 4.37  | 3  | Shipboard Scientific Party Leg 208, 2004a |
| <i>B Globorotalia crassaformis s.l.</i>           | B-A | PForam | 52.96  | 3.07 | 4.31  | 3  | Shipboard Scientific Party Leg 208, 2004a |
| <i>B Sphaeroidinella dehiscens s.l.</i>           | A   | PForam | 64.34  | 1.19 | 5.53  | 10 | Shipboard Scientific Party Leg 208, 2004a |
| <i>B Globorotalia tumida</i>                      | A   | PForam | 75.74  | 1.57 | 5.72  | 10 | Shipboard Scientific Party Leg 208, 2004a |
| <i>B Ceratolithus acutus</i>                      | A   | Nanno  | 76.60  | 0.30 | 5.35  | 10 | Shipboard Scientific Party Leg 208, 2004a |
| <i>T Nicklithus amplificus</i>                    | A   | Nanno  | 76.91  | 0.01 | 5.94  | 10 | Shipboard Scientific Party Leg 208, 2004a |
| <i>B Globigerinoides conglobatus</i>              | A   | PForam | 77.57  | 0.26 | 6.20  | 10 | Shipboard Scientific Party Leg 208, 2004a |
| <i>B Globoconella conomiozea</i>                  | A-B | PForam | 79.76  | 1.92 | 7.89  | 3  | Shipboard Scientific Party Leg 208, 2004a |
| <i>B Nicklithus amplificus</i>                    | B   | Nanno  | 82.97  | 0.40 | 6.79  | 10 | Shipboard Scientific Party Leg 208, 2004a |
| <i>B Amaurolithus primus</i>                      | B   | Nanno  | 108.17 | 5.22 | 7.42  | 0  | Shipboard Scientific Party Leg 208, 2004a |
| <i>B Amaurolithus primus</i>                      | A   | Nanno  | 109.34 | 0.58 | 7.42  | 10 | Shipboard Scientific Party Leg 208, 2004a |
| <i>B Globorotalia cibaoensis</i>                  | B-A | PForam | 116.44 | 3.02 | 9.44  | 3  | Shipboard Scientific Party Leg 208, 2004a |
| <i>B Paracme Reticulofenestra pseudoumbilicus</i> | A   | Nanno  | 119.71 | 0.26 | 8.79  | 10 | Shipboard Scientific Party Leg 208, 2004a |
| <i>B Globorotalia plesiotumida</i>                | A-B | PForam | 121.24 | 1.78 | 8.58  | 10 | Shipboard Scientific Party Leg 208, 2004a |
| <i>B Globigerinoides extremus</i>                 | A-B | PForam | 131.51 | 2.25 | 8.93  | 3  | Shipboard Scientific Party Leg 208, 2004a |
| <i>T Discoaster neohamatus dominance</i>          | B   | Nanno  | 139.61 | 5.85 | 9.53  | 0  | Shipboard Scientific Party Leg 208, 2004a |
| <i>T Discoaster neohamatus dominance</i>          | A   | Nanno  | 139.90 | 0.17 | 9.53  | 10 | Shipboard Scientific Party Leg 208, 2004a |
| <i>T Catinaster calyculus</i>                     | A   | Nanno  | 142.61 | 0.39 | 9.67  | 10 | Shipboard Scientific Party Leg 208, 2004a |
| <i>T Paragloborotalia mayeri (subtropical)</i>    | A-B | PForam | 142.78 | 2.70 | 10.46 | 3  | Shipboard Scientific Party Leg 208, 2004a |
| <i>B Globorotalia juanai</i>                      | A-B | PForam | 142.78 | 2.70 | 9.69  | 3  | Shipboard Scientific Party Leg 208, 2004a |
| <i>T Paragloborotalia mayeri</i>                  | A-B | PForam | 142.78 | 2.70 | 10.46 | 3  | Shipboard Scientific Party Leg 208, 2004a |
| <i>B Discoaster neohamatus</i>                    | A   | Nanno  | 145.49 | 1.10 | 9.76  | 3  | Shipboard Scientific Party Leg 208, 2004a |
| <i>B Discoaster bellus gr. (= B D. hamatus)</i>   | A   | Nanno  | 146.99 | 0.40 | 10.40 | 0  | Shipboard Scientific Party Leg 208, 2004a |
| <i>B Discoaster bellus gr. (= B D. hamatus)</i>   | B   | Nanno  | 150.20 | 4.75 | 10.40 | 0  | Shipboard Scientific Party Leg 208, 2004a |
| <i>B Globigerina apertura</i>                     | B-A | PForam | 157.47 | 2.52 | 11.18 | 0  | Shipboard Scientific Party Leg 208, 2004a |
| <i>B Catinaster coalitus</i>                      | A   | Nanno  | 159.57 | 0.20 | 10.89 | 0  | Shipboard Scientific Party Leg 208, 2004a |
| <i>T Coccolithus miopelagicus</i>                 | B   | Nanno  | 160.53 | 5.58 | 10.97 | 0  | Shipboard Scientific Party Leg 208, 2004a |
| <i>B Catinaster coalitus</i>                      | B   | Nanno  | 160.53 | 5.58 | 10.89 | 0  | Shipboard Scientific Party Leg 208, 2004a |
| <i>T Coccolithus miopelagicus</i>                 | A   | Nanno  | 167.73 | 0.35 | 10.97 | 0  | Shipboard Scientific Party Leg 208, 2004a |
| <i>TC Discoaster kugleri</i>                      | A   | Nanno  | 175.38 | 5.18 | 11.58 | 0  | Shipboard Scientific Party Leg 208, 2004a |
| <i>BC Discoaster kugleri</i>                      | A   | Nanno  | 175.38 | 5.18 | 11.90 | 0  | Shipboard Scientific Party Leg 208, 2004a |
| <i>B Globoturborotalita nepenthes</i>             | B-A | PForam | 178.07 | 2.50 | 11.63 | 0  | Shipboard Scientific Party Leg 208, 2004a |
| <i>B Globigerina decoraperta</i>                  | B-A | PForam | 178.07 | 2.50 | 11.49 | 0  | Shipboard Scientific Party Leg 208, 2004a |
| <i>T Sphenolithus heteromorphus</i>               | B   | Nanno  | 181.03 | 5.48 | 13.53 | 0  | Shipboard Scientific Party Leg 208, 2004a |
| <i>B Triquetrorhabdulus rugosus</i>               | B   | Nanno  | 181.03 | 5.48 | 13.27 | 0  | Shipboard Scientific Party Leg 208, 2004a |
| <i>B Triquetrorhabdulus rugosus</i>               | A   | Nanno  | 182.62 | 0.45 | 13.27 | 10 | Shipboard Scientific Party Leg 208, 2004a |
| <i>B Menardella praemenardii</i>                  | A-B | PForam | 183.54 | 2.97 | 14.38 | 0  | Shipboard Scientific Party Leg 208, 2004a |
| <i>T Menardella archeomenardii</i>                | A-B | PForam | 183.54 | 2.97 | 13.87 | 0  | Shipboard Scientific Party Leg 208, 2004a |
| <i>T Fohsella peripheroronda</i>                  | A-B | PForam | 183.54 | 2.97 | 13.80 | 0  | Shipboard Scientific Party Leg 208, 2004a |
| <i>T Hirsutella praescitula</i>                   | A-B | PForam | 183.54 | 2.97 | 13.73 | 0  | Shipboard Scientific Party Leg 208, 2004a |



|                                         |     |         |        |      |        |    |                                           |
|-----------------------------------------|-----|---------|--------|------|--------|----|-------------------------------------------|
| <i>T Sphenolithus heteromorphus</i>     | A   | Nanno   | 185.06 | 0.40 | 13.53  | 10 | Shipboard Scientific Party Leg 208, 2004a |
| <i>B Fohsella peripheroacuta</i>        | B-A | PForam  | 188.67 | 2.16 | 14.24  | 10 | Shipboard Scientific Party Leg 208, 2004a |
| <i>T Praeorbulina sicana</i>            | A   | PForam  | 191.62 | 0.79 | 14.53  | 10 | Shipboard Scientific Party Leg 208, 2004a |
| <i>T Praeorbulina circularis</i>        | A   | PForam  | 191.62 | 0.79 | 14.89  | 0  | Shipboard Scientific Party Leg 208, 2004a |
| <i>B Orbulina spp.</i>                  | A   | PForam  | 193.29 | 0.88 |        | 0  | Shipboard Scientific Party Leg 208, 2004a |
| <i>B Orbulina suturalis</i>             | A   | PForam  | 193.29 | 0.88 | 15.1   | 10 | Shipboard Scientific Party Leg 208, 2004a |
| <i>B Praeorbulina circularis</i>        | A   | PForam  | 195.12 | 0.94 | 15.96  | 0  | Shipboard Scientific Party Leg 208, 2004a |
| <i>B Discoaster signus gr.</i>          | A   | Nanno   | 196.55 | 0.40 | 15.85  | 0  | Shipboard Scientific Party Leg 208, 2004a |
| <i>T Acme Discoaster deflandrei</i>     | A   | Nanno   | 196.55 | 0.40 | 15.8   | 0  | Shipboard Scientific Party Leg 208, 2004a |
| <i>B Praeorbulina glomerosa</i>         | A-B | PForam  | 198.12 | 0.54 | 16.27  | 0  | Shipboard Scientific Party Leg 208, 2004a |
| <i>B Menardella archeomenardii</i>      | A-B | PForam  | 199.56 | 0.48 | 16.26  | 0  | Shipboard Scientific Party Leg 208, 2004a |
| <i>B Praeorbulina sicana</i>            | B-A | PForam  | 200.31 | 0.27 | 16.38  | 0  | Shipboard Scientific Party Leg 208, 2004a |
| <i>T Catapsydrax dissimilis</i>         | B-A | PForam  | 201.63 | 0.09 | 17.54  | 0  | Shipboard Scientific Party Leg 208, 2004a |
| <i>T Sphenolithus belemnus</i>          | A   | Nanno   | 208.53 | 0.40 | 17.95  | 0  | Shipboard Scientific Party Leg 208, 2004a |
| <i>B Sphenolithus heteromorphus</i>     | A   | Nanno   | 208.53 | 0.40 | 17.71  | 10 | Shipboard Scientific Party Leg 208, 2004a |
| <i>C5En (o)</i>                         | N/A | PmagL16 | 212.26 | 0.18 | 18.524 | 10 | Liebrand et al., 2016                     |
| <i>B Sphenolithus heteromorphus</i>     | B   | Nanno   | 212.34 | 5.33 | 17.71  | 0  | Shipboard Scientific Party Leg 208, 2004a |
| <i>T Globoquadrina binaiensis</i>       | B-A | PForam  | 212.38 | 0.73 | 19.09  | 0  | Shipboard Scientific Party Leg 208, 2004a |
| <i>C6n (y)</i>                          | N/A | PmagL16 | 212.91 | 0.41 | 18.748 | 10 | Liebrand et al., 2016                     |
| <i>B Globoquadrina binaiensis</i>       | A-B | PForam  | 213.13 | 0.02 | 19.3   | 0  | Shipboard Scientific Party Leg 208, 2004a |
| <i>B Sphenolithus belemnus</i>          | A   | Nanno   | 214.53 | 0.40 | 19.03  | 0  | Shipboard Scientific Party Leg 208, 2004a |
| <i>C6n (o)</i>                          | N/A | PmagL16 | 219.48 | 1.18 | 19.722 | 10 | Liebrand et al., 2016                     |
| <i>T Paragloborotalia kugleri</i>       | B-A | PForam  | 220.29 | 2.79 | 21.12  | 0  | Shipboard Scientific Party Leg 208, 2004a |
| <i>T Paragloborotalia pseudokugleri</i> | B-A | PForam  | 220.29 | 2.79 | 21.31  | 0  | Shipboard Scientific Party Leg 208, 2004a |
| <i>T Sphenolithus belemnus</i>          | B   | Nanno   | 222.83 | 5.16 | 17.95  | 0  | Shipboard Scientific Party Leg 208, 2004a |
| <i>C6An.1n (y)</i>                      | N/A | PmagL16 | 223.53 | 0.48 | 20.04  | 10 | Liebrand et al., 2016                     |
| <i>C6An.2n (o)</i>                      | N/A | PmagL16 | 229.75 | 0.29 | 20.709 | 10 | Liebrand et al., 2016                     |
| <i>C6AAr.2n (y)</i>                     | N/A | PmagL16 | 237.60 | 0.61 | 21.659 | 10 | Liebrand et al., 2016                     |
| <i>B Globoquadrina dehiscens</i>        | B-A | PForam  | 241.22 | 3.14 | 22.44  | 0  | Shipboard Scientific Party Leg 208, 2004a |
| <i>C6Bn.2n (o)</i>                      | N/A | PmagL16 | 243.51 | 0.35 | 22.268 | 10 | Liebrand et al., 2016                     |
| <i>C6Cn.1n (y)</i>                      | N/A | PmagL16 | 246.52 | 0.58 | 22.564 | 10 | Liebrand et al., 2016                     |
| <i>C6Cn.1n (y)</i>                      | N/A | PmagL16 | 246.72 | 0.22 | 22.564 | 10 | Liebrand et al., 2016                     |
| <i>B Globigerinoides trilobus s.l.</i>  | A-B | PForam  | 248.12 | 0.68 | 22.96  | 0  | Shipboard Scientific Party Leg 208, 2004a |
| <i>C6Cn.1n (o)</i>                      | N/A | PmagL16 | 248.30 | 0.17 | 22.754 | 10 | Liebrand et al., 2016                     |
| <i>C6Cn.2n (y)</i>                      | N/A | PmagL16 | 250.19 | 0.30 | 22.902 | 10 | Liebrand et al., 2016                     |
| <i>C6Cn.2n (o)</i>                      | N/A | PmagL16 | 251.18 | 0.10 | 23.03  | 10 | Liebrand et al., 2016                     |
| <i>C6Cn.3n (y)</i>                      | N/A | PmagL16 | 253.17 | 0.15 | 23.233 | 10 | Liebrand et al., 2016                     |
| <i>C6Cn.3n (o)</i>                      | N/A | PmagL16 | 254.01 | 0.11 | 23.295 | 10 | Liebrand et al., 2016                     |
| <i>B Sphenolithus delphix</i>           | B   | Nanno   | 254.45 | 5.66 | 23.21  | 0  | Shipboard Scientific Party Leg 208, 2004a |
| <i>T Sphenolithus delphix</i>           | B   | Nanno   | 254.45 | 5.66 | 23.11  | 0  | Shipboard Scientific Party Leg 208, 2004a |
| <i>T Sphenolithus delphix</i>           | A   | Nanno   | 256.18 | 0.42 | 23.11  | 10 | Shipboard Scientific Party Leg 208, 2004a |
| <i>B Paragloborotalia kugleri</i>       | A   | PForam  | 256.29 | 0.53 | 22.96  | 0  | Shipboard Scientific Party Leg 208, 2004a |
| <i>T Globigerina euapertura</i>         | A   | PForam  | 257.58 | 0.75 | 23.03  | 0  | Shipboard Scientific Party Leg 208, 2004a |
| <i>B Sphenolithus delphix</i>           | A   | Nanno   | 259.00 | 0.10 | 23.21  | 10 | Shipboard Scientific Party Leg 208, 2004a |

|                                                 |     |         |        |      |        |    |                                           |
|-------------------------------------------------|-----|---------|--------|------|--------|----|-------------------------------------------|
| <i>T Tenuitella gemma</i>                       | A   | PForam  | 259.08 | 0.75 | 23.5   | 10 | Shipboard Scientific Party Leg 208, 2004a |
| <i>B Globigerinoides primordius</i><br>(common) | A   | PForam  | 259.08 | 0.75 | 23.5   | 10 | Shipboard Scientific Party Leg 208, 2004a |
| <i>C7n.1n (y)</i>                               | N/A | PmagL16 | 263.43 | 1.75 | 23.962 | 10 | Liebrand et al., 2016                     |
| <i>T Sphenolithus ciperoensis</i>               | B   | Nanno   | 264.64 | 0.15 | 24.43  | 10 | Shipboard Scientific Party Leg 208, 2004a |
| <i>C7n.2n (o)</i>                               | N/A | PmagL16 | 266.62 | 0.06 | 24.474 | 10 | Liebrand et al., 2016                     |
| <i>C7An (y)</i>                                 | N/A | PmagL16 | 268.58 | 0.09 | 24.761 | 10 | Liebrand et al., 2016                     |
| <i>T Sphenolithus ciperoensis</i>               | A   | Nanno   | 268.80 | 8.24 | 24.43  | 0  | Shipboard Scientific Party Leg 208, 2004a |
| <i>C7An (o)</i>                                 | N/A | PmagL16 | 269.88 | 0.51 | 24.984 | 10 | Liebrand et al., 2016                     |
| <i>C8n.2n (y)</i>                               | N/A | PmagL16 | 273.38 | 1.26 | 25.304 | 10 | Liebrand et al., 2016                     |
| <i>T Sphenolithus distentus</i>                 | B   | Nanno   | 275.97 | 0.20 | 26.84  | 0  | Shipboard Scientific Party Leg 208, 2004a |
| <i>B Paragloborotalia pseudokugleri</i>         | A   | PForam  | 279.10 | 2.06 | 25.21  | 0  | Shipboard Scientific Party Leg 208, 2004a |
| <i>B Sphenolithus ciperoensis</i>               | A   | Nanno   | 285.41 | 4.26 | 29.62  | 0  | Shipboard Scientific Party Leg 208, 2004a |
| <i>B Sphenolithus ciperoensis</i>               | B   | Nanno   | 286.91 | 0.35 | 29.62  | 0  | Shipboard Scientific Party Leg 208, 2004a |
| <i>T Chiloguembelina cubensis</i><br>(common)   | B   | PForam  | 287.13 | 5.10 | 28.09  | 0  | Shipboard Scientific Party Leg 208, 2004a |
| <i>B "Globigerina" angulisuturalis</i>          | B-A | PForam  | 293.46 | 1.23 | 29.18  | 0  | Shipboard Scientific Party Leg 208, 2004a |
| <i>C11n.1n (y)</i>                              | N/A | PmagL16 | 306.88 | 0.06 | 29.183 | 10 | Liebrand et al., 2016                     |
| <i>B Sphenolithus distentus</i>                 | A   | Nanno   | 310.71 | 5.28 | 30     | 0  | Shipboard Scientific Party Leg 208, 2004a |
| <i>C11n.2n (o)</i>                              | N/A | PmagL16 | 315.81 | 2.07 | 29.97  | 10 | Liebrand et al., 2016                     |
