# Supplementary material for: Climate, cryosphere and carbon cycle controls on Southeast Atlantic orbital-scale carbonate deposition since the Oligocene (30–0 Ma)
Source: Copernicus journal article supplement (doi:10.5194/cp-17-2091-2021), 2021-10-15
Supplement: Supplementary file 1 [file SI Table S2 - Site 1264 Offsets.xlsx]

## Sheet: Revised offsets Hole 1264A
Key	BOLD = changes compared to shipboard and Liebrand et al., 2016						Italics = shipboard splice, but shifted to accommodate new offsets higher in the section.
Core	Depth		Shipboard Offset	Revised Offset L16	Revised Offset D21 (this study)		Change in offset ship-D21 (this study)	Change in offset L16-D21 (this study)		shipboard composite depth	L16 Revised composite depth	D21 (this study) Revised composite depth
	(mbsf)		(m)	(m)	(m)		(m)	(m)		(mcd)	(rmcd - Liebrand et al., 2016)	(rmcd - this study)
208-1264A-
1H	0		2.96	2.96	2.96		0	0		2.96	2.96	2.96
2H	9.3		4.33	4.33	4.33		0	0		13.63	13.63	13.63
3H	18.8		5.89	5.89	5.89		0	0		24.69	24.69	24.69
4H	28.3		7.06	7.06	7.21		-0.15	-0.15		35.36	35.36	35.51
5H	37.8		8.35	8.35	8.68		-0.33	-0.33		46.15	46.15	46.48
6H	47.3		10.41	10.41	10.02		0.39	0.39		57.71	57.71	57.32
7H	56.8		11.44	11.44	11.05		0.39	0.39		68.24	68.24	67.85
8H	66.3		13.12	13.12	12.87		0.25	0.25		79.42	79.42	79.17
9H	75.8		14.37	14.37	13.88		0.49	0.49		90.17	90.17	89.68
10H	85.3		16.31	16.31	14.44		1.87	1.87		101.61	101.61	99.74
11H	94.8		16.61	16.61	14.7		1.91	1.91		111.41	111.41	109.5
12H	104.3		17.25	17.25	15.2		2.05	2.05		121.55	121.55	119.5
13H	113.8		18.84	18.84	16.79		2.05	2.05		132.64	132.64	130.59
14H	123.3		18.89	18.89	16.89		2	2		142.19	142.19	140.19
15H	132.8		19.84	19.84	17.88		1.96	1.96		152.64	152.64	150.68
16H	142.3		19.84	19.84	17.88		1.96	1.96		162.14	162.14	160.18
17H	151.8		21.39	21.39	19.43		1.96	1.96		173.19	173.19	171.23
18H	161.3		21.92	21.92	19.96		1.96	1.96		183.22	183.22	181.26
19H	170.8		23.91	23.91	21.95		1.96	1.96		194.71	194.71	192.75
20H	180.3		24.89	24.89	22.93		1.96	1.96		205.19	205.19	203.23
21H	189.8		25.95	25.89	23.93		2.02	1.96		215.75	215.69	213.73
22H	199.3		26.97	26.86	24.9		2.07	1.96		226.27	226.16	224.2
23H	208.8		27.84	27.67	25.71		2.13	1.96		236.64	236.47	234.51
24H	218.3		29.4	29.27	27.31		2.09	1.96		247.7	247.57	245.61
25H	227.8		30.78	30.66	28.7		2.08	1.96		258.58	258.46	256.5
26H	237.3		31.65	32.7	30.74		0.91	1.96		268.95	270	268.04
27H	246.8		32.5	33.5	31.54		0.96	1.96		279.3	280.3	278.34
28H	256.3		33.72	34.92	32.96		0.76	1.96		290.02	291.22	289.26
29H	261.7		34.61	35.91	33.95		0.66	1.96		296.31	297.61	295.65
30H	271.2		35.61	37.09	35.13		0.48	1.96		306.81	308.29	306.33

## Sheet: Revised offsets Hole 1264B
Key	BOLD = changes compared to shipboard and Liebrand et al., 2016						Italics = shipboard splice, but shifted to accommodate new offsets higher in the section.
Core	Depth		Shipboard Offset	Revised Offset L16	Revised Offset D21 (this study)		Change in offset ship-D21 (this study)	Change in offset L16-D21 (this study)		shipboard composite depth	L16 Revised composite depth	D21 (this study) Revised composite depth
	(mbsf)		(m)	(m)	(m)		(m)	(m)		(mcd)	(rmcd - Liebrand et al., 2016)	(rmcd - this study)
208-1264B-
1H	0		0	0	0		0	0		0	0	0
2H	7.3		1.11	1.11	1.11		0	0		8.41	8.41	8.41
3H	16.8		2.81	2.81	2.81		0	0		19.61	19.61	19.61
4H	26.3		3.45	3.45	3.6		-0.15	-0.15		29.75	29.75	29.9
5H	35.8		4.02	4.02	4.17		-0.15	-0.15		39.82	39.82	39.97
6H	45.3		5.73	5.73	6.26		-0.53	-0.53		51.03	51.03	51.56
7H	54.8		6.49	6.49	6.1		0.39	0.39		61.29	61.29	60.9
8H	64.3		8.01	8.01	7.76		0.25	0.25		72.31	72.31	72.06
9H	73.8		9.06	9.06	8.67		0.39	0.39		82.86	82.86	82.47
10H	83.3		10.3	10.3	9.88		0.42	0.42		93.6	93.6	93.18
11H	92.8		11.41	11.41	10.44		0.97	0.97		104.21	104.21	103.24
12H	102.3		13.72	13.72	11.9		1.82	1.82		116.02	116.02	114.2
13H	111.8		14.77	14.77	12.72		2.05	2.05		126.57	126.57	124.52
14H	121.3		16.23	16.23	14.18		2.05	2.05		137.53	137.53	135.48
15H	130.8		17.14	17.14	15.18		1.96	1.96		147.94	147.94	145.98
16H	140.3		18.34	18.34	16.38		1.96	1.96		158.64	158.64	156.68
17H	149.8		18.59	18.59	16.63		1.96	1.96		168.39	168.39	166.43
18H	159.3		19.63	19.63	17.67		1.96	1.96		178.93	178.93	176.97
19H	168.8		20.79	20.79	18.83		1.96	1.96		189.59	189.59	187.63
20H	178.3		21.41	21.41	19.45		1.96	1.96		199.71	199.71	197.75
21H	187.8		22.02	22.02	20.06		1.96	1.96		209.82	209.82	207.86
22H	197.3		22.77	22.71	20.75		2.02	1.96		220.07	220.01	218.05
23H	206.8		23.77	23.61	21.65		2.12	1.96		230.57	230.41	228.45
24H	216.3		24.47	24.31	22.35		2.12	1.96		240.77	240.61	238.65
25H	225.8		26.48	26.32	24.36		2.12	1.96		252.28	252.12	250.16
26H	235.3		28.05	29.16	27.2		0.85	1.96		263.35	264.46	262.5
27H	244.8		29.33	30.38	28.42		0.91	1.96		274.13	275.18	273.22
28H	254.3		30.92	32.08	30.12		0.8	1.96		285.22	286.38	284.42
29H	263.8		31.55	32.91	30.95		0.6	1.96		295.35	296.71	294.75
30H	273.3		32.97	34.51	32.55		0.42	1.96		306.27	307.81	305.85

## Sheet: Revised offsets Hole 1264C
Key	BOLD = changes compared to shipboard and Liebrand et al., 2016						Italics = shipboard splice, but shifted to accommodate new offsets higher in the section.
Core	Depth		Shipboard Offset	Revised Offset L16	Revised Offset D21 (this study)		Change in offset ship-D21 (this study)	Change in offset L16-D21 (this study)		shipboard composite depth	L16 Revised composite depth	D21 (this study) Revised composite depth
	(mbsf)		(m)	(m)	(m)		(m)	(m)		(mcd)	(rmcd - Liebrand et al., 2016)	(rmcd - this study)
208-1264C-
1H	0		0.1	0.1	0.1		0	0		0.1	0.1	0.1
