# Supplementary material for: Climate, cryosphere and carbon cycle controls on Southeast Atlantic orbital-scale carbonate deposition since the Oligocene (30–0 Ma)
Source: Copernicus journal article supplement (doi:10.5194/cp-17-2091-2021), 2021-10-15
Supplement: Supplementary file 2 [file SI Table S3 - Site 1264 Splice FINAL.xlsx]

## Sheet: Splice tie table Site 1264
Key		BOLD = new splice tie point		Italics = old splice tie point with revised composite depth
Revised composite splice
Splice tie point	Depth		Tie type	Splice tie point	Depth
Hole, core, section, interval (cm)	mbsf	D21 rmcd (this study)		Hole, core, section, interval (cm)	mbsf	D21 rmcd (this study)
208-				208-
1264B-1H-3, 95	3.95	3.95	Tie to	1264A-1H-1, 99	0.99	3.95
1264A-1H-7, 10	8.6	11.56	Tie to	1264B-2H-3, 15	10.45	11.56
1264B-2H-6, 122.5	16.025	17.135	Tie to	1264A-2H-3, 50	12.8	17.13
1264A-2H-5, 75	16.05	20.38	Tie to	1264B-3H-1, 77	17.57	20.38	Small 1 cm correction to shipboard ID for B-3H-1, as this wasn't consistent with the shipboard mbsf and mcd
1264B-3H-5, 92.5	23.705	26.515	Tie to	1264A-3H-2, 32.5	20.625	26.515
1264A-3H-6, 112	27.42	33.31	Tie to	1264B-4H-3, 41	29.71	33.31
1264B-4H-5, 85	33.15	36.75	Tie to	1264A-4H-1, 124	29.54	36.75
1264A-4H-4, 90	33.7	40.91	Tie to	1264B-5H-1, 94	36.74	40.91
1264B-5H-6, 111	44.41	48.58	Tie to	1264A-5H-2, 60	39.9	48.58
1264A-5H-5, 128	45.08	53.76	Tie to	1264B-6H-2, 70	47.5	53.76
1264B-6H-6, 74	53.54	59.8	Tie to	1264A-6H-2, 98	49.78	59.8
1264A-6H-6, 103	54.71	64.73	Tie to	1264B-7H-3, 83	58.63	64.73
1264B-7H-6, 125	63.55	69.65	Tie to	1264A-7H-2, 30	58.6	69.65
1264A-7H-5, 43	63.23	74.28	Tie to	1264B-8H-2, 72	66.52	74.28
1264B-8H-7, 10	73.4	81.16	Tie to	1264A-8H-2, 49	68.29	81.16
1264A-8H-5, 81	73.11	85.98	Tie to	1264B-9H-3, 51	77.31	85.98
1264B-9H-7, 23	83.03	91.7	Tie to	1264A-9H-2, 52	77.82	91.7
1264A-9H-5, 82	82.62	96.5	Tie to	1264B-10H-3, 32	86.62	96.5
1264B-10H-6, 88	91.57	101.45	Tie to	1264A-10H-2, 21	87.01	101.45
1264A-10H-4, 124	91.04	105.48	Tie to	1264B-11H-2, 143	95.04	105.48
1264B-11H-8, 39	102.5	112.94	Tie to	1264A-11H-3, 44	98.24	112.94
1264A-11H-6, 134	103.64	118.34	Tie to	1264B-12H-4, 61	106.44	118.34
1264B-12H-5, 146	108.79	120.69	Tie to	1264A-12H-1, 119	105.49	120.69
1264A-12H-6, 17	111.97	127.17	Tie to	1264B-13H-2, 115	114.45	127.17
1264B-13H-6, 65	119.95	132.67	Tie to	1264A-13H-2, 58	115.88	132.67
1264A-13H-5, 137.5	121.175	137.965	Tie to	1264B-14H-2, 98.5	123.785	137.965
1264B-14H-6, 87	129.67	143.85	Tie to	1264A-14H-3, 66	126.96	143.85
1264A-14H-6, 97	131.77	148.66	Tie to	1264B-15H-2, 118	133.48	148.66
1264B-15H-5, 120	138	153.18	Tie to	1264A-15H-2, 100	135.3	153.18
1264A-15H-6, 77.5	141.075	158.955	Tie to	1264B-16H-2, 77.5	142.575	158.955	Small 2 cm correction to shipboard ID for B-16H-2, as this wasn't consistent with the shipboard mbsf and mcd, or later mcd revisions
1264B-16H-5, 122.5	147.525	163.905	Tie to	1264A-16H-3, 72.5	146.025	163.905
1264A-16H-6, 105	150.85	168.73	Tie to	1264B-17H-2, 80	152.1	168.73
1264B-17H-5, 90	156.7	173.33	Tie to	1264A-17H-2, 60	153.9	173.33	Small 2 cm correction to shipboard ID for A-17H-2, as this wasn't consistent with the shipboard mbsf and mcd, or later mcd revisions
1264A-17H-5, 27.5	158.075	177.505	Tie to	1264B-18H-1, 53.5	159.835	177.505	Small 1.5 cm correction to shipboard ID for B-18H-1, as this wasn't consistent with the shipboard mbsf and mcd, or later mcd revisions
1264B-18H-6, 10	166.9	184.57	Tie to	1264A-18H-3, 31	164.61	184.57
1264A-18H-7, 42.5	170.725	190.685	Tie to	1264B-19H-3, 5.5	171.855	190.685	Small 1 cm correction to shipboard ID for B-18H-1, as this wasn't consistent with the shipboard mbsf and mcd, or later mcd revisions
1264B-19H-6, 100	177.3	196.13	Tie to	1264A-19H-3, 38	174.18	196.13	Liebrand et al., 2016 revisions adjusted to account for changes to the overlying composite depth scale
1264A-19H-5, 105	177.85	199.8	Tie to	1264B-20H-2, 55	180.35	199.8	Liebrand et al., 2016 revisions adjusted to account for changes to the overlying composite depth scale
1264B-20H-5, 88	185.18	204.63	Tie to	1264A-20H-1, 140	181.7	204.63	Liebrand et al., 2016 revisions adjusted to account for changes to the overlying composite depth scale
1264A-20H-6, 95	188.75	211.68	Tie to	1264B-21H-3, 82	191.62	211.68	Liebrand et al., 2016 revisions adjusted to account for changes to the overlying composite depth scale
1264B-21H-5, 75	194.55	214.61	Tie to	1264A-21H-1, 88	190.68	214.61	Liebrand et al., 2016 revisions adjusted to account for changes to the overlying composite depth scale
1264A-21H-5, 92	196.72	220.65	Tie to	1264B-22H-2, 110	199.9	220.65	Liebrand et al., 2016 revisions adjusted to account for changes to the overlying composite depth scale
1264B-22H-6, 92	205.72	226.47	Tie to	1264A-22H-2, 77	201.57	226.47	Liebrand et al., 2016 revisions adjusted to account for changes to the overlying composite depth scale
1264A-22H-5, 95	206.25	231.15	Tie to	1264B-23H-2, 120	209.5	231.15	Liebrand et al., 2016 revisions adjusted to account for changes to the overlying composite depth scale
1264B-23H-6, 88	215.18	236.83	Tie to	1264A-23H-2, 82	211.12	236.83	Liebrand et al., 2016 revisions adjusted to account for changes to the overlying composite depth scale
1264A-23H-6, 32	216.62	242.33	Tie to	1264B-24H-3, 68	219.98	242.33	Liebrand et al., 2016 revisions adjusted to account for changes to the overlying composite depth scale
1264B-24H-6, 102	224.82	247.17	Tie to	1264A-24H-2, 6	219.86	247.17	Liebrand et al., 2016 revisions adjusted to account for changes to the overlying composite depth scale
1264A-24H-4, 90	223.7	251.01	Tie to	1264B-25H-1, 85	226.65	251.01	Liebrand et al., 2016 revisions adjusted to account for changes to the overlying composite depth scale
1264B-25H-5, 58	232.38	256.74	Tie to	1264A-25H-1, 24	228.04	256.74	Liebrand et al., 2016 revisions adjusted to account for changes to the overlying composite depth scale
1264A-25H-9, 20	231.82	260.52	Append to	1264B-26H-1, 0	235.3	262.5	Liebrand et al., 2016 revisions adjusted to account for changes to the overlying composite depth scale
1264B-26H-5, 5	241.35	268.55	Tie to	1264A-26H-1, 51	237.81	268.55	Liebrand et al., 2016 revisions adjusted to account for changes to the overlying composite depth scale
1264A-26H-5, 128	244.58	275.32	Tie to	1264B-27H-2, 60	246.9	275.32	Liebrand et al., 2016 revisions adjusted to account for changes to the overlying composite depth scale
1264B-27H-7, 75	254.55	282.97	Append to	1264B-28H-1, 0	254.3	284.42	Liebrand et al., 2016 revisions adjusted to account for changes to the overlying composite depth scale
1264B-28H-5, 35	260.65	290.77	Tie to	1264A-28H-2, 1	257.81	290.77	Liebrand et al., 2016 revisions adjusted to account for changes to the overlying composite depth scale
1264A-28H-9, 18	261.67	294.63	Append to	1264B-29H-1, 0	263.8	294.75	Liebrand et al., 2016 revisions adjusted to account for changes to the overlying composite depth scale
1264B-29H-2, 108	266.38	297.33	Tie to	1264A-29H-2, 18	263.38	297.33	Liebrand et al., 2016 revisions adjusted to account for changes to the overlying composite depth scale
1264A-29H-9, 5	271.44	305.39	Append to	1264B-30H-1, 0	273.3	305.85	Liebrand et al., 2016 revisions adjusted to account for changes to the overlying composite depth scale
1264B-30H-3, 85	277.15	309.7	Tie to	1264A-30H-3, 37	274.57	309.7	Liebrand et al., 2016 revisions adjusted to account for changes to the overlying composite depth scale
1264A-30H-9, 8	280.83	315.96
