# Supplementary material for: Climate, cryosphere and carbon cycle controls on Southeast Atlantic orbital-scale carbonate deposition since the Oligocene (30–0 Ma)
Source: Copernicus journal article supplement (doi:10.5194/cp-17-2091-2021), 2021-10-15
Supplement: Supplementary file 3 [file SI Table S4 - Site 1264 Mapping pairs.xlsx]

## Sheet: 1264A mapping pairs
ODP ID	mbsf	core D21 rmcd	splice D21 rmcd	Tie note	Source
208-1264A-1H-1, 3	0.03	2.99	2.95	Offsplice adjustment	This study
208-1264A-1H-1, 12	0.12	3.08	3.08	Offsplice adjustment	This study
208-1264A-1H-1, 99	0.99	3.95	3.95	Splice tie	This study
208-1264A-1H-7, 10	8.6	11.56	11.56	Splice tie	This study
208-1264A-1H-CC, 3	9.1	12.06	12.09	Offsplice adjustment	This study
208-1264A-2H-1, 28	9.58	13.91	13.59	Offsplice adjustment	This study
208-1264A-2H-2, 90	11.7	16.03	15.84	Offsplice adjustment	This study
208-1264A-2H-2, 145	12.25	16.58	16.39	Offsplice adjustment	This study
208-1264A-2H-3, 50	12.8	17.13	17.13	Splice tie	This study
208-1264A-2H-5, 75	16.05	20.38	20.38	Splice tie	This study
208-1264A-2H-6, 55	17.35	21.68	21.69	Offsplice adjustment	This study
208-1264A-2H-6, 123	18.03	22.36	22.26	Offsplice adjustment	This study
208-1264A-2H-CC, 3	18.97	23.3	23.14	Offsplice adjustment	This study
208-1264A-3H-1, 5	18.85	24.74	24.36	Offsplice adjustment	This study
208-1264A-3H-1, 94	19.74	25.63	25.48	Offsplice adjustment	This study
208-1264A-3H-2, 33	20.63	26.52	26.52	Splice tie	This study
208-1264A-3H-6, 112	27.42	33.31	33.31	Splice tie	This study
208-1264A-3H-CC, 12	28.22	34.11	33.82	Offsplice adjustment	This study
208-1264A-4H-1, 12	28.42	35.63	35.17	Uncertain tie; Offsplice adjustment	This study
208-1264A-4H-1, 26	28.56	35.77	35.77	Offsplice adjustment	This study
208-1264A-4H-1, 124	29.54	36.75	36.75	Splice tie	This study
208-1264A-4H-4, 90	33.7	40.91	40.91	Splice tie	This study
208-1264A-4H-7, 20	37.5	44.71	44.42	Offsplice adjustment	This study
208-1264A-4H-CC, 9	37.89	45.1	44.92	Offsplice adjustment	This study
208-1264A-5H-1, 3	37.83	46.51	45.81	Uncertain tie; Offsplice adjustment	This study
208-1264A-5H-1, 80	38.6	47.28	46.59	Uncertain tie; Offsplice adjustment	This study
208-1264A-5H-2, 1	39.31	47.99	47.57	Uncertain tie; Offsplice adjustment	This study
208-1264A-5H-2, 54	39.84	48.52	48.38	Uncertain tie; Offsplice adjustment	This study
208-1264A-5H-2, 60	39.9	48.58	48.58	Splice tie	This study
208-1264A-5H-5, 128	45.08	53.76	53.76	Splice tie	This study
208-1264A-5H-6, 96	46.26	54.94	54.78	Uncertain tie; Offsplice adjustment	This study
208-1264A-5H-7, 0	46.8	55.48	55.3	Uncertain tie; Offsplice adjustment	This study
208-1264A-6H-1, 23	47.53	57.55	56.74	Offsplice adjustment	This study
208-1264A-6H-1, 115	48.45	58.47	58.13	Offsplice adjustment	This study
208-1264A-6H-2, 62	49.42	59.44	59.39	Offsplice adjustment	This study
208-1264A-6H-2, 98	49.78	59.8	59.8	Splice tie	This study
208-1264A-6H-6, 103	54.71	64.73	64.73	Splice tie	This study
208-1264A-6H-6, 128	54.96	64.98	65.13	Offsplice adjustment	This study
208-1264A-6H-CC, 28	56.18	66.2	66.55	Offsplice adjustment	This study
208-1264A-7H-1, 9	56.89	67.94	67.71	Offsplice adjustment	This study
208-1264A-7H-1, 49	57.29	68.34	68.24	Offsplice adjustment	This study
208-1264A-7H-1, 117	57.97	69.02	68.98	Offsplice adjustment	This study
208-1264A-7H-2, 30	58.6	69.65	69.65	Splice tie	This study
208-1264A-7H-5, 43	63.23	74.28	74.28	Splice tie	This study
208-1264A-7H-6, 11	64.41	75.46	75.48	Offsplice adjustment	This study
208-1264A-7H-6, 132	65.62	76.67	76.92	Uncertain tie; Offsplice adjustment	This study
208-1264A-7H-7, 51	66.31	77.36	77.45	Offsplice adjustment	This study
208-1264A-8H-1, 39	66.69	79.56	79.5	Offsplice adjustment	This study
208-1264A-8H-2, 49	68.29	81.16	81.16	Splice tie	This study
208-1264A-8H-5, 81	73.11	85.98	85.98	Splice tie	This study
208-1264A-8H-5, 104	73.34	86.21	86.17	Offsplice adjustment	This study
208-1264A-8H-5, 136	73.66	86.53	86.37	Offsplice adjustment	This study
208-1264A-8H-6, 28	74.08	86.95	86.74	Offsplice adjustment	This study
208-1264A-8H-6, 118	74.98	87.85	88.1	Offsplice adjustment	This study
208-1264A-8H-7, 14	75.44	88.31	88.71	Offsplice adjustment	This study
208-1264A-8H-CC, 6	75.7	88.57	88.93	Offsplice adjustment	This study
208-1264A-9H-1, 32	76.12	90	89.69	Offsplice adjustment	This study
208-1264A-9H-2, 52	77.82	91.7	91.7	Splice tie	This study
208-1264A-9H-5, 82	82.62	96.5	96.5	Splice tie	This study
208-1264A-9H-5, 134	83.14	97.02	97	Offsplice adjustment	This study
208-1264A-9H-6, 10	83.4	97.28	97.38	Offsplice adjustment	This study
208-1264A-9H-6, 60	83.9	97.78	97.74	Offsplice adjustment	This study
208-1264A-9H-6, 113	84.43	98.31	98.24	Offsplice adjustment	This study
208-1264A-10H-1, 5	85.35	99.79	99.7	Offsplice adjustment	This study
208-1264A-10H-1, 35	85.65	100.09	100.08	Offsplice adjustment	This study
208-1264A-10H-2, 21	87.01	101.45	101.45	Splice tie	This study
208-1264A-10H-4, 124	91.04	105.48	105.48	Splice tie	This study
208-1264A-10H-6, 110	93.9	108.34	108.33	Uncertain tie; Offsplice adjustment	This study
208-1264A-11H-1, 3	94.83	109.53	109.55	Offsplice adjustment	This study
208-1264A-11H-1, 116	95.96	110.66	110.69	Offsplice adjustment	This study
208-1264A-11H-3, 44	98.24	112.94	112.94	Splice tie	This study
208-1264A-11H-6, 134	103.64	118.34	118.34	Splice tie	This study
208-1264A-11H-7, 81	104.61	119.31	119.31	Offsplice adjustment	This study
208-1264A-12H-1, 8	104.38	119.58	119.67	Offsplice adjustment	This study
208-1264A-12H-1, 53	104.83	120.03	120.1	Offsplice adjustment	This study
208-1264A-12H-1, 119	105.49	120.69	120.69	Splice tie	This study
208-1264A-12H-6, 17	111.97	127.17	127.17	Splice tie	This study
208-1264A-12H-6, 140	113.2	128.4	128.31	Offsplice adjustment	This study
208-1264A-12H-7, 74	114.04	129.24	129.04	Offsplice adjustment	This study
208-1264A-13H-1, 5	113.85	130.64	130.49	Offsplice adjustment	This study
208-1264A-13H-1, 57	114.37	131.16	130.99	Offsplice adjustment	This study
208-1264A-13H-2, 58	115.88	132.67	132.67	Splice tie	This study
208-1264A-13H-5, 138	121.18	137.97	137.97	Splice tie	This study
208-1264A-13H-7, 66	122.96	139.75	139.84	Offsplice adjustment	This study
208-1264A-14H-1, 8	123.38	140.27	140.03	Offsplice adjustment	This study
208-1264A-14H-1, 41	123.71	140.6	140.44	Offsplice adjustment	This study
208-1264A-14H-1, 73	124.03	140.92	140.97	Offsplice adjustment	This study
208-1264A-14H-1, 111	124.41	141.3	141.49	Offsplice adjustment	This study
208-1264A-14H-2, 20	125	141.89	142.01	Offsplice adjustment	This study
208-1264A-14H-2, 70	125.5	142.39	142.55	Offsplice adjustment	This study
208-1264A-14H-3, 66	126.96	143.85	143.85	Splice tie	This study
208-1264A-14H-6, 97	131.77	148.66	148.66	Splice tie	This study
208-1264A-14H-7, 12	132.42	149.31	149.46	Offsplice adjustment	This study
208-1264A-14H-CC, 8	132.79	149.68	149.76	Offsplice adjustment	This study
208-1264A-15H-1, 16	132.96	150.84	150.62	Offsplice adjustment	This study
208-1264A-15H-1, 44	133.24	151.12	150.95	Offsplice adjustment	This study
208-1264A-15H-2, 28	134.58	152.46	152.4	Offsplice adjustment	This study
208-1264A-15H-2, 100	135.3	153.18	153.18	Splice tie	This study
208-1264A-15H-6, 78	141.08	158.96	158.96	Splice tie	This study
208-1264A-15H-CC, 10	142.08	159.96	159.94	Offsplice adjustment	This study
208-1264A-16H-1, 4	142.34	160.22	160.18	Offsplice adjustment	This study
208-1264A-16H-1, 51	142.81	160.69	160.74	Offsplice adjustment	This study
208-1264A-16H-1, 100	143.3	161.18	161.2	Offsplice adjustment	This study
208-1264A-16H-2, 2	143.82	161.7	161.66	Offsplice adjustment	This study
208-1264A-16H-2, 36	144.16	162.04	162.03	Offsplice adjustment	This study
208-1264A-16H-2, 87	144.67	162.55	162.58	Offsplice adjustment	This study
208-1264A-16H-2, 120	145	162.88	162.93	Offsplice adjustment	This study
208-1264A-16H-3, 73	146.03	163.91	163.91	Splice tie	This study
208-1264A-16H-6, 105	150.85	168.73	168.73	Splice tie	This study
208-1264A-16H-7, 21	151.51	169.39	169.41	Offsplice adjustment	This study
208-1264A-16H-7, 56	151.86	169.74	169.82	Offsplice adjustment	This study
208-1264A-16H-CC, 18	152.08	169.96	170.13	Offsplice adjustment	This study
208-1264A-17H-1, 4	151.84	171.27	171.15	Offsplice adjustment	This study
208-1264A-17H-2, 58	153.88	173.31	173.31	Offsplice adjustment	This study
208-1264A-17H-5, 28	158.08	177.51	177.51	Splice tie	This study
208-1264A-17H-5, 73	158.53	177.96	178.02	Splice tie	This study
208-1264A-17H-6, 23	159.53	178.96	178.92	Offsplice adjustment	This study
208-1264A-17H-7, 58	161.08	180.51	180.49	Offsplice adjustment	This study
208-1264A-18H-1, 28	161.58	181.54	181.18	Offsplice adjustment	This study
208-1264A-18H-1, 66	161.96	181.92	181.49	Offsplice adjustment	This study
208-1264A-18H-2, 1	162.81	182.77	182.57	Offsplice adjustment	This study
208-1264A-18H-2, 32	163.12	183.08	182.98	Offsplice adjustment	This study
208-1264A-18H-3, 31	164.61	184.57	184.57	Splice tie	This study
208-1264A-18H-7, 43	170.73	190.69	190.69	Splice tie	This study
208-1264A-18H-7, 62	170.92	190.88	190.82	Offsplice adjustment	This study
208-1264A-19H-1, 1	170.81	192.76	192.04	Top of core; Offsplice adjustment	Liebrand et al., 2016 mapping pairs updated to account for composite splice revisions;
208-1264A-19H-1, 89	171.69	193.64	193.06	Offsplice adjustment	Liebrand et al., 2016 mapping pairs updated to account for composite splice revisions;
208-1264A-19H-1, 149	172.29	194.24	193.78	Offsplice adjustment	Liebrand et al., 2016 mapping pairs updated to account for composite splice revisions;
208-1264A-19H-2, 59	172.89	194.84	194.48	Offsplice adjustment	Liebrand et al., 2016 mapping pairs updated to account for composite splice revisions;
208-1264A-19H-2, 119	173.49	195.44	195.18	Offsplice adjustment	Liebrand et al., 2016 mapping pairs updated to account for composite splice revisions;
208-1264A-19H-3, 38	174.18	196.13	196.13	Splice tie	Liebrand et al., 2016 mapping pairs updated to account for composite splice revisions;
208-1264A-19H-5, 105	177.85	199.8	199.8	Splice tie	Liebrand et al., 2016 mapping pairs updated to account for composite splice revisions;
208-1264A-19H-CC, 12	179.77	201.72	201.72	Bottom of core; Offsplice adjustment	Liebrand et al., 2016 mapping pairs updated to account for composite splice revisions;
208-1264A-20H-1, 1	180.31	203.24	202.99	Top of core; Offsplice adjustment	Liebrand et al., 2016 mapping pairs updated to account for composite splice revisions;
208-1264A-20H-1, 140	181.7	204.63	204.63	Splice tie	Liebrand et al., 2016 mapping pairs updated to account for composite splice revisions;
208-1264A-20H-6, 95	188.75	211.68	211.68	Splice tie	Liebrand et al., 2016 mapping pairs updated to account for composite splice revisions;
208-1264A-20H-CC, 9	190.18	213.11	213.11	Bottom of core; Offsplice adjustment	Liebrand et al., 2016 mapping pairs updated to account for composite splice revisions;
208-1264A-21H-1, 1	189.81	213.74	213.74	Top of core; Offsplice adjustment	Liebrand et al., 2016 mapping pairs updated to account for composite splice revisions;
208-1264A-21H-1, 88	190.68	214.61	214.61	Splice tie	Liebrand et al., 2016 mapping pairs updated to account for composite splice revisions;
208-1264A-21H-5, 92	196.72	220.65	220.65	Splice tie; ID changed by 1 cm (originally 93)	Liebrand et al., 2016 mapping pairs updated to account for composite splice revisions;
208-1264A-21H-6, 52	197.82	221.75	221.75	Offsplice adjustment	Liebrand et al., 2016 mapping pairs updated to account for composite splice revisions;
208-1264A-21H-CC, 14	198.83	222.76	223.07	Bottom of core; Offsplice adjustment	Liebrand et al., 2016 mapping pairs updated to account for composite splice revisions;
208-1264A-22H-1, 1	199.31	224.21	223.79	Top of core; Offsplice adjustment	Liebrand et al., 2016 mapping pairs updated to account for composite splice revisions;
208-1264A-22H-2, 77	201.57	226.47	226.47	Splice tie	Liebrand et al., 2016 mapping pairs updated to account for composite splice revisions;
208-1264A-22H-5, 95	206.25	231.15	231.15	Splice tie	Liebrand et al., 2016 mapping pairs updated to account for composite splice revisions;
208-1264A-22H-CC, 14	208.92	233.82	233.82	Bottom of core; Offsplice adjustment	Liebrand et al., 2016 mapping pairs updated to account for composite splice revisions;
208-1264A-23H-1, 1	208.81	234.52	234.34	Top of core; Offsplice adjustment	Liebrand et al., 2016 mapping pairs updated to account for composite splice revisions;
208-1264A-23H-1, 118	209.98	235.69	235.58	Offsplice adjustment	Liebrand et al., 2016 mapping pairs updated to account for composite splice revisions;
208-1264A-23H-2, 82	211.12	236.83	236.83	Splice tie	Liebrand et al., 2016 mapping pairs updated to account for composite splice revisions;
208-1264A-23H-6, 32	216.62	242.33	242.33	Splice tie	Liebrand et al., 2016 mapping pairs updated to account for composite splice revisions;
208-1264A-23H-CC, 11	218.33	244.04	244.36	Bottom of core; Offsplice adjustment	Liebrand et al., 2016 mapping pairs updated to account for composite splice revisions;
208-1264A-24H-1, 1	218.31	245.62	245.19	Top of core; Offsplice adjustment	Liebrand et al., 2016 mapping pairs updated to account for composite splice revisions;
208-1264A-24H-1, 128	219.58	246.89	246.7	Offsplice adjustment	Liebrand et al., 2016 mapping pairs updated to account for composite splice revisions;
208-1264A-24H-2, 6	219.86	247.17	247.17	Splice tie	Liebrand et al., 2016 mapping pairs updated to account for composite splice revisions;
208-1264A-24H-4, 90	223.7	251.01	251.01	Splice tie	Liebrand et al., 2016 mapping pairs updated to account for composite splice revisions;
208-1264A-24H-6, 38	226.18	253.49	253.74	Offsplice adjustment	Liebrand et al., 2016 mapping pairs updated to account for composite splice revisions;
208-1264A-24H-CC, 21	228.26	255.57	255.76	Bottom of core; Offsplice adjustment	Liebrand et al., 2016 mapping pairs updated to account for composite splice revisions;
208-1264A-25H-1, 1	227.81	256.51	256.51	Top of core; Offsplice adjustment	Liebrand et al., 2016 mapping pairs updated to account for composite splice revisions;
208-1264A-25H-1, 24	228.04	256.74	256.74	Splice tie	Liebrand et al., 2016 mapping pairs updated to account for composite splice revisions;
208-1264A-25H-CC, 20	231.82	260.52	260.52	Splice tie at bottom of core	This study
208-1264A-25H-CC, 29	231.91	260.61	260.61	Append/Bottom; Offsplice adjustment	Liebrand et al., 2016 mapping pairs updated to account for composite splice revisions;
208-1264A-26H-1, 1	237.31	268.05	267.84	Top of core; Offsplice adjustment	Liebrand et al., 2016 mapping pairs updated to account for composite splice revisions;
208-1264A-26H-1, 51	237.81	268.55	268.55	Splice tie	Liebrand et al., 2016 mapping pairs updated to account for composite splice revisions;
208-1264A-26H-5, 128	244.58	275.32	275.32	Splice tie	Liebrand et al., 2016 mapping pairs updated to account for composite splice revisions;
208-1264A-26H-CC, 15	246.22	276.96	277.05	Bottom of core; Offsplice adjustment	Liebrand et al., 2016 mapping pairs updated to account for composite splice revisions;
208-1264A-27H-1, 1	246.81	278.35	278.35	Top of core; Offsplice adjustment	Liebrand et al., 2016 mapping pairs updated to account for composite splice revisions;
208-1264A-27H-CC, 35	249.66	281.2	281.2	Bottom of core; Offsplice adjustment	Liebrand et al., 2016 mapping pairs updated to account for composite splice revisions;
208-1264A-28H-1, 1	256.31	289.27	289.14	Top of core; Offsplice adjustment	Liebrand et al., 2016 mapping pairs updated to account for composite splice revisions;
208-1264A-28H-1, 121	257.51	290.47	290.47	Splice tie	Liebrand et al., 2016 mapping pairs updated to account for composite splice revisions;
208-1264A-28H-2, 1	257.81	290.77	290.77	Splice tie	Liebrand et al., 2016 mapping pairs updated to account for composite splice revisions;
208-1264A-28H-CC, 24	261.73	294.69	294.69	Append/Bottom; Offsplice adjustment	Liebrand et al., 2016 mapping pairs updated to account for composite splice revisions;
208-1264A-29H-1, 1	261.71	295.66	295.39	Top of core; Offsplice adjustment	Liebrand et al., 2016 mapping pairs updated to account for composite splice revisions;
208-1264A-29H-1, 79	262.49	296.44	296.33	Splice tie	Liebrand et al., 2016 mapping pairs updated to account for composite splice revisions;
208-1264A-29H-2, 18	263.38	297.33	297.33	Splice tie	Liebrand et al., 2016 mapping pairs updated to account for composite splice revisions;
208-1264A-29H-CC, 13	271.52	305.47	305.47	Append/Bottom; Offsplice adjustment; adjusted by 1 cm from Liebrand et al., 2016	Liebrand et al., 2016 mapping pairs updated to account for composite splice revisions;
208-1264A-30H-1, 1	271.21	306.34	306.19	Top of core; Offsplice adjustment	Liebrand et al., 2016 mapping pairs updated to account for composite splice revisions;
208-1264A-30H-3, 37	274.57	309.7	309.7	Splice tie	Liebrand et al., 2016 mapping pairs updated to account for composite splice revisions;
208-1264A-30H-CC, 14	280.89	316.02	316.02	Bottom of core; Offsplice adjustment	Liebrand et al., 2016 mapping pairs updated to account for composite splice revisions;

## Sheet: 1264B mapping pairs
ODP ID	mbsf	core D21 rmcd	splice D21 rmcd	Tie note	Source
208-1264B-1H-1, 0	0	0	0	Splice tie	This study
208-1264B-1H-3, 95	3.95	3.95	3.95	Splice tie	This study
208-1264B-1H-4, 55	5.05	5.05	5.03	Offsplice adjustment	This study
208-1264B-1H-5, 64	6.64	6.64	6.63	Offsplice adjustment	This study
208-1264B-1H-5, 110	7.1	7.1	7.14	Offsplice adjustment	This study
208-1264B-1H-CC, 3	7.29	7.29	7.32	Offsplice adjustment	This study
208-1264B-2H-1, 3	7.33	8.44	8.39	Offsplice adjustment	This study
208-1264B-2H-3, 15	10.45	11.56	11.56	Splice tie	This study
208-1264B-2H-6, 123	16.03	17.14	17.14	Splice tie	This study
208-1264B-2H-CC, 0	17.08	18.19	18.16	Offsplice adjustment	This study
208-1264B-3H-1, 10	16.9	19.71	19.72	Offsplice adjustment	This study
208-1264B-3H-1, 76	17.56	20.37	20.37	Splice tie	This study
208-1264B-3H-5, 93	23.71	26.52	26.52	Splice tie	This study
208-1264B-3H-6, 5	24.33	27.14	27.15	Offsplice adjustment	This study
208-1264B-3H-7, 75	26.53	29.34	29.12	Offsplice adjustment	This study
208-1264B-4H-1, 14	26.44	30.04	30.73	Uncertain tie; Offsplice adjustment	This study
208-1264B-4H-2, 8	27.88	31.48	31.51	Offsplice adjustment	This study
208-1264B-4H-2, 137	29.17	32.77	32.88	Offsplice adjustment	This study
208-1264B-4H-3, 41	29.71	33.31	33.31	Splice tie	This study
208-1264B-4H-5, 85	33.15	36.75	36.75	Splice tie	This study
208-1264B-4H-6, 30	34.1	37.7	37.91	Offsplice adjustment	This study
208-1264B-4H-6, 50	34.3	37.9	38.09	Offsplice adjustment	This study
208-1264B-4H-6, 63	34.43	38.03	38.53	Offsplice adjustment	This study
208-1264B-4H-7, 8	35.38	38.98	39.13	Offsplice adjustment	This study
208-1264B-4H-CC, 5	36	39.6	39.63	Offsplice adjustment	This study
208-1264B-5H-1, 0	35.8	39.97	39.87	Offsplice adjustment	This study
208-1264B-5H-1, 13	35.93	40.1	40.06	Offsplice adjustment	This study
208-1264B-5H-1, 94	36.74	40.91	40.91	Splice tie	This study
208-1264B-5H-6, 111	44.41	48.58	48.58	Splice tie	This study
208-1264B-5H-7, 31	45.11	49.28	49.46	Uncertain tie; Offsplice adjustment	This study
208-1264B-6H-1, 4	45.34	51.6	51.36	Offsplice adjustment	This study
208-1264B-6H-2, 70	47.5	53.76	53.76	Splice tie	This study
208-1264B-6H-6, 74	53.54	59.8	59.8	Splice tie	This study
208-1264B-6H-CC, 1	54.84	61.1	61.07	Offsplice adjustment	This study
208-1264B-6H-7, 35	54.65	60.91	61.1	Offsplice adjustment	This study
208-1264B-7H-1, 40	55.2	61.3	61.48	Offsplice adjustment	This study
208-1264B-7H-1, 82	55.62	61.72	61.7	Offsplice adjustment	This study
208-1264B-7H-2, 137	57.67	63.77	63.65	Offsplice adjustment	This study
208-1264B-7H-3, 61	58.41	64.51	64.56	Offsplice adjustment	This study
208-1264B-7H-3, 83	58.63	64.73	64.73	Splice tie	This study
208-1264B-7H-6, 125	63.55	69.65	69.65	Splice tie	This study
208-1264B-7H-7, 52	64.32	70.42	70.5	Offsplice adjustment	This study
208-1264B-8H-1, 5	64.35	72.11	72.5	Uncertain tie; Offsplice adjustment	This study
208-1264B-8H-1, 145	65.75	73.51	73.37	Offsplice adjustment	This study
208-1264B-8H-2, 72	66.52	74.28	74.28	Splice tie	This study
208-1264B-8H-7, 10	73.4	81.16	81.16	Splice tie	This study
208-1264B-8H-CC, 11	73.83	81.59	81.61	Offsplice adjustment	This study
208-1264B-9H-1, 2	73.82	82.49	82.6	Offsplice adjustment	This study
208-1264B-9H-1, 27	74.07	82.74	82.9	Offsplice adjustment	This study
208-1264B-9H-1, 101	74.81	83.48	83.55	Offsplice adjustment	This study
208-1264B-9H-2, 125	76.55	85.22	85.34	Offsplice adjustment	This study
208-1264B-9H-3, 12	76.92	85.59	85.75	Offsplice adjustment	This study
208-1264B-9H-3, 36	77.16	85.83	85.94	Offsplice adjustment	This study
208-1264B-9H-3, 51	77.31	85.98	85.98	Splice tie	This study
208-1264B-9H-7, 23	83.03	91.7	91.7	Splice tie	This study
208-1264B-9H-7, 74	83.54	92.21	92.19	Offsplice adjustment	This study
208-1264B-10H-1, 1	83.31	93.19	93.31	Uncertain tie; Offsplice adjustment	This study
208-1264B-10H-1, 27	83.57	93.45	93.52	Offsplice adjustment	This study
208-1264B-10H-1, 56	83.86	93.74	93.72	Offsplice adjustment	This study
208-1264B-10H-2, 73	85.53	95.41	95.27	Offsplice adjustment	This study
208-1264B-10H-3, 32	86.62	96.5	96.5	Splice tie	This study
208-1264B-10H-6, 88	91.57	101.45	101.45	Splice tie	This study
208-1264B-10H-7, 3	92.22	102.1	102.14	Offsplice adjustment	This study
208-1264B-10H-7, 84	93.03	102.91	102.79	Offsplice adjustment	This study
208-1264B-11H-2, 11	93.72	104.16	103.59	Very uncertain tie; Offsplice adjustment	This study
208-1264B-11H-2, 143	95.04	105.48	105.48	Splice tie	This study
208-1264B-11H-8, 39	102.5	112.94	112.94	Splice tie	This study
208-1264B-11H-8, 56	102.67	113.11	113.2	Offsplice adjustment	This study
208-1264B-12H-1, 8	102.38	114.28	113.96	Uncertain tie - difficult core; Offsplice adjustment	This study
208-1264B-12H-4, 36	106.19	118.09	117.99	Difficult core; Offsplice adjustment	This study
208-1264B-12H-4, 61	106.44	118.34	118.34	Splice tie; Difficult core	This study
208-1264B-12H-5, 146	108.79	120.69	120.69	Splice tie; Difficult core	This study
208-1264B-12H-6, 118	110.01	121.91	121.72	Difficult core; Offsplice adjustment	This study
208-1264B-12H-7, 106	111.39	123.29	122.81	Uncertain tie - difficult core; Offsplice adjustment	This study
208-1264B-13H-1, 8	111.88	124.6	124.25	Offsplice adjustment	This study
208-1264B-13H-1, 95	112.75	125.47	125.23	Offsplice adjustment	This study
208-1264B-13H-2, 115	114.45	127.17	127.17	Splice tie	This study
208-1264B-13H-6, 65	119.95	132.67	132.67	Splice tie	This study
208-1264B-13H-CC, 4	121.05	133.77	133.7	Offsplice adjustment	This study
208-1264B-14H-1, 0	121.3	135.48	135.37	Offsplice adjustment	This study
208-1264B-14H-1, 103	122.33	136.51	136.49	Offsplice adjustment	This study
208-1264B-14H-2, 99	123.79	137.97	137.97	Splice tie	This study
208-1264B-14H-6, 87	129.67	143.85	143.85	Splice tie	This study
208-1264B-14H-7, 71	131.01	145.19	145.02	Offsplice adjustment	This study
208-1264B-14H-CC, 0	131.18	145.36	145.3	Uncertain tie; Offsplice adjustment	This study
208-1264B-15H-1, 1	130.81	145.99	146.12	Offsplice adjustment	This study
208-1264B-15H-1, 21	131.01	146.19	146.42	Offsplice adjustment	This study
208-1264B-15H-1, 87	131.67	146.85	147.03	Offsplice adjustment	This study
208-1264B-15H-2, 118	133.48	148.66	148.66	Splice tie	This study
208-1264B-15H-5, 120	138	153.18	153.18	Splice tie	This study
208-1264B-15H-6, 31	138.61	153.79	153.72	Offsplice adjustment	This study
208-1264B-15H-7, 68	139.98	155.16	154.82	Offsplice adjustment	This study
208-1264B-16H-1, 4	140.34	156.72	156.55	Offsplice adjustment	This study
208-1264B-16H-1, 61	140.91	157.29	157.12	Offsplice adjustment	This study
208-1264B-16H-2, 21	142.01	158.39	158.31	Offsplice adjustment	This study
208-1264B-16H-2, 76	142.56	158.94	158.94	Splice tie	This study
208-1264B-16H-5, 123	147.53	163.91	163.91	Splice tie	This study
208-1264B-16H-6, 18	147.98	164.36	164.34	Offsplice adjustment	This study
208-1264B-16H-6, 66	148.46	164.84	164.84	Offsplice adjustment	This study
208-1264B-16H-6, 102	148.82	165.2	165.21	Offsplice adjustment	This study
208-1264B-16H-7, 48	149.48	165.86	165.85	Offsplice adjustment	This study
208-1264B-16H-7, 69	149.69	166.07	166.01	Offsplice adjustment	This study
208-1264B-17H-1, 26	150.06	166.69	166.44	Offsplice adjustment	This study
208-1264B-17H-1, 97	150.77	167.4	166.97	Offsplice adjustment	This study
208-1264B-17H-1, 113	150.93	167.56	167.16	Offsplice adjustment	This study
208-1264B-17H-2, 1	151.31	167.94	167.5	Offsplice adjustment	This study
208-1264B-17H-2, 28	151.58	168.21	168.21	Splice tie	This study
208-1264B-17H-2, 80	152.1	168.73	168.73	Splice tie	This study
208-1264B-17H-5, 90	156.7	173.33	173.33	Offsplice adjustment	This study
208-1264B-17H-7, 104	159.34	175.97	175.53	Offsplice adjustment	This study
208-1264B-18H-1, 7	159.37	177.04	177.06	Offsplice adjustment	This study
208-1264B-18H-1, 52	159.82	177.49	177.49	Splice tie	This study
208-1264B-18H-6, 10	166.9	184.57	184.57	Splice tie	This study
208-1264B-18H-6, 97	167.77	185.44	185.36	Offsplice adjustment	This study
208-1264B-18H-7, 26	168.26	185.93	185.7	Offsplice adjustment	This study
208-1264B-18H-CC, 5	169.05	186.72	186.43	Offsplice adjustment	This study
208-1264B-19H-1, 1	168.81	187.64	187.64	Top of core; Offsplice adjustment	Liebrand et al., 2016 mapping pairs updated to account for composite splice revisions;
208-1264B-19H-3, 5	171.85	190.68	190.68	Splice tie; adjusted by 1 cm from Liebrand et al., 2016	Liebrand et al., 2016 mapping pairs updated to account for composite splice revisions;
208-1264B-19H-6, 100	177.3	196.13	196.13	Splice tie	Liebrand et al., 2016 mapping pairs updated to account for composite splice revisions;
208-1264B-19H-CC, 16	178.41	197.24	197.14	Bottom of core; Offsplice adjustment	Liebrand et al., 2016 mapping pairs updated to account for composite splice revisions;
208-1264B-20H-1, 1	178.31	197.76	197.94	Top of core; Offsplice adjustment	Liebrand et al., 2016 mapping pairs updated to account for composite splice revisions;
208-1264B-20H-2, 55	180.35	199.8	199.8	Splice tie	Liebrand et al., 2016 mapping pairs updated to account for composite splice revisions;
208-1264B-20H-5, 88	185.18	204.63	204.63	Splice tie	Liebrand et al., 2016 mapping pairs updated to account for composite splice revisions;
208-1264B-20H-CC, 18	187.57	207.02	206.88	Bottom of core; Offsplice adjustment	Liebrand et al., 2016 mapping pairs updated to account for composite splice revisions;
208-1264B-21H-1, 0	187.8	207.86	207.69	Top of core; Offsplice adjustment; adjusted by 1 cm from Liebrand et al., 2016	Liebrand et al., 2016 mapping pairs updated to account for composite splice revisions;
208-1264B-21H-1, 33	188.13	208.19	208.09	New tie	This study
208-1264B-21H-2, 28	189.58	209.64	209.54	Offsplice adjustment	Liebrand et al., 2016 mapping pairs updated to account for composite splice revisions;
208-1264B-21H-2, 78	190.08	210.14	210.09	Offsplice adjustment	Liebrand et al., 2016 mapping pairs updated to account for composite splice revisions;
208-1264B-21H-3, 13	190.93	210.99	210.9	Offsplice adjustment	Liebrand et al., 2016 mapping pairs updated to account for composite splice revisions;
208-1264B-21H-3, 82	191.62	211.68	211.68	Splice tie; adjusted by 1 cm from Liebrand et al., 2016	Liebrand et al., 2016 mapping pairs updated to account for composite splice revisions;
208-1264B-21H-5, 75	194.55	214.61	214.61	Splice tie	Liebrand et al., 2016 mapping pairs updated to account for composite splice revisions;
208-1264B-21H-6, 30	195.6	215.66	215.57	Offsplice adjustment	Liebrand et al., 2016 mapping pairs updated to account for composite splice revisions;
208-1264B-21H-6, 115	196.45	216.51	216.61	Offsplice adjustment	Liebrand et al., 2016 mapping pairs updated to account for composite splice revisions;
208-1264B-21H-CC, 14	197.62	217.68	217.5	Bottom of core; IODP ID adjusted; Offsplice adjustment	Liebrand et al., 2016 mapping pairs updated to account for composite splice revisions;
208-1264B-22H-1, 1	197.31	218.06	218.24	Top of core; Offsplice adjustment	Liebrand et al., 2016 mapping pairs updated to account for composite splice revisions;
208-1264B-22H-2, 58	199.38	220.13	220.19	Offsplice adjustment	Liebrand et al., 2016 mapping pairs updated to account for composite splice revisions;
208-1264B-22H-2, 110	199.9	220.65	220.65	Splice tie	Liebrand et al., 2016 mapping pairs updated to account for composite splice revisions;
208-1264B-22H-6, 92	205.72	226.47	226.47	Splice tie; adjusted by 1 cm from Liebrand et al., 2016	Liebrand et al., 2016 mapping pairs updated to account for composite splice revisions;
208-1264B-22H-CC, 18	207.19	227.94	227.73	Bottom of core; Offsplice adjustment	Liebrand et al., 2016 mapping pairs updated to account for composite splice revisions;
208-1264B-23H-1, 1	206.81	228.46	228.46	Top of core; Offsplice adjustment	Liebrand et al., 2016 mapping pairs updated to account for composite splice revisions;
208-1264B-23H-2, 120	209.5	231.15	231.15	Splice tie	Liebrand et al., 2016 mapping pairs updated to account for composite splice revisions;
208-1264B-23H-6, 88	215.18	236.83	236.83	Splice tie	Liebrand et al., 2016 mapping pairs updated to account for composite splice revisions;
208-1264B-23H-CC, 1	216.34	237.99	237.92	Bottom of core; IODP ID adjusted; Offsplice adjustment	Liebrand et al., 2016 mapping pairs updated to account for composite splice revisions;
208-1264B-24H-1, 1	216.31	238.66	239.14	Top of core; Offsplice adjustment	Liebrand et al., 2016 mapping pairs updated to account for composite splice revisions;
208-1264B-24H-2, 65	218.45	240.8	240.94	Offsplice adjustment	Liebrand et al., 2016 mapping pairs updated to account for composite splice revisions;
208-1264B-24H-3, 68	219.98	242.33	242.33	Top of core; Offsplice adjustment	Liebrand et al., 2016 mapping pairs updated to account for composite splice revisions;
208-1264B-24H-6, 102	224.82	247.17	247.17	Splice tie; adjusted by 1 cm from Liebrand et al., 2016	Liebrand et al., 2016 mapping pairs updated to account for composite splice revisions;
208-1264B-24H-CC, 11	226.29	248.64	248.64	Bottom of core; Offsplice adjustment	Liebrand et al., 2016 mapping pairs updated to account for composite splice revisions;
208-1264B-25H-1, 1	225.81	250.17	250.24	Top	Liebrand et al., 2016 mapping pairs updated to account for composite splice revisions;
208-1264B-25H-1, 85	226.65	251.01	251.01	Splice tie	Liebrand et al., 2016 mapping pairs updated to account for composite splice revisions;
208-1264B-25H-5, 58	232.38	256.74	256.74	Splice tie	Liebrand et al., 2016 mapping pairs updated to account for composite splice revisions;
208-1264B-25H-6, 33	233.63	257.99	258.06	Offsplice adjustment	Liebrand et al., 2016 mapping pairs updated to account for composite splice revisions;
208-1264B-25H-7, 8	234.88	259.24	259.17	Offsplice adjustment	Liebrand et al., 2016 mapping pairs updated to account for composite splice revisions;
208-1264B-25H-CC, 9	235.6	259.96	259.9	Bottom of core; IODP ID adjusted; Offsplice adjustment	Liebrand et al., 2016 mapping pairs updated to account for composite splice revisions;
208-1264B-26H-1, 0	235.3	262.5	262.5	Top/Append core; Offsplice adjustment	Liebrand et al., 2016 mapping pairs updated to account for composite splice revisions;
208-1264B-26H-5, 5	241.35	268.55	268.55	Splice tie	Liebrand et al., 2016 mapping pairs updated to account for composite splice revisions;
208-1264B-26H-5, 44	241.74	268.94	268.94	Splice tie	Liebrand et al., 2016 mapping pairs updated to account for composite splice revisions;
208-1264B-26H-6, 59	243.39	270.59	270.22	Offsplice adjustment	Liebrand et al., 2016 mapping pairs updated to account for composite splice revisions;
208-1264B-26H-CC, 36	245.25	272.45	271.79	Bottom of core; Offsplice adjustment	Liebrand et al., 2016 mapping pairs updated to account for composite splice revisions;
208-1264B-27H-1, 1	244.81	273.23	273.24	Top of core; Offsplice adjustment	Liebrand et al., 2016 mapping pairs updated to account for composite splice revisions;
208-1264B-27H-1, 107	245.87	274.29	274.44	Offsplice adjustment	Liebrand et al., 2016 mapping pairs updated to account for composite splice revisions;
208-1264B-27H-2, 60	246.9	275.32	275.32	Splice tie	Liebrand et al., 2016 mapping pairs updated to account for composite splice revisions;
208-1264B-27H-7, 75	254.55	282.97	282.97	Splice tie;	This study
208-1264B-27H-CC, 8	254.66	283.08	283.08	Append/Bottom of core; Offsplice adjustment	Liebrand et al., 2016 mapping pairs updated to account for composite splice revisions;
208-1264B-28H-1, 0	254.3	284.42	284.42	Top/Append core; Splice tie	Liebrand et al., 2016 mapping pairs updated to account for composite splice revisions;
208-1264B-28H-5, 35	260.65	290.77	290.77	Splice tie	Liebrand et al., 2016 mapping pairs updated to account for composite splice revisions;
208-1264B-28H-5, 92	261.22	291.34	291.38	Offsplice adjustment	Liebrand et al., 2016 mapping pairs updated to account for composite splice revisions;
208-1264B-28H-5, 131	261.61	291.73	291.73	Offsplice adjustment	Liebrand et al., 2016 mapping pairs updated to account for composite splice revisions;
208-1264B-28H-6, 83	262.63	292.75	292.43	New tie	This study
208-1264B-28H-CC, 13	263.51	293.63	293.19	Bottom of core; Offsplice adjustment	Liebrand et al., 2016 mapping pairs updated to account for composite splice revisions;
208-1264B-29H-1, 0	263.8	294.75	294.75	Top/Append core; Splice tie	Liebrand et al., 2016 mapping pairs updated to account for composite splice revisions;
208-1264B-29H-2, 108	266.38	297.33	297.33	Splice tie	Liebrand et al., 2016 mapping pairs updated to account for composite splice revisions;
208-1264B-29H-2, 124	266.54	297.49	297.43	Offsplice adjustment	Liebrand et al., 2016 mapping pairs updated to account for composite splice revisions;
208-1264B-29H-3, 94	267.74	298.69	298.59	Offsplice adjustment	Liebrand et al., 2016 mapping pairs updated to account for composite splice revisions;
208-1264B-29H-4, 84	269.14	300.09	299.53	New offsplice adjustment compared to Liebrand et al., 2018/2016	This study
208-1264B-29H-4, 107	269.37	300.32	299.95	New offsplice adjustment compared to Liebrand et al., 2018/2016	This study
208-1264B-29H-5, 8	269.88	300.83	300.4	New offsplice adjustment compared to Liebrand et al., 2018/2016	This study
208-1264B-29H-5, 97	270.77	301.72	301.08	New offsplice adjustment compared to Liebrand et al., 2018/2016	This study
208-1264B-29H-5, 139	271.19	302.14	301.6	New offsplice adjustment compared to Liebrand et al., 2018/2016	This study
208-1264B-29H-6, 144	272.74	303.69	303.53	New offsplice adjustment compared to Liebrand et al., 2018/2016	This study
208-1264B-30H-1, 0	273.3	305.85	305.85	Top/Append core; Splice tie	Liebrand et al., 2016 mapping pairs updated to account for composite splice revisions;
208-1264B-30H-3, 85	277.15	309.7	309.7	Splice tie	Liebrand et al., 2016 mapping pairs updated to account for composite splice revisions;
208-1264B-30H-4, 38	278.18	310.73	310.73	Offsplice adjustment	Liebrand et al., 2016 mapping pairs updated to account for composite splice revisions;
208-1264B-30H-4, 129	279.09	311.64	311.53	Offsplice adjustment	Liebrand et al., 2016 mapping pairs updated to account for composite splice revisions;
208-1264B-30H-5, 77	280.07	312.62	312.55	New tie	This study
208-1264B-30H-6, 121	282.01	314.56	314.63	New tie	This study
208-1264B-30H-7, 74	283.04	315.59	315.74	Bottom of core; Offsplice adjustment	Liebrand et al., 2016 mapping pairs updated to account for composite splice revisions;

## Sheet: 1264C mapping pairs
ODP ID	mbsf	core D21 rmcd	splice D21 rmcd	Tie note	Source
208-1264C-1H-1, 3	0.03	0.13	0.03	Offsplice adjustment	This study
208-1264C-1H-1, 24	0.24	0.34	0.3	Offsplice adjustment	This study
208-1264C-1H-1, 63	0.63	0.73	0.6	Offsplice adjustment	This study
208-1264C-1H-2, 58	2.03	2.13	2.15	Offsplice adjustment	This study
208-1264C-1H-2, 113	2.58	2.68	2.63	Offsplice adjustment	This study
208-1264C-1H-CC, 4	2.86	2.96	2.97	Offsplice adjustment	This study
