# Supplementary material for: Climate, cryosphere and carbon cycle controls on Southeast Atlantic orbital-scale carbonate deposition since the Oligocene (30–0 Ma)
Source: Copernicus journal article supplement (doi:10.5194/cp-17-2091-2021), 2021-10-15
Supplement: Supplementary file 4 [file SI Table S5 - Site 1264-1265 ties.xlsx]

## Sheet: Liebrand 2016 1264-1265 ties
Ties between Sites 1264 and 1265 from Liebrand et al., 2018, updated to the revised composite splice from this study (D21).
The ODP IDs and mbsf of each tie at Sites 1264 and 1265 have also been generated.
Site 1264 ODP ID	Site 1264 mbsf	Site 1264 L16 rmcd (Liebrand et al., 2016)	Site 1264 D21 rmcd (This Study)	Site 1265 ODP ID	Site 1264 mbsf	Site 1265 L16 rmcd (Liebrand et al., 2016)
208-1264-A-20H-2, 33	182.13	207.02	205.06	208-1265A-8H-4, 125	72.25	81.87
208-1264-A-20H-2, 47	182.27	207.16	205.2	208-1265A-8H-4, 139	72.39	82.01
208-1264-A-20H-2, 60	182.4	207.29	205.33	208-1265A-8H-5, 4	72.54	82.16
208-1264-A-20H-2, 73	182.53	207.42	205.46	208-1265A-8H-5, 18	72.68	82.3
208-1264-A-20H-2, 86	182.66	207.55	205.59	208-1265A-8H-5, 33	72.83	82.45
208-1264-A-20H-2, 125	183.05	207.94	205.98	208-1265A-8H-5, 91	73.41	83.03
208-1264-A-20H-3, 41	183.71	208.6	206.64	208-1265A-8H-5, 150	74	83.62
208-1264-A-20H-3, 54	183.84	208.73	206.77	208-1265A-8H-6, 14	74.14	83.76
208-1264-A-20H-3, 67	183.97	208.86	206.9	208-1265A-8H-6, 29	74.29	83.91
208-1264-A-20H-3, 80	184.1	208.99	207.03	208-1265A-8H-6, 43	74.43	84.05
208-1264-A-20H-3, 93	184.23	209.12	207.16	208-1265A-8H-6, 58	74.58	84.2
208-1264-A-20H-3, 107	184.37	209.26	207.3	208-1265A-8H-6, 72	74.72	84.34
208-1264-A-20H-3, 120	184.5	209.39	207.43	208-1265A-8H-6, 87	74.87	84.49
208-1264-A-20H-3, 133	184.63	209.52	207.56	208-1265A-8H-6, 101	75.01	84.63
208-1264-A-20H-4, 9	184.89	209.78	207.82	208-1265B-9H-2, 115	73.85	85.07
208-1264-A-20H-4, 22	185.02	209.91	207.95	208-1265B-9H-2, 130	74	85.22
208-1264-A-20H-4, 61	185.41	210.3	208.34	208-1265B-9H-3, 9	74.29	85.51
208-1264-A-20H-4, 75	185.55	210.44	208.48	208-1265B-9H-3, 23	74.43	85.65
208-1264-A-20H-4, 88	185.68	210.57	208.61	208-1265B-9H-3, 38	74.58	85.8
208-1264-A-20H-4, 101	185.81	210.7	208.74	208-1265B-9H-3, 52	74.72	85.94
208-1264-A-20H-4, 114	185.94	210.83	208.87	208-1265B-9H-3, 67	74.87	86.09
208-1264-A-20H-4, 127	186.07	210.96	209	208-1265B-9H-3, 82	75.02	86.24
208-1264-A-20H-4, 140	186.2	211.09	209.13	208-1265B-9H-3, 96	75.16	86.38
208-1264-A-20H-5, 3	186.33	211.22	209.26	208-1265B-9H-3, 111	75.31	86.53
208-1264-A-20H-5, 16	186.46	211.35	209.39	208-1265B-9H-3, 125	75.45	86.67
208-1264-A-20H-5, 30	186.6	211.49	209.53	208-1265B-9H-3, 140	75.6	86.82
208-1264-A-20H-5, 43	186.73	211.62	209.66	208-1265B-9H-4, 4	75.74	86.96
208-1264-A-20H-5, 108	187.38	212.27	210.31	208-1265B-9H-4, 63	76.33	87.55
208-1264-A-20H-5, 121	187.51	212.4	210.44	208-1265B-9H-4, 77	76.47	87.69
208-1264-A-20H-5, 135	187.65	212.54	210.58	208-1265B-9H-4, 92	76.62	87.84
208-1264-A-20H-5, 148	187.78	212.67	210.71	208-1265B-9H-4, 106	76.76	87.98
208-1264-A-20H-6, 11	187.91	212.8	210.84	208-1265B-9H-4, 121	76.91	88.13
208-1264-A-20H-6, 24	188.04	212.93	210.97	208-1265B-9H-4, 135	77.05	88.27
208-1264-A-20H-6, 37	188.17	213.06	211.1	208-1265B-9H-5, 0	77.2	88.42
208-1264-B-21H-3, 90	191.7	213.72	211.76	208-1265B-9H-5, 58	77.78	89
208-1264-B-21H-3, 142	192.22	214.24	212.28	208-1265A-9H-2, 116	78.66	89.73
208-1264-B-21H-4, 5	192.35	214.37	212.41	208-1265A-9H-2, 131	78.81	89.88
208-1264-B-21H-4, 18	192.48	214.5	212.54	208-1265A-9H-2, 145	78.95	90.02
208-1264-B-21H-4, 84	193.14	215.16	213.2	208-1265A-9H-3, 53	79.53	90.6
208-1264-B-21H-4, 150	193.8	215.82	213.86	208-1265A-9H-3, 112	80.12	91.19
208-1264-B-21H-5, 13	193.93	215.95	213.99	208-1265A-9H-3, 126	80.26	91.33
208-1264-B-21H-5, 26	194.06	216.08	214.12	208-1265A-9H-3, 141	80.41	91.48
208-1264-B-21H-5, 39	194.19	216.21	214.25	208-1265A-9H-4, 5	80.55	91.62
208-1264-B-21H-5, 52	194.32	216.34	214.38	208-1265A-9H-4, 20	80.7	91.77
208-1264-B-21H-5, 65	194.45	216.47	214.51	208-1265A-9H-4, 34	80.84	91.91
208-1264-A-21H-1, 91	190.71	216.6	214.64	208-1265A-9H-4, 49	80.99	92.06
208-1264-A-21H-1, 131	191.11	217	215.04	208-1265A-9H-4, 107	81.57	92.64
208-1264-A-21H-1, 144	191.24	217.13	215.17	208-1265A-9H-4, 122	81.72	92.79
208-1264-A-21H-2, 33	191.63	217.52	215.56	208-1265A-9H-5, 1	82.01	93.08
208-1264-A-21H-2, 99	192.29	218.18	216.22	208-1265A-9H-5, 30	82.3	93.37
208-1264-A-21H-2, 112	192.42	218.31	216.35	208-1265A-9H-5, 45	82.45	93.52
208-1264-A-21H-3, 1	192.81	218.7	216.74	208-1265A-9H-5, 103	83.03	94.1
208-1264-A-21H-3, 41	193.21	219.1	217.14	208-1265B-10H-1, 121	81.91	94.68
208-1264-A-21H-3, 106	193.86	219.75	217.79	208-1265B-10H-2, 29	82.49	95.26
208-1264-A-21H-3, 120	194	219.89	217.93	208-1265B-10H-2, 44	82.64	95.41
208-1264-A-21H-3, 133	194.13	220.02	218.06	208-1265B-10H-2, 58	82.78	95.55
208-1264-A-21H-3, 146	194.26	220.15	218.19	208-1265B-10H-2, 73	82.93	95.7
208-1264-A-21H-4, 61	194.91	220.8	218.84	208-1265B-10H-2, 131	83.51	96.28
208-1264-A-21H-4, 75	195.05	220.94	218.98	208-1265B-10H-2, 146	83.66	96.43
208-1264-A-21H-4, 88	195.18	221.07	219.11	208-1265B-10H-3, 10	83.8	96.57
208-1264-A-21H-4, 101	195.31	221.2	219.24	208-1265B-10H-3, 25	83.95	96.72
208-1264-A-21H-4, 114	195.44	221.33	219.37	208-1265B-10H-3, 39	84.09	96.86
208-1264-A-21H-5, 3	195.83	221.72	219.76	208-1265B-10H-3, 69	84.39	97.16
208-1264-A-21H-5, 56	196.36	222.25	220.29	208-1265B-10H-3, 112	84.82	97.59
208-1264-A-21H-5, 82	196.62	222.51	220.55	208-1265B-10H-3, 127	84.97	97.74
208-1264-B-22H-2, 126	200.06	222.77	220.81	208-1265B-10H-3, 141	85.11	97.88
208-1264-B-22H-2, 139	200.19	222.9	220.94	208-1265B-10H-4, 6	85.26	98.03
208-1264-B-22H-3, 3	200.33	223.04	221.08	208-1265B-10H-4, 21	85.41	98.18
208-1264-B-22H-3, 16	200.46	223.17	221.21	208-1265B-10H-4, 35	85.55	98.32
208-1264-B-22H-3, 29	200.59	223.3	221.34	208-1265B-10H-4, 50	85.7	98.47
208-1264-B-22H-3, 68	200.98	223.69	221.73	208-1265B-10H-4, 79	85.99	98.76
208-1264-B-22H-3, 121	201.51	224.22	222.26	208-1265A-10H-2, 22	87.22	99.19
208-1264-B-22H-4, 23	202.03	224.74	222.78	208-1265A-10H-2, 66	87.66	99.63
208-1264-B-22H-4, 63	202.43	225.14	223.18	208-1265A-10H-2, 95	87.95	99.92
208-1264-B-22H-4, 76	202.56	225.27	223.31	208-1265A-10H-2, 110	88.1	100.07
208-1264-B-22H-4, 89	202.69	225.4	223.44	208-1265A-10H-2, 124	88.24	100.21
208-1264-B-22H-4, 102	202.82	225.53	223.57	208-1265A-10H-2, 139	88.39	100.36
208-1264-B-22H-4, 115	202.95	225.66	223.7	208-1265A-10H-3, 4	88.54	100.51
208-1264-B-22H-5, 4	203.34	226.05	224.09	208-1265A-10H-3, 33	88.83	100.8
208-1264-B-22H-5, 57	203.87	226.58	224.62	208-1265A-10H-3, 76	89.26	101.23
208-1264-B-22H-5, 96	204.26	226.97	225.01	208-1265A-10H-3, 105	89.55	101.52
208-1264-B-22H-5, 136	204.66	227.37	225.41	208-1265A-10H-3, 135	89.85	101.82
208-1264-B-22H-6, 25	205.05	227.76	225.8	208-1265A-10H-4, 14	90.14	102.11
208-1264-B-22H-6, 64	205.44	228.15	226.19	208-1265A-10H-4, 43	90.43	102.4
208-1264-A-22H-2, 115	201.95	228.81	226.85	208-1265A-10H-4, 101	91.01	102.98
208-1264-A-22H-2, 128	202.08	228.94	226.98	208-1265A-10H-4, 116	91.16	103.13
208-1264-A-22H-2, 141	202.21	229.07	227.11	208-1265A-10H-4, 130	91.3	103.27
208-1264-A-22H-3, 4	202.34	229.2	227.24	208-1265A-10H-4, 145	91.45	103.42
208-1264-A-22H-3, 31	202.61	229.47	227.51	208-1265A-10H-5, 9	91.59	103.56
208-1264-A-22H-3, 70	203	229.86	227.9	208-1265A-10H-5, 24	91.74	103.71
208-1264-A-22H-3, 96	203.26	230.12	228.16	208-1265A-10H-5, 38	91.88	103.85
208-1264-A-22H-3, 109	203.39	230.25	228.29	208-1265A-10H-5, 53	92.03	104
208-1264-A-22H-3, 122	203.52	230.38	228.42	208-1265A-10H-5, 68	92.18	104.15
208-1264-A-22H-3, 136	203.66	230.52	228.56	208-1265A-10H-5, 82	92.32	104.29
208-1264-A-22H-3, 149	203.79	230.65	228.69	208-1265A-10H-5, 97	92.47	104.44
208-1264-A-22H-4, 12	203.92	230.78	228.82	208-1265A-10H-5, 111	92.61	104.58
208-1264-A-22H-4, 25	204.05	230.91	228.95	208-1265A-10H-5, 126	92.76	104.73
208-1264-A-22H-4, 38	204.18	231.04	229.08	208-1265A-10H-5, 140	92.9	104.87
208-1264-A-22H-4, 51	204.31	231.17	229.21	208-1265A-10H-6, 5	93.05	105.02
208-1264-A-22H-4, 117	204.97	231.83	229.87	208-1265A-10H-6, 63	93.63	105.6
208-1264-A-22H-4, 130	205.1	231.96	230	208-1265A-10H-6, 78	93.78	105.75
208-1264-A-22H-4, 143	205.23	232.09	230.13	208-1265A-10H-6, 92	93.92	105.89
208-1264-A-22H-5, 6	205.36	232.22	230.26	208-1265A-10H-6, 107	94.07	106.04
208-1264-A-22H-5, 19	205.49	232.35	230.39	208-1265A-10H-6, 121	94.21	106.18
208-1264-A-22H-5, 32	205.62	232.48	230.52	208-1265A-10H-6, 136	94.36	106.33
208-1264-A-22H-5, 46	205.76	232.62	230.66	208-1265B-11H-2, 145	93.15	106.47
208-1264-A-22H-5, 59	205.89	232.75	230.79	208-1265B-11H-3, 10	93.3	106.62
208-1264-A-22H-5, 72	206.02	232.88	230.92	208-1265B-11H-3, 25	93.45	106.77
208-1264-A-22H-5, 85	206.15	233.01	231.05	208-1265B-11H-3, 39	93.59	106.91
208-1264-B-23H-2, 149	209.79	233.4	231.44	208-1265B-11H-3, 68	93.88	107.2
208-1264-B-23H-3, 39	210.19	233.8	231.84	208-1265B-11H-3, 97	94.17	107.49
208-1264-B-23H-3, 91	210.71	234.32	232.36	208-1265B-11H-3, 141	94.61	107.93
208-1264-B-23H-4, 7	211.37	234.98	233.02	208-1265B-11H-4, 49	95.19	108.51
208-1264-B-23H-4, 20	211.5	235.11	233.15	208-1265B-11H-4, 64	95.34	108.66
208-1264-B-23H-4, 33	211.63	235.24	233.28	208-1265B-11H-4, 78	95.48	108.8
208-1264-B-23H-4, 46	211.76	235.37	233.41	208-1265B-11H-4, 93	95.63	108.95
208-1264-B-23H-4, 59	211.89	235.5	233.54	208-1265B-11H-4, 108	95.78	109.1
208-1264-B-23H-4, 72	212.02	235.63	233.67	208-1265A-11H-1, 57	95.57	109.24
208-1264-B-23H-4, 125	212.55	236.16	234.2	208-1265A-11H-1, 101	96.01	109.68
208-1264-B-23H-5, 41	213.21	236.82	234.86	208-1265A-11H-2, 9	96.59	110.26
208-1264-B-23H-5, 54	213.34	236.95	234.99	208-1265A-11H-2, 24	96.74	110.41
208-1264-B-23H-5, 67	213.47	237.08	235.12	208-1265A-11H-2, 38	96.88	110.55
208-1264-B-23H-5, 80	213.6	237.21	235.25	208-1265A-11H-2, 53	97.03	110.7
208-1264-B-23H-5, 93	213.73	237.34	235.38	208-1265A-11H-2, 67	97.17	110.84
208-1264-B-23H-5, 106	213.86	237.47	235.51	208-1265A-11H-2, 82	97.32	110.99
208-1264-B-23H-5, 119	213.99	237.6	235.64	208-1265A-11H-2, 96	97.46	111.13
208-1264-B-23H-6, 22	214.52	238.13	236.17	208-1265A-11H-2, 140	97.9	111.57
208-1264-B-23H-6, 61	214.91	238.52	236.56	208-1265A-11H-3, 19	98.19	111.86
208-1264-A-23H-2, 121	211.51	239.18	237.22	208-1265A-11H-3, 63	98.63	112.3
208-1264-A-23H-3, 23	212.03	239.7	237.74	208-1265A-11H-3, 107	99.07	112.74
208-1264-A-23H-3, 89	212.69	240.36	238.4	208-1265A-11H-4, 15	99.65	113.32
208-1264-A-23H-3, 141	213.21	240.88	238.92	208-1265A-11H-4, 88	100.38	114.05
208-1264-A-23H-4, 31	213.61	241.28	239.32	208-1265A-11H-4, 117	100.67	114.34
208-1264-A-23H-4, 83	214.13	241.8	239.84	208-1265A-11H-5, 10	101.1	114.77
208-1264-A-23H-4, 149	214.79	242.46	240.5	208-1265A-11H-5, 69	101.69	115.36
208-1264-A-23H-5, 64	215.44	243.11	241.15	208-1265A-11H-5, 127	102.27	115.94
208-1264-A-23H-5, 78	215.58	243.25	241.29	208-1265A-11H-5, 141	102.41	116.08
208-1264-A-23H-5, 91	215.71	243.38	241.42	208-1265A-11H-6, 6	102.56	116.23
208-1264-A-23H-5, 130	216.1	243.77	241.81	208-1265A-11H-6, 64	103.14	116.81
208-1264-B-24H-3, 82	220.12	244.43	242.47	208-1265A-11H-6, 122	103.72	117.39
208-1264-B-24H-3, 106	220.36	244.67	242.71	208-1265B-12H-3, 61	103.31	117.66
208-1264-B-24H-3, 129	220.59	244.9	242.94	208-1265B-12H-3, 84	103.54	117.89
208-1264-B-24H-4, 2	220.82	245.13	243.17	208-1265B-12H-3, 106	103.76	118.11
208-1264-B-24H-4, 10	220.9	245.21	243.25	208-1265B-12H-3, 115	103.85	118.2
208-1264-B-24H-4, 18	220.98	245.29	243.33	208-1265B-12H-3, 124	103.94	118.29
208-1264-B-24H-4, 26	221.06	245.37	243.41	208-1265B-12H-3, 133	104.03	118.38
208-1264-B-24H-4, 34	221.14	245.45	243.49	208-1265B-12H-3, 142	104.12	118.47
208-1264-B-24H-4, 41	221.21	245.52	243.56	208-1265B-12H-4, 4	104.21	118.56
208-1264-B-24H-4, 65	221.45	245.76	243.8	208-1265B-12H-4, 26	104.43	118.78
208-1264-B-24H-4, 88	221.68	245.99	244.03	208-1265B-12H-4, 49	104.66	119.01
208-1264-B-24H-4, 96	221.76	246.07	244.11	208-1265B-12H-4, 58	104.75	119.1
208-1264-B-24H-4, 119	221.99	246.3	244.34	208-1265B-12H-4, 80	104.97	119.32
208-1264-B-24H-4, 135	222.15	246.46	244.5	208-1265B-12H-4, 94	105.11	119.46
208-1264-B-24H-4, 150	222.3	246.61	244.65	208-1265B-12H-4, 107	105.24	119.59
208-1264-B-24H-5, 24	222.54	246.85	244.89	208-1265B-12H-4, 125	105.42	119.77
208-1264-B-24H-5, 47	222.77	247.08	245.12	208-1265B-12H-4, 143	105.6	119.95
208-1264-B-24H-5, 62	222.92	247.23	245.27	208-1265B-12H-5, 6	105.73	120.08
208-1264-B-24H-5, 86	223.16	247.47	245.51	208-1265B-12H-5, 29	105.96	120.31
208-1264-B-24H-5, 94	223.24	247.55	245.59	208-1265B-12H-5, 38	106.05	120.4
208-1264-B-24H-5, 101	223.31	247.62	245.66	208-1265B-12H-5, 47	106.14	120.49
208-1264-B-24H-5, 117	223.47	247.78	245.82	208-1265B-12H-5, 60	106.27	120.62
208-1264-B-24H-5, 133	223.63	247.94	245.98	208-1265B-12H-5, 73	106.4	120.75
208-1264-B-24H-6, 6	223.86	248.17	246.21	208-1265B-12H-5, 96	106.63	120.98
208-1264-B-24H-6, 29	224.09	248.4	246.44	208-1265B-12H-5, 118	106.85	121.2
208-1264-B-24H-6, 45	224.25	248.56	246.6	208-1265B-12H-5, 132	106.99	121.34
208-1264-B-24H-6, 53	224.33	248.64	246.68	208-1265B-12H-5, 136	107.03	121.38
208-1264-B-24H-6, 76	224.56	248.87	246.91	208-1265B-12H-5, 145	107.12	121.47
208-1264-A-24H-2, 19	219.99	249.26	247.3	208-1265B-12H-6, 9	107.26	121.61
208-1264-A-24H-2, 27	220.07	249.34	247.38	208-1265B-12H-6, 13	107.3	121.65
208-1264-A-24H-2, 34	220.14	249.41	247.45	208-1265B-12H-6, 18	107.35	121.7
208-1264-A-24H-2, 42	220.22	249.49	247.53	208-1265B-12H-6, 22	107.39	121.74
208-1264-A-24H-2, 73	220.53	249.8	247.84	208-1265A-12H-2, 110	107.1	121.96
208-1264-A-24H-2, 81	220.61	249.88	247.92	208-1265A-12H-2, 115	107.15	122.01
208-1264-A-24H-2, 89	220.69	249.96	248	208-1265A-12H-2, 119	107.19	122.05
208-1264-A-24H-2, 112	220.92	250.19	248.23	208-1265A-12H-2, 137	107.37	122.23
208-1264-A-24H-2, 128	221.08	250.35	248.39	208-1265A-12H-3, 1	107.51	122.37
208-1264-A-24H-2, 135	221.15	250.42	248.46	208-1265A-12H-3, 10	107.6	122.46
208-1264-A-24H-2, 143	221.23	250.5	248.54	208-1265A-12H-3, 19	107.69	122.55
208-1264-A-24H-3, 1	221.31	250.58	248.62	208-1265A-12H-3, 28	107.78	122.64
208-1264-A-24H-3, 24	221.54	250.81	248.85	208-1265A-12H-3, 50	108	122.86
208-1264-A-24H-3, 40	221.7	250.97	249.01	208-1265A-12H-3, 63	108.13	122.99
208-1264-A-24H-3, 63	221.93	251.2	249.24	208-1265A-12H-3, 81	108.31	123.17
208-1264-A-24H-3, 87	222.17	251.44	249.48	208-1265A-12H-3, 99	108.49	123.35
208-1264-A-24H-3, 102	222.32	251.59	249.63	208-1265A-12H-3, 113	108.63	123.49
208-1264-A-24H-3, 125	222.55	251.82	249.86	208-1265A-12H-3, 135	108.85	123.71
208-1264-A-24H-3, 149	222.79	252.06	250.1	208-1265A-12H-4, 7	109.07	123.93
208-1264-A-24H-4, 14	222.94	252.21	250.25	208-1265A-12H-4, 21	109.21	124.07
208-1264-A-24H-4, 45	223.25	252.52	250.56	208-1265A-12H-4, 43	109.43	124.29
208-1264-A-24H-4, 53	223.33	252.6	250.64	208-1265A-12H-4, 48	109.48	124.34
208-1264-A-24H-4, 61	223.41	252.68	250.72	208-1265A-12H-4, 52	109.52	124.38
208-1264-B-25H-1, 87	226.67	252.99	251.03	208-1265A-12H-4, 75	109.75	124.61
208-1264-B-25H-1, 118	226.98	253.3	251.34	208-1265A-12H-4, 97	109.97	124.83
208-1264-B-25H-1, 126	227.06	253.38	251.42	208-1265A-12H-4, 101	110.01	124.87
208-1264-B-25H-1, 134	227.14	253.46	251.5	208-1265A-12H-4, 106	110.06	124.92
208-1264-B-25H-1, 142	227.22	253.54	251.58	208-1265A-12H-4, 110	110.1	124.96
208-1264-B-25H-1, 149	227.29	253.61	251.65	208-1265A-12H-4, 115	110.15	125.01
208-1264-B-25H-2, 7	227.37	253.69	251.73	208-1265A-12H-4, 119	110.19	125.05
208-1264-B-25H-2, 15	227.45	253.77	251.81	208-1265A-12H-4, 124	110.24	125.1
208-1264-B-25H-2, 23	227.53	253.85	251.89	208-1265A-12H-4, 128	110.28	125.14
208-1264-B-25H-2, 30	227.6	253.92	251.96	208-1265A-12H-4, 133	110.33	125.19
208-1264-B-25H-2, 38	227.68	254	252.04	208-1265A-12H-4, 137	110.37	125.23
208-1264-B-25H-2, 69	227.99	254.31	252.35	208-1265A-12H-5, 10	110.6	125.46
208-1264-B-25H-2, 101	228.31	254.63	252.67	208-1265A-12H-5, 32	110.82	125.68
208-1264-B-25H-2, 132	228.62	254.94	252.98	208-1265A-12H-5, 54	111.04	125.9
208-1264-B-25H-3, 13	228.93	255.25	253.29	208-1265A-12H-5, 77	111.27	126.13
208-1264-B-25H-3, 21	229.01	255.33	253.37	208-1265A-12H-5, 81	111.31	126.17
208-1264-B-25H-3, 28	229.08	255.4	253.44	208-1265A-12H-5, 86	111.36	126.22
208-1264-B-25H-3, 36	229.16	255.48	253.52	208-1265A-12H-5, 90	111.4	126.26
208-1264-B-25H-3, 44	229.24	255.56	253.6	208-1265A-12H-5, 95	111.45	126.31
208-1264-B-25H-3, 67	229.47	255.79	253.83	208-1265B-13H-1, 138	110.58	126.49
208-1264-B-25H-3, 83	229.63	255.95	253.99	208-1265B-13H-2, 1	110.71	126.62
208-1264-B-25H-3, 106	229.86	256.18	254.22	208-1265B-13H-2, 23	110.93	126.84
208-1264-B-25H-3, 122	230.02	256.34	254.38	208-1265B-13H-2, 37	111.07	126.98
208-1264-B-25H-3, 145	230.25	256.57	254.61	208-1265B-13H-2, 55	111.25	127.16
208-1264-B-25H-4, 18	230.48	256.8	254.84	208-1265B-13H-2, 73	111.43	127.34
208-1264-B-25H-4, 42	230.72	257.04	255.08	208-1265B-13H-2, 91	111.61	127.52
208-1264-B-25H-4, 73	231.03	257.35	255.39	208-1265B-13H-2, 113	111.83	127.74
208-1264-B-25H-4, 104	231.34	257.66	255.7	208-1265B-13H-2, 135	112.05	127.96
208-1264-B-25H-4, 112	231.42	257.74	255.78	208-1265B-13H-2, 140	112.1	128.01
208-1264-B-25H-4, 119	231.49	257.81	255.85	208-1265B-13H-2, 144	112.14	128.05
208-1264-B-25H-4, 127	231.57	257.89	255.93	208-1265B-13H-2, 149	112.19	128.1
208-1264-B-25H-4, 135	231.65	257.97	256.01	208-1265B-13H-3, 3	112.23	128.14
208-1264-B-25H-4, 143	231.73	258.05	256.09	208-1265B-13H-3, 8	112.28	128.19
208-1264-B-25H-5, 1	231.81	258.13	256.17	208-1265B-13H-3, 12	112.32	128.23
208-1264-B-25H-5, 8	231.88	258.2	256.24	208-1265B-13H-3, 17	112.37	128.28
208-1264-B-25H-5, 16	231.96	258.28	256.32	208-1265B-13H-3, 21	112.41	128.32
208-1264-B-25H-5, 47	232.27	258.59	256.63	208-1265B-13H-3, 44	112.64	128.55
208-1264-A-25H-1, 37	228.17	258.83	256.87	208-1265B-13H-3, 62	112.82	128.73
208-1264-A-25H-1, 52	228.32	258.98	257.02	208-1265B-13H-3, 75	112.95	128.86
208-1264-A-25H-1, 75	228.55	259.21	257.25	208-1265B-13H-3, 97	113.17	129.08
208-1264-A-25H-1, 99	228.79	259.45	257.49	208-1265B-13H-3, 115	113.35	129.26
208-1264-A-25H-1, 107	228.87	259.53	257.57	208-1265B-13H-3, 120	113.4	129.31
208-1264-A-25H-1, 114	228.94	259.6	257.64	208-1265B-13H-3, 124	113.44	129.35
208-1264-A-25H-1, 122	229.02	259.68	257.72	208-1265B-13H-3, 129	113.49	129.4
208-1264-A-25H-1, 130	229.1	259.76	257.8	208-1265B-13H-3, 133	113.53	129.44
208-1264-A-25H-1, 138	229.18	259.84	257.88	208-1265B-13H-3, 138	113.58	129.49
208-1264-A-25H-1, 145	229.25	259.91	257.95	208-1265B-13H-3, 142	113.62	129.53
208-1264-A-25H-2, 19	229.49	260.15	258.19	208-1265B-13H-4, 10	113.8	129.71
208-1264-A-25H-2, 34	229.64	260.3	258.34	208-1265B-13H-4, 23	113.93	129.84
208-1264-A-25H-2, 58	229.88	260.54	258.58	208-1265B-13H-4, 46	114.16	130.07
208-1264-A-25H-2, 81	230.11	260.77	258.81	208-1265B-13H-4, 68	114.38	130.29
208-1264-A-25H-2, 97	230.27	260.93	258.97	208-1265B-13H-4, 82	114.52	130.43
208-1264-A-25H-2, 120	230.5	261.16	259.2	208-1265B-13H-4, 100	114.7	130.61
208-1264-A-25H-2, 135	230.65	261.31	259.35	208-1265B-13H-4, 113	114.83	130.74
208-1264-A-25H-3, 1	230.81	261.47	259.51	208-1265B-13H-4, 126	114.96	130.87
208-1264-A-25H-3, 17	230.97	261.63	259.67	208-1265B-13H-4, 140	115.1	131.01
208-1264-A-25H-3, 32	231.12	261.78	259.82	208-1265B-13H-5, 3	115.23	131.14
208-1264-A-25H-3, 48	231.28	261.94	259.98	208-1265B-13H-5, 17	115.37	131.28
208-1264-A-25H-3, 71	231.51	262.17	260.21	208-1265B-13H-5, 39	115.59	131.5
208-1264-A-25H-3, 79	231.59	262.25	260.29	208-1265B-13H-5, 48	115.68	131.59
208-1264-A-25H-9, 12	231.74	262.4	260.44	208-1265B-13H-5, 71	115.91	131.82
208-1264-A-25H-9, 28	231.9	262.56	260.6	208-1265B-13H-5, 93	116.13	132.04
		262.64	260.68	208-1265B-13H-5, 102	116.22	132.13
		262.79	260.83	208-1265A-13H-2, 97	116.47	132.26
		263.03	261.07	208-1265A-13H-2, 115	116.65	132.44
		263.34	261.38	208-1265A-13H-2, 138	116.88	132.67
		263.65	261.69	208-1265A-13H-3, 10	117.1	132.89
		263.73	261.77	208-1265A-13H-3, 14	117.14	132.93
		263.8	261.84	208-1265A-13H-3, 19	117.19	132.98
		263.88	261.92	208-1265A-13H-3, 23	117.23	133.02
		263.96	262	208-1265A-13H-3, 28	117.28	133.07
		264.04	262.08	208-1265A-13H-3, 32	117.32	133.11
		264.12	262.16	208-1265A-13H-3, 37	117.37	133.16
		264.19	262.23	208-1265A-13H-3, 41	117.41	133.2
		264.27	262.31	208-1265A-13H-3, 46	117.46	133.25
		264.35	262.39	208-1265A-13H-3, 50	117.5	133.29
		264.43	262.47	208-1265A-13H-3, 55	117.55	133.34
208-1264-B-26H-1, 4	235.34	264.5	262.54	208-1265A-13H-3, 59	117.59	133.38
208-1264-B-26H-1, 36	235.66	264.82	262.86	208-1265A-13H-3, 82	117.82	133.61
208-1264-B-26H-1, 51	235.81	264.97	263.01	208-1265A-13H-3, 95	117.95	133.74
208-1264-B-26H-1, 67	235.97	265.13	263.17	208-1265A-13H-3, 109	118.09	133.88
208-1264-B-26H-1, 82	236.12	265.28	263.32	208-1265A-13H-3, 122	118.22	134.01
208-1264-B-26H-1, 106	236.36	265.52	263.56	208-1265A-13H-3, 140	118.4	134.19
208-1264-B-26H-1, 113	236.43	265.59	263.63	208-1265A-13H-3, 144	118.44	134.23
208-1264-B-26H-1, 121	236.51	265.67	263.71	208-1265A-13H-3, 149	118.49	134.28
208-1264-B-26H-1, 129	236.59	265.75	263.79	208-1265A-13H-4, 3	118.53	134.32
208-1264-B-26H-2, 18	236.98	266.14	264.18	208-1265A-13H-4, 21	118.71	134.5
208-1264-B-26H-2, 26	237.06	266.22	264.26	208-1265A-13H-4, 26	118.76	134.55
208-1264-B-26H-2, 41	237.21	266.37	264.41	208-1265A-13H-4, 39	118.89	134.68
208-1264-B-26H-2, 64	237.44	266.6	264.64	208-1265A-13H-4, 62	119.12	134.91
208-1264-B-26H-2, 80	237.6	266.76	264.8	208-1265A-13H-4, 75	119.25	135.04
208-1264-B-26H-2, 103	237.83	266.99	265.03	208-1265A-13H-4, 97	119.47	135.26
208-1264-B-26H-2, 127	238.07	267.23	265.27	208-1265A-13H-4, 120	119.7	135.49
208-1264-B-26H-2, 142	238.22	267.38	265.42	208-1265A-13H-4, 133	119.83	135.62
208-1264-B-26H-3, 8	238.38	267.54	265.58	208-1265A-13H-4, 147	119.97	135.76
208-1264-B-26H-3, 23	238.53	267.69	265.73	208-1265A-13H-5, 10	120.1	135.89
208-1264-B-26H-3, 39	238.69	267.85	265.89	208-1265A-13H-5, 23	120.23	136.02
208-1264-B-26H-3, 54	238.84	268	266.04	208-1265A-13H-5, 37	120.37	136.16
208-1264-B-26H-3, 78	239.08	268.24	266.28	208-1265A-13H-5, 59	120.59	136.38
208-1264-B-26H-3, 101	239.31	268.47	266.51	208-1265B-14H-1, 93	119.63	136.61
208-1264-B-26H-3, 124	239.54	268.7	266.74	208-1265B-14H-1, 115	119.85	136.83
208-1264-B-26H-3, 132	239.62	268.78	266.82	208-1265B-14H-1, 124	119.94	136.92
208-1264-B-26H-3, 140	239.7	268.86	266.9	208-1265B-14H-1, 133	120.03	137.01
208-1264-B-26H-4, 6	239.86	269.02	267.06	208-1265B-14H-1, 146	120.16	137.14
208-1264-B-26H-4, 13	239.93	269.09	267.13	208-1265B-14H-2, 1	120.21	137.19
208-1264-B-26H-4, 52	240.32	269.48	267.52	208-1265B-14H-2, 19	120.39	137.37
208-1264-B-26H-4, 91	240.71	269.87	267.91	208-1265B-14H-2, 37	120.57	137.55
208-1264-B-26H-4, 99	240.79	269.95	267.99	208-1265B-14H-2, 41	120.61	137.59
208-1264-B-26H-4, 107	240.87	270.03	268.07	208-1265B-14H-2, 46	120.66	137.64
208-1264-B-26H-4, 115	240.95	270.11	268.15	208-1265B-14H-2, 50	120.7	137.68
208-1264-B-26H-4, 122	241.02	270.18	268.22	208-1265B-14H-2, 55	120.75	137.73
208-1264-B-26H-5, 3	241.33	270.49	268.53	208-1265B-14H-2, 77	120.97	137.95
208-1264-A-26H-1, 57	237.87	270.57	268.61	208-1265B-14H-2, 81	121.01	137.99
208-1264-A-26H-1, 65	237.95	270.65	268.69	208-1265B-14H-2, 86	121.06	138.04
208-1264-A-26H-1, 73	238.03	270.73	268.77	208-1265B-14H-2, 90	121.1	138.08
208-1264-A-26H-1, 81	238.11	270.81	268.85	208-1265B-14H-2, 95	121.15	138.13
208-1264-A-26H-1, 112	238.42	271.12	269.16	208-1265B-14H-2, 117	121.37	138.35
208-1264-A-26H-1, 143	238.73	271.43	269.47	208-1265B-14H-2, 140	121.6	138.58
208-1264-A-26H-2, 1	238.81	271.51	269.55	208-1265B-14H-2, 144	121.64	138.62
208-1264-A-26H-2, 8	238.88	271.58	269.62	208-1265B-14H-2, 149	121.69	138.67
208-1264-A-26H-2, 16	238.96	271.66	269.7	208-1265B-14H-3, 3	121.73	138.71
208-1264-A-26H-2, 24	239.04	271.74	269.78	208-1265B-14H-3, 8	121.78	138.76
208-1264-A-26H-2, 32	239.12	271.82	269.86	208-1265B-14H-3, 12	121.82	138.8
208-1264-A-26H-2, 39	239.19	271.89	269.93	208-1265B-14H-3, 17	121.87	138.85
208-1264-A-26H-2, 47	239.27	271.97	270.01	208-1265B-14H-3, 21	121.91	138.89
208-1264-A-26H-2, 55	239.35	272.05	270.09	208-1265B-14H-3, 26	121.96	138.94
208-1264-A-26H-2, 63	239.43	272.13	270.17	208-1265B-14H-3, 30	122	138.98
208-1264-A-26H-2, 94	239.74	272.44	270.48	208-1265B-14H-3, 52	122.22	139.2
208-1264-A-26H-2, 102	239.82	272.52	270.56	208-1265B-14H-3, 57	122.27	139.25
208-1264-A-26H-2, 109	239.89	272.59	270.63	208-1265B-14H-3, 61	122.31	139.29
208-1264-A-26H-2, 117	239.97	272.67	270.71	208-1265B-14H-3, 66	122.36	139.34
208-1264-A-26H-2, 125	240.05	272.75	270.79	208-1265B-14H-3, 70	122.4	139.38
208-1264-A-26H-2, 133	240.13	272.83	270.87	208-1265B-14H-3, 75	122.45	139.43
208-1264-A-26H-2, 141	240.21	272.91	270.95	208-1265B-14H-3, 79	122.49	139.47
208-1264-A-26H-2, 148	240.28	272.98	271.02	208-1265B-14H-3, 84	122.54	139.52
208-1264-A-26H-3, 22	240.52	273.22	271.26	208-1265B-14H-3, 102	122.72	139.7
208-1264-A-26H-3, 37	240.67	273.37	271.41	208-1265B-14H-3, 115	122.85	139.83
208-1264-A-26H-3, 61	240.91	273.61	271.65	208-1265B-14H-3, 137	123.07	140.05
208-1264-A-26H-3, 84	241.14	273.84	271.88	208-1265B-14H-4, 10	123.3	140.28
208-1264-A-26H-3, 99	241.29	273.99	272.03	208-1265B-14H-4, 23	123.43	140.41
208-1264-A-26H-3, 123	241.53	274.23	272.27	208-1265B-14H-4, 41	123.61	140.59
208-1264-A-26H-3, 131	241.61	274.31	272.35	208-1265B-14H-4, 46	123.66	140.64
208-1264-A-26H-4, 12	241.92	274.62	272.66	208-1265B-14H-4, 59	123.79	140.77
208-1264-A-26H-4, 35	242.15	274.85	272.89	208-1265B-14H-4, 68	123.88	140.86
208-1264-A-26H-4, 74	242.54	275.24	273.28	208-1265B-14H-4, 82	124.02	141
208-1264-A-26H-4, 113	242.93	275.63	273.67	208-1265B-14H-4, 95	124.15	141.13
208-1264-A-26H-5, 2	243.32	276.02	274.06	208-1265B-14H-4, 108	124.28	141.26
208-1264-A-26H-5, 25	243.55	276.25	274.29	208-1265B-14H-4, 117	124.37	141.35
208-1264-A-26H-5, 56	243.86	276.56	274.6	208-1265B-14H-4, 131	124.51	141.49
208-1264-A-26H-5, 95	244.25	276.95	274.99	208-1265B-14H-4, 149	124.69	141.67
208-1264-A-26H-5, 103	244.33	277.03	275.07	208-1265B-14H-5, 3	124.73	141.71
208-1264-B-27H-2, 66	246.96	277.34	275.38	208-1265B-14H-5, 26	124.96	141.94
208-1264-B-27H-2, 74	247.04	277.42	275.46	208-1265B-14H-5, 30	125	141.98
208-1264-B-27H-2, 113	247.43	277.81	275.85	208-1265B-14H-5, 48	125.18	142.16
208-1264-B-27H-3, 2	247.82	278.2	276.24	208-1265B-14H-5, 66	125.36	142.34
208-1264-B-27H-3, 40	248.2	278.58	276.62	208-1265B-14H-5, 84	125.54	142.52
208-1264-B-27H-3, 48	248.28	278.66	276.7	208-1265B-14H-5, 88	125.58	142.56
208-1264-B-27H-3, 56	248.36	278.74	276.78	208-1265B-14H-5, 93	125.63	142.61
208-1264-B-27H-3, 64	248.44	278.82	276.86	208-1265B-14H-5, 97	125.67	142.65
208-1264-B-27H-3, 72	248.52	278.9	276.94	208-1265B-14H-5, 102	125.72	142.7
208-1264-B-27H-3, 79	248.59	278.97	277.01	208-1265B-14H-5, 106	125.76	142.74
208-1264-B-27H-3, 118	248.98	279.36	277.4	208-1265B-14H-5, 124	125.94	142.92
208-1264-B-27H-4, 7	249.37	279.75	277.79	208-1265A-14H-2, 76	125.76	143.1
208-1264-B-27H-4, 15	249.45	279.83	277.87	208-1265A-14H-2, 80	125.8	143.14
208-1264-B-27H-4, 23	249.53	279.91	277.95	208-1265A-14H-2, 85	125.85	143.19
208-1264-B-27H-4, 46	249.76	280.14	278.18	208-1265A-14H-2, 103	126.03	143.37
208-1264-B-27H-4, 62	249.92	280.3	278.34	208-1265A-14H-2, 116	126.16	143.5
208-1264-B-27H-4, 77	250.07	280.45	278.49	208-1265A-14H-2, 130	126.3	143.64
208-1264-B-27H-4, 93	250.23	280.61	278.65	208-1265A-14H-2, 143	126.43	143.77
208-1264-B-27H-4, 108	250.38	280.76	278.8	208-1265A-14H-3, 7	126.57	143.91
208-1264-B-27H-4, 124	250.54	280.92	278.96	208-1265A-14H-3, 20	126.7	144.04
208-1264-B-27H-4, 139	250.69	281.07	279.11	208-1265A-14H-3, 33	126.83	144.17
208-1264-B-27H-5, 5	250.85	281.23	279.27	208-1265A-14H-3, 47	126.97	144.31
208-1264-B-27H-5, 20	251	281.38	279.42	208-1265A-14H-3, 60	127.1	144.44
208-1264-B-27H-5, 44	251.24	281.62	279.66	208-1265A-14H-3, 83	127.33	144.67
208-1264-B-27H-5, 59	251.39	281.77	279.81	208-1265A-14H-3, 96	127.46	144.8
208-1264-B-27H-5, 67	251.47	281.85	279.89	208-1265A-14H-3, 101	127.51	144.85
208-1264-B-27H-5, 75	251.55	281.93	279.97	208-1265A-14H-3, 105	127.55	144.89
208-1264-B-27H-5, 83	251.63	282.01	280.05	208-1265A-14H-3, 110	127.6	144.94
208-1264-B-27H-5, 90	251.7	282.08	280.12	208-1265A-14H-3, 114	127.64	144.98
208-1264-B-27H-5, 98	251.78	282.16	280.2	208-1265A-14H-3, 119	127.69	145.03
208-1264-B-27H-5, 106	251.86	282.24	280.28	208-1265A-14H-3, 123	127.73	145.07
208-1264-B-27H-5, 114	251.94	282.32	280.36	208-1265A-14H-3, 127	127.77	145.11
208-1264-B-27H-5, 122	252.02	282.4	280.44	208-1265A-14H-3, 132	127.82	145.16
208-1264-B-27H-5, 129	252.09	282.47	280.51	208-1265A-14H-3, 136	127.86	145.2
208-1264-B-27H-5, 137	252.17	282.55	280.59	208-1265A-14H-3, 141	127.91	145.25
208-1264-B-27H-6, 18	252.48	282.86	280.9	208-1265A-14H-4, 4	128.04	145.38
208-1264-B-27H-6, 42	252.72	283.1	281.14	208-1265A-14H-4, 13	128.13	145.47
208-1264-B-27H-6, 65	252.95	283.33	281.37	208-1265A-14H-4, 22	128.22	145.56
208-1264-B-27H-6, 96	253.26	283.64	281.68	208-1265A-14H-4, 36	128.36	145.7
208-1264-B-27H-6, 127	253.57	283.95	281.99	208-1265A-14H-4, 49	128.49	145.83
208-1264-B-27H-7, 16	253.96	284.34	282.38	208-1265A-14H-4, 67	128.67	146.01
208-1264-B-27H-7, 24	254.04	284.42	282.46	208-1265A-14H-4, 72	128.72	146.06
208-1264-B-27H-7, 32	254.12	284.5	282.54	208-1265A-14H-4, 76	128.76	146.1
208-1264-B-27H-7, 39	254.19	284.57	282.61	208-1265A-14H-4, 80	128.8	146.14
208-1264-B-27H-7, 78	254.58	284.96	283	208-1265A-14H-4, 98	128.98	146.32
208-1264-B-27H-9, 8	254.66	285.04	283.08	208-1265A-14H-4, 103	129.03	146.37
		285.35	283.39	208-1265A-14H-4, 125	129.25	146.59
		285.59	283.63	208-1265A-14H-4, 143	129.43	146.77
		285.82	283.86	208-1265A-14H-5, 11	129.61	146.95
		285.9	283.94	208-1265A-14H-5, 16	129.66	147
		286.29	284.33	208-1265A-14H-5, 33	129.83	147.17
		286.36	284.4	208-1265A-14H-5, 38	129.88	147.22
208-1264-B-28H-1, 6	254.36	286.44	284.48	208-1265A-14H-5, 42	129.92	147.26
208-1264-B-28H-1, 14	254.44	286.52	284.56	208-1265A-14H-5, 47	129.97	147.31
208-1264-B-28H-1, 22	254.52	286.6	284.64	208-1265A-14H-5, 51	130.01	147.35
208-1264-B-28H-1, 29	254.59	286.67	284.71	208-1265A-14H-5, 56	130.06	147.4
208-1264-B-28H-1, 37	254.67	286.75	284.79	208-1265A-14H-5, 60	130.1	147.44
208-1264-B-28H-1, 68	254.98	287.06	285.1	208-1265A-14H-5, 83	130.33	147.67
208-1264-B-28H-1, 99	255.29	287.37	285.41	208-1265A-14H-5, 105	130.55	147.89
208-1264-B-28H-1, 107	255.37	287.45	285.49	208-1265A-14H-5, 110	130.6	147.94
208-1264-B-28H-1, 115	255.45	287.53	285.57	208-1265A-14H-5, 114	130.64	147.98
208-1264-B-28H-2, 4	255.84	287.92	285.96	208-1265A-14H-5, 132	130.82	148.16
208-1264-B-28H-2, 12	255.92	288	286.04	208-1265A-14H-5, 136	130.86	148.2
208-1264-B-28H-2, 43	256.23	288.31	286.35	208-1265B-15H-2, 56	130.26	148.43
208-1264-B-28H-2, 51	256.31	288.39	286.43	208-1265B-15H-2, 60	130.3	148.47
208-1264-B-28H-2, 58	256.38	288.46	286.5	208-1265B-15H-2, 65	130.35	148.52
208-1264-B-28H-2, 97	256.77	288.85	286.89	208-1265B-15H-2, 83	130.53	148.7
208-1264-B-28H-2, 128	257.08	289.16	287.2	208-1265B-15H-2, 96	130.66	148.83
208-1264-B-28H-3, 9	257.39	289.47	287.51	208-1265B-15H-2, 110	130.8	148.97
208-1264-B-28H-3, 17	257.47	289.55	287.59	208-1265B-15H-2, 114	130.84	149.01
208-1264-B-28H-3, 48	257.78	289.86	287.9	208-1265B-15H-2, 136	131.06	149.23
208-1264-B-28H-3, 56	257.86	289.94	287.98	208-1265B-15H-2, 141	131.11	149.28
208-1264-B-28H-3, 95	258.25	290.33	288.37	208-1265B-15H-3, 9	131.29	149.46
208-1264-B-28H-3, 134	258.64	290.72	288.76	208-1265B-15H-3, 27	131.47	149.64
208-1264-B-28H-3, 142	258.72	290.8	288.84	208-1265B-15H-3, 31	131.51	149.68
208-1264-B-28H-4, 0	258.8	290.88	288.92	208-1265B-15H-3, 36	131.56	149.73
208-1264-B-28H-4, 7	258.87	290.95	288.99	208-1265B-15H-3, 40	131.6	149.77
208-1264-B-28H-4, 15	258.95	291.03	289.07	208-1265B-15H-3, 45	131.65	149.82
208-1264-B-28H-4, 23	259.03	291.11	289.15	208-1265B-15H-3, 49	131.69	149.86
208-1264-B-28H-4, 54	259.34	291.42	289.46	208-1265B-15H-3, 72	131.92	150.09
208-1264-B-28H-4, 93	259.73	291.81	289.85	208-1265B-15H-3, 89	132.09	150.26
208-1264-B-28H-4, 132	260.12	292.2	290.24	208-1265B-15H-3, 107	132.27	150.44
208-1264-B-28H-5, 21	260.51	292.59	290.63	208-1265B-15H-3, 125	132.45	150.62
208-1264-B-28H-5, 28	260.58	292.66	290.7	208-1265B-15H-3, 130	132.5	150.67
208-1264-A-28H-2, 2	257.82	292.74	290.78	208-1265B-15H-3, 134	132.54	150.71
208-1264-A-28H-2, 10	257.9	292.82	290.86	208-1265B-15H-3, 139	132.59	150.76
208-1264-A-28H-2, 18	257.98	292.9	290.94	208-1265B-15H-3, 143	132.63	150.8
208-1264-A-28H-2, 26	258.06	292.98	291.02	208-1265B-15H-3, 148	132.68	150.85
208-1264-A-28H-2, 33	258.13	293.05	291.09	208-1265B-15H-4, 2	132.72	150.89
208-1264-A-28H-2, 41	258.21	293.13	291.17	208-1265B-15H-4, 7	132.77	150.94
208-1264-A-28H-2, 72	258.52	293.44	291.48	208-1265B-15H-4, 29	132.99	151.16
208-1264-A-28H-2, 80	258.6	293.52	291.56	208-1265B-15H-4, 34	133.04	151.21
208-1264-A-28H-2, 88	258.68	293.6	291.64	208-1265B-15H-4, 38	133.08	151.25
208-1264-A-28H-2, 96	258.76	293.68	291.72	208-1265B-15H-4, 42	133.12	151.29
208-1264-A-28H-2, 127	259.07	293.99	292.03	208-1265B-15H-4, 65	133.35	151.52
208-1264-A-28H-2, 134	259.14	294.06	292.1	208-1265B-15H-4, 69	133.39	151.56
208-1264-A-28H-2, 142	259.22	294.14	292.18	208-1265B-15H-4, 74	133.44	151.61
208-1264-A-28H-3, 0	259.3	294.22	292.26	208-1265B-15H-4, 78	133.48	151.65
208-1264-A-28H-3, 16	259.46	294.38	292.42	208-1265B-15H-4, 92	133.62	151.79
208-1264-A-28H-3, 23	259.53	294.45	292.49	208-1265B-15H-4, 101	133.71	151.88
208-1264-A-28H-3, 31	259.61	294.53	292.57	208-1265B-15H-4, 110	133.8	151.97
208-1264-A-28H-3, 47	259.77	294.69	292.73	208-1265B-15H-4, 132	134.02	152.19
208-1264-A-28H-3, 54	259.84	294.76	292.8	208-1265B-15H-4, 141	134.11	152.28
208-1264-A-28H-3, 70	260	294.92	292.96	208-1265B-15H-5, 4	134.24	152.41
208-1264-A-28H-3, 78	260.08	295	293.04	208-1265B-15H-5, 9	134.29	152.46
208-1264-A-28H-3, 86	260.16	295.08	293.12	208-1265B-15H-5, 13	134.33	152.5
208-1264-A-28H-3, 93	260.23	295.15	293.19	208-1265B-15H-5, 18	134.38	152.55
208-1264-A-28H-3, 101	260.31	295.23	293.27	208-1265B-15H-5, 22	134.42	152.59
208-1264-A-28H-3, 124	260.54	295.46	293.5	208-1265B-15H-5, 40	134.6	152.77
208-1264-A-28H-3, 140	260.7	295.62	293.66	208-1265B-15H-5, 54	134.74	152.91
208-1264-A-28H-4, 13	260.93	295.85	293.89	208-1265B-15H-5, 72	134.92	153.09
208-1264-A-28H-4, 29	261.09	296.01	294.05	208-1265B-15H-5, 85	135.05	153.22
208-1264-A-28H-4, 52	261.32	296.24	294.28	208-1265B-15H-5, 107	135.27	153.44
208-1264-A-28H-9, 7	261.56	296.48	294.52	208-1265A-15H-1, 138	134.38	153.67
208-1264-A-28H-9, 22	261.71	296.63	294.67	208-1265A-15H-2, 1	134.51	153.8
208-1264-B-29H-1, 16	263.96	296.87	294.91	208-1265A-15H-2, 19	134.69	153.98
208-1264-B-29H-1, 23	264.03	296.94	294.98	208-1265A-15H-2, 28	134.78	154.07
208-1264-B-29H-1, 31	264.11	297.02	295.06	208-1265A-15H-2, 37	134.87	154.16
208-1264-B-29H-1, 54	264.34	297.25	295.29	208-1265A-15H-2, 55	135.05	154.34
208-1264-B-29H-1, 86	264.66	297.57	295.61	208-1265A-15H-2, 77	135.27	154.56
208-1264-B-29H-1, 117	264.97	297.88	295.92	208-1265A-15H-2, 100	135.5	154.79
208-1264-B-29H-2, 6	265.36	298.27	296.31	208-1265A-15H-2, 118	135.68	154.97
208-1264-B-29H-2, 44	265.74	298.65	296.69	208-1265A-15H-2, 136	135.86	155.15
208-1264-B-29H-2, 52	265.82	298.73	296.77	208-1265A-15H-2, 140	135.9	155.19
208-1264-B-29H-2, 60	265.9	298.81	296.85	208-1265A-15H-2, 145	135.95	155.24
208-1264-B-29H-2, 99	266.29	299.2	297.24	208-1265A-15H-3, 12	136.12	155.41
208-1264-B-29H-2, 107	266.37	299.28	297.32	208-1265A-15H-3, 17	136.17	155.46
208-1264-A-29H-2, 32	263.52	299.43	297.47	208-1265A-15H-3, 30	136.3	155.59
208-1264-A-29H-2, 40	263.6	299.51	297.55	208-1265A-15H-3, 39	136.39	155.68
208-1264-A-29H-2, 48	263.68	299.59	297.63	208-1265A-15H-3, 44	136.44	155.73
208-1264-A-29H-2, 79	263.99	299.9	297.94	208-1265A-15H-3, 57	136.57	155.86
208-1264-A-29H-2, 110	264.3	300.21	298.25	208-1265A-15H-3, 71	136.71	156
208-1264-A-29H-2, 141	264.61	300.52	298.56	208-1265A-15H-3, 84	136.84	156.13
208-1264-A-29H-3, 22	264.92	300.83	298.87	208-1265A-15H-3, 98	136.98	156.27
208-1264-A-29H-3, 61	265.31	301.22	299.26	208-1265A-15H-3, 115	137.15	156.44
208-1264-A-29H-3, 69	265.39	301.3	299.34	208-1265A-15H-3, 120	137.2	156.49
208-1264-A-29H-3, 100	265.7	301.61	299.65	208-1265A-15H-3, 142	137.42	156.71
208-1264-A-29H-3, 116	265.86	301.77	299.81	208-1265A-15H-4, 6	137.56	156.85
208-1264-A-29H-3, 139	266.09	302	300.04	208-1265A-15H-4, 28	137.78	157.07
208-1264-A-29H-4, 12	266.32	302.23	300.27	208-1265A-15H-4, 51	138.01	157.3
208-1264-A-29H-4, 28	266.48	302.39	300.43	208-1265A-15H-4, 64	138.14	157.43
208-1264-A-29H-4, 43	266.63	302.54	300.58	208-1265A-15H-4, 77	138.27	157.56
208-1264-A-29H-4, 51	266.71	302.62	300.66	208-1265A-15H-4, 82	138.32	157.61
208-1264-A-29H-4, 59	266.79	302.7	300.74	208-1265A-15H-4, 86	138.36	157.65
208-1264-A-29H-4, 67	266.87	302.78	300.82	208-1265A-15H-4, 91	138.41	157.7
208-1264-A-29H-4, 82	267.02	302.93	300.97	208-1265A-15H-4, 104	138.54	157.83
208-1264-A-29H-4, 90	267.1	303.01	301.05	208-1265A-15H-4, 113	138.63	157.92
208-1264-A-29H-4, 106	267.26	303.17	301.21	208-1265B-16H-1, 84	138.54	158.15
208-1264-A-29H-4, 121	267.41	303.32	301.36	208-1265B-16H-1, 106	138.76	158.37
208-1264-A-29H-4, 129	267.49	303.4	301.44	208-1265B-16H-1, 115	138.85	158.46
208-1264-A-29H-4, 137	267.57	303.48	301.52	208-1265B-16H-1, 119	138.89	158.5
208-1264-A-29H-5, 2	267.72	303.63	301.67	208-1265B-16H-1, 124	138.94	158.55
208-1264-A-29H-5, 41	268.11	304.02	302.06	208-1265B-16H-1, 133	139.03	158.64
208-1264-A-29H-5, 57	268.27	304.18	302.22	208-1265B-16H-1, 137	139.07	158.68
208-1264-A-29H-5, 96	268.66	304.57	302.61	208-1265B-16H-2, 1	139.21	158.82
208-1264-A-29H-5, 119	268.89	304.8	302.84	208-1265B-16H-2, 10	139.3	158.91
208-1264-A-29H-5, 150	269.2	305.11	303.15	208-1265B-16H-2, 23	139.43	159.04
208-1264-A-29H-6, 8	269.28	305.19	303.23	208-1265B-16H-2, 28	139.48	159.09
208-1264-A-29H-6, 16	269.36	305.27	303.31	208-1265B-16H-2, 32	139.52	159.13
208-1264-A-29H-6, 23	269.43	305.34	303.38	208-1265B-16H-2, 37	139.57	159.18
208-1264-A-29H-6, 55	269.75	305.66	303.7	208-1265B-16H-2, 59	139.79	159.4
208-1264-A-29H-6, 62	269.82	305.73	303.77	208-1265B-16H-2, 63	139.83	159.44
208-1264-A-29H-6, 70	269.9	305.81	303.85	208-1265B-16H-2, 68	139.88	159.49
208-1264-A-29H-6, 78	269.98	305.89	303.93	208-1265B-16H-2, 72	139.92	159.53
208-1264-A-29H-6, 86	270.06	305.97	304.01	208-1265B-16H-2, 77	139.97	159.58
208-1264-A-29H-6, 93	270.13	306.04	304.08	208-1265B-16H-2, 81	140.01	159.62
208-1264-A-29H-6, 101	270.21	306.12	304.16	208-1265B-16H-2, 86	140.06	159.67
208-1264-A-29H-6, 132	270.52	306.43	304.47	208-1265B-16H-2, 108	140.28	159.89
208-1264-A-29H-6, 140	270.6	306.51	304.55	208-1265B-16H-2, 113	140.33	159.94
208-1264-A-29H-7, 21	270.91	306.82	304.86	208-1265B-16H-2, 126	140.46	160.07
208-1264-A-29H-7, 45	271.15	307.06	305.1	208-1265B-16H-2, 135	140.55	160.16
208-1264-A-29H-7, 68	271.38	307.29	305.33	208-1265B-16H-2, 144	140.64	160.25
208-1264-A-29H-9, 7	271.46	307.37	305.41	208-1265B-16H-2, 149	140.69	160.3
		307.68	305.72	208-1265B-16H-3, 21	140.91	160.52
208-1264-B-30H-1, 18	273.48	307.99	306.03	208-1265B-16H-3, 43	141.13	160.74
208-1264-B-30H-1, 49	273.79	308.3	306.34	208-1265B-16H-3, 66	141.36	160.97
208-1264-B-30H-1, 80	274.1	308.61	306.65	208-1265B-16H-3, 88	141.58	161.19
208-1264-B-30H-1, 88	274.18	308.69	306.73	208-1265B-16H-3, 93	141.63	161.24
208-1264-B-30H-1, 96	274.26	308.77	306.81	208-1265B-16H-3, 97	141.67	161.28
208-1264-B-30H-1, 103	274.33	308.84	306.88	208-1265B-16H-3, 102	141.72	161.33
208-1264-B-30H-1, 142	274.72	309.23	307.27	208-1265B-16H-3, 119	141.89	161.5
208-1264-B-30H-2, 23	275.03	309.54	307.58	208-1265B-16H-3, 142	142.12	161.73
208-1264-B-30H-2, 55	275.35	309.86	307.9	208-1265B-16H-4, 14	142.34	161.95
208-1264-B-30H-2, 78	275.58	310.09	308.13	208-1265B-16H-4, 32	142.52	162.13
208-1264-B-30H-2, 139	276.19	310.7	308.74	208-1265B-16H-4, 58	142.78	162.39
208-1264-B-30H-3, 16	276.46	310.97	309.01	208-1265B-16H-4, 72	142.92	162.53
208-1264-B-30H-3, 81	277.11	311.62	309.66	208-1265A-16H-1, 54	143.04	162.97
208-1264-A-30H-3, 86	275.06	312.15	310.19	208-1265A-16H-1, 97	143.47	163.4
208-1264-A-30H-3, 125	275.45	312.54	310.58	208-1265A-16H-1, 127	143.77	163.7
208-1264-A-30H-4, 14	275.84	312.93	310.97	208-1265A-16H-2, 6	144.06	163.99
208-1264-A-30H-4, 54	276.24	313.33	311.37	208-1265A-16H-2, 35	144.35	164.28
208-1264-A-30H-4, 67	276.37	313.46	311.5	208-1265A-16H-2, 49	144.49	164.42
208-1264-A-30H-4, 80	276.5	313.59	311.63	208-1265A-16H-2, 64	144.64	164.57
208-1264-A-30H-4, 93	276.63	313.72	311.76	208-1265A-16H-2, 78	144.78	164.71
208-1264-A-30H-4, 106	276.76	313.85	311.89	208-1265A-16H-2, 93	144.93	164.86
208-1264-A-30H-4, 119	276.89	313.98	312.02	208-1265A-16H-2, 108	145.08	165.01
208-1264-A-30H-4, 133	277.03	314.12	312.16	208-1265A-16H-2, 122	145.22	165.15
208-1264-A-30H-5, 9	277.29	314.38	312.42	208-1265A-16H-2, 137	145.37	165.3
208-1264-A-30H-5, 74	277.94	315.03	313.07	208-1265A-16H-3, 16	145.66	165.59
208-1264-A-30H-5, 114	278.34	315.43	313.47	208-1265A-16H-3, 30	145.8	165.73
208-1264-A-30H-6, 3	278.73	315.82	313.86	208-1265A-16H-3, 45	145.95	165.88
208-1264-A-30H-6, 69	279.39	316.48	314.52	208-1265A-16H-3, 74	146.24	166.17
208-1264-A-30H-6, 82	279.52	316.61	314.65	208-1265A-16H-3, 89	146.39	166.32
208-1264-A-30H-6, 121	279.91	317	315.04	208-1265A-16H-3, 147	146.97	166.9
208-1264-A-30H-7, 11	280.31	317.4	315.44	208-1265A-16H-4, 55	147.55	167.48
208-1264-A-30H-7, 24	280.44	317.53	315.57	208-1265A-16H-4, 70	147.7	167.63
208-1264-A-30H-7, 37	280.57	317.66	315.7	208-1265A-16H-4, 84	147.84	167.77
208-1264-A-30H-7, 50	280.7	317.79	315.83	208-1265A-16H-4, 99	147.99	167.92
