# Supplementary material for: Climate, cryosphere and carbon cycle controls on Southeast Atlantic orbital-scale carbonate deposition since the Oligocene (30–0 Ma)
Source: Copernicus journal article supplement (doi:10.5194/cp-17-2091-2021), 2021-10-15
Supplement: Supplementary file 5 [file SI Table S6 - Weighted bio-pmag datums.xlsx]

## Sheet: Weighted bio-pmag datum-summary
Selected (i.e. high-quality) bio- and magnetostratigraphic events for Site 1264, updated to the new composite depth scale from this study.
Prior to fitting, the datums were weighted accordingly: from 30-10 Ma, datums selected by Liebrand et al., 2016 were weighted at 10 and all others were weighted at 0; from 10-0 Ma, nannofossil datums with a depth error <1 m, between 1-2 m and >2 m were weighted at 10, 3 and 0 respectively, and planktonic foraminiferal datums with a depth error <2 m, between 2-5 m and >5 m were weighted at 10, 3 a…
Event/Datum	Hole	Type	D21 Depth (armcd)	D21 uncertainty (armcd)	Age GTS 2012 (Ma)	Weighting	Source
Origin	N/A	Forced	0	0	0	10	Shipboard Scientific Party Leg 208, 2004a
B Emiliania huxleyi	C	Nanno	0.76	0.77	0.29	10	Shipboard Scientific Party Leg 208, 2004a
T Globoturborotalita obliquus	C-C	PForam	0.76	0.76	1.3	10	Shipboard Scientific Party Leg 208, 2004a
T Globorotalia tosaensis	C-C	PForam	0.76	0.76	0.61	10	Shipboard Scientific Party Leg 208, 2004a
T Pseudoemiliania lacunosa	C	Nanno	2.3	0.77	0.44	10	Shipboard Scientific Party Leg 208, 2004a
T Large Gephyrocapsa spp.	A	Nanno	6.41	0.25	1.24	10	Shipboard Scientific Party Leg 208, 2004a
B Large Gephyrocapsa spp.	A	Nanno	8.41	0.25	1.62	10	Shipboard Scientific Party Leg 208, 2004a
T Calcidiscus macintyrei	A	Nanno	9.41	0.25	1.6	10	Shipboard Scientific Party Leg 208, 2004a
T Globoturborotalita apertura	B-A	PForam	9.84	2.47	1.64	0	Shipboard Scientific Party Leg 208, 2004a
T Globigerinoides extremus	B-A	PForam	9.84	2.47	1.98	0	Shipboard Scientific Party Leg 208, 2004a
B Medium Gephyrocapsa spp.	A	Nanno	9.91	0.25	1.73	10	Shipboard Scientific Party Leg 208, 2004a
T Discoaster brouweri and D. triradiatus	A	Nanno	11.41	0.25	1.95	10	Shipboard Scientific Party Leg 208, 2004a
T Discoaster pentaradiatus	B	Nanno	12.76	5.4	2.39	0	Shipboard Scientific Party Leg 208, 2004a
B Medium Gephyrocapsa spp.	B	Nanno	12.76	5.4	1.73	0	Shipboard Scientific Party Leg 208, 2004a
B Large Gephyrocapsa spp.	B	Nanno	12.76	5.4	1.62	0	Shipboard Scientific Party Leg 208, 2004a
T Calcidiscus macintyrei	B	Nanno	12.76	5.4	1.6	0	Shipboard Scientific Party Leg 208, 2004a
T Discoaster brouweri and D. triradiatus	B	Nanno	12.76	5.4	1.95	0	Shipboard Scientific Party Leg 208, 2004a
T Discoaster surculus	B	Nanno	12.76	5.4	2.49	0	Shipboard Scientific Party Leg 208, 2004a
T Discoaster pentaradiatus	A	Nanno	15.67	0.36	2.39	10	Shipboard Scientific Party Leg 208, 2004a
T Discoaster surculus	A	Nanno	16.51	0.48	2.49	10	Shipboard Scientific Party Leg 208, 2004a
T Discoaster tamalis	A	Nanno	18.13	0.4	2.8	10	Shipboard Scientific Party Leg 208, 2004a
T Globoturborotalita woodi	B-A	PForam	20.72	2.55	2.3	3	Shipboard Scientific Party Leg 208, 2004a
T Menardella miocenica	B-A	PForam	20.72	2.55	2.39	3	Shipboard Scientific Party Leg 208, 2004a
B Globorotalia truncatulinoides	B-A	PForam	20.72	2.55	1.93	3	Shipboard Scientific Party Leg 208, 2004a
T Discoaster tamalis	B	Nanno	23.7	5.54	2.8	0	Shipboard Scientific Party Leg 208, 2004a
T Sphaeroidinellopsis seminulina	A-B	PForam	26.26	3	3.16	3	Shipboard Scientific Party Leg 208, 2004a
B Globorotalia miocenica	A-B	PForam	26.26	3	3.77	3	Shipboard Scientific Party Leg 208, 2004a
B Globorotalia tosaensis	A-B	PForam	26.26	3	3.35	3	Shipboard Scientific Party Leg 208, 2004a
T Dentoglobigerina altispira	A-B	PForam	26.26	3	3.13	3	Shipboard Scientific Party Leg 208, 2004a
T Sphenolithus spp.	B	Nanno	29.24	0.35	3.54	10	Shipboard Scientific Party Leg 208, 2004a
T Reticulofenestra pseudoumbilicus	A	Nanno	30.74	0.35	3.7	10	Shipboard Scientific Party Leg 208, 2004a
T Sphenolithus spp.	A	Nanno	34.46	5.22	3.54	0	Shipboard Scientific Party Leg 208, 2004a
T Reticulofenestra pseudoumbilicus	B	Nanno	34.46	5.22	3.7	0	Shipboard Scientific Party Leg 208, 2004a
T Amaurolithus spp. (Amaurolithus primus NOT tricorniculatus)	A	Nanno	34.89	1.02	4.5	3	Shipboard Scientific Party Leg 208, 2004a
T Globorotalia margariae	A-B	PForam	42.4	2.71	3.85	3	Shipboard Scientific Party Leg 208, 2004a
T Amaurolithus spp. (Amaurolithus primus NOT tricorniculatus)	B	Nanno	44.78	5.1	4.5	0	Shipboard Scientific Party Leg 208, 2004a
T Globorotalia cibaoensis	A-B	PForam	47.5	2.39	4.61	3	Shipboard Scientific Party Leg 208, 2004a
T Globorotalia plesiotumida	A-B	PForam	47.5	2.39	3.77	3	Shipboard Scientific Party Leg 208, 2004a
T Globoturborotalita nepenthes	B-A	PForam	52.96	3.07	4.37	3	Shipboard Scientific Party Leg 208, 2004a
B Globorotalia crassaformis s.l.	B-A	PForam	52.96	3.07	4.31	3	Shipboard Scientific Party Leg 208, 2004a
B Sphaeroidinella dehiscens s.l.	A	PForam	64.34	1.19	5.53	10	Shipboard Scientific Party Leg 208, 2004a
B Globorotalia tumida	A	PForam	75.74	1.57	5.72	10	Shipboard Scientific Party Leg 208, 2004a
B Ceratolithus acutus	A	Nanno	76.6	0.3	5.35	10	Shipboard Scientific Party Leg 208, 2004a
T Nicklithus amplificus	A	Nanno	76.91	0.01	5.94	10	Shipboard Scientific Party Leg 208, 2004a
B Globigerinoides conglobatus	A	PForam	77.57	0.26	6.2	10	Shipboard Scientific Party Leg 208, 2004a
B Globoconella conomiozea	A-B	PForam	79.76	1.92	7.89	3	Shipboard Scientific Party Leg 208, 2004a
B Nicklithus amplificus	B	Nanno	82.97	0.4	6.79	10	Shipboard Scientific Party Leg 208, 2004a
B Amaurolithus primus	B	Nanno	108.17	5.22	7.42	0	Shipboard Scientific Party Leg 208, 2004a
B Amaurolithus primus	A	Nanno	109.34	0.58	7.42	10	Shipboard Scientific Party Leg 208, 2004a
B Globorotalia cibaoensis	B-A	PForam	116.44	3.02	9.44	3	Shipboard Scientific Party Leg 208, 2004a
B Paracme Reticulofenestra pseudoumbilicus	A	Nanno	119.71	0.26	8.79	10	Shipboard Scientific Party Leg 208, 2004a
B Globorotalia plesiotumida	A-B	PForam	121.24	1.78	8.58	10	Shipboard Scientific Party Leg 208, 2004a
B Globigerinoides extremus	A-B	PForam	131.51	2.25	8.93	3	Shipboard Scientific Party Leg 208, 2004a
T Discoaster neohamatus dominance	B	Nanno	139.61	5.85	9.53	0	Shipboard Scientific Party Leg 208, 2004a
T Discoaster neohamatus dominance	A	Nanno	139.9	0.17	9.53	10	Shipboard Scientific Party Leg 208, 2004a
T Catinaster calyculus	A	Nanno	142.61	0.39	9.67	10	Shipboard Scientific Party Leg 208, 2004a
T Paragloborotalia mayeri (subtropical)	A-B	PForam	142.78	2.7	10.46	3	Shipboard Scientific Party Leg 208, 2004a
B Globorotalia juanai	A-B	PForam	142.78	2.7	9.69	3	Shipboard Scientific Party Leg 208, 2004a
T Paragloborotalia mayeri	A-B	PForam	142.78	2.7	10.46	3	Shipboard Scientific Party Leg 208, 2004a
B Discoaster neohamatus	A	Nanno	145.49	1.1	9.76	3	Shipboard Scientific Party Leg 208, 2004a
B Discoaster bellus gr. (= B D. hamatus)	A	Nanno	146.99	0.4	10.4	0	Shipboard Scientific Party Leg 208, 2004a
B Discoaster bellus gr. (= B D. hamatus)	B	Nanno	150.2	4.75	10.4	0	Shipboard Scientific Party Leg 208, 2004a
B Globigerina apertura	B-A	PForam	157.47	2.52	11.18	0	Shipboard Scientific Party Leg 208, 2004a
B Catinaster coalitus	A	Nanno	159.57	0.2	10.89	0	Shipboard Scientific Party Leg 208, 2004a
T Coccolithus miopelagicus	B	Nanno	160.53	5.58	10.97	0	Shipboard Scientific Party Leg 208, 2004a
B Catinaster coalitus	B	Nanno	160.53	5.58	10.89	0	Shipboard Scientific Party Leg 208, 2004a
T Coccolithus miopelagicus	A	Nanno	167.73	0.35	10.97	0	Shipboard Scientific Party Leg 208, 2004a
TC Discoaster kugleri	A	Nanno	175.38	5.18	11.58	0	Shipboard Scientific Party Leg 208, 2004a
BC Discoaster kugleri	A	Nanno	175.38	5.18	11.9	0	Shipboard Scientific Party Leg 208, 2004a
B Globoturborotalita nepenthes	B-A	PForam	178.07	2.5	11.63	0	Shipboard Scientific Party Leg 208, 2004a
B Globigerina decoraperta	B-A	PForam	178.07	2.5	11.49	0	Shipboard Scientific Party Leg 208, 2004a
T Sphenolithus heteromorphus	B	Nanno	181.03	5.48	13.53	0	Shipboard Scientific Party Leg 208, 2004a
B Triquetrorhabdulus rugosus	B	Nanno	181.03	5.48	13.27	0	Shipboard Scientific Party Leg 208, 2004a
B Triquetrorhabdulus rugosus	A	Nanno	182.62	0.45	13.27	10	Shipboard Scientific Party Leg 208, 2004a
B Menardella praemenardii	A-B	PForam	183.54	2.97	14.38	0	Shipboard Scientific Party Leg 208, 2004a
T Menardella archeomenardii	A-B	PForam	183.54	2.97	13.87	0	Shipboard Scientific Party Leg 208, 2004a
T Fohsella peripheroronda	A-B	PForam	183.54	2.97	13.8	0	Shipboard Scientific Party Leg 208, 2004a
T Hirsutella praescitula	A-B	PForam	183.54	2.97	13.73	0	Shipboard Scientific Party Leg 208, 2004a
T Sphenolithus heteromorphus	A	Nanno	185.06	0.4	13.53	10	Shipboard Scientific Party Leg 208, 2004a
B Fohsella peripheroacuta	B-A	PForam	188.67	2.16	14.24	10	Shipboard Scientific Party Leg 208, 2004a
T Praeorbulina sicana	A	PForam	191.62	0.79	14.53	10	Shipboard Scientific Party Leg 208, 2004a
T Praeorbulina circularis	A	PForam	191.62	0.79	14.89	0	Shipboard Scientific Party Leg 208, 2004a
B Orbulina spp.	A	PForam	193.29	0.88		0	Shipboard Scientific Party Leg 208, 2004a
B Orbulina suturalis	A	PForam	193.29	0.88	15.1	10	Shipboard Scientific Party Leg 208, 2004a
B Praeorbulina circularis	A	PForam	195.12	0.94	15.96	0	Shipboard Scientific Party Leg 208, 2004a
B Discoaster signus gr.	A	Nanno	196.55	0.4	15.85	0	Shipboard Scientific Party Leg 208, 2004a
T Acme Discoaster deflandrei	A	Nanno	196.55	0.4	15.8	0	Shipboard Scientific Party Leg 208, 2004a
B Praeorbulina glomerosa	A-B	PForam	198.12	0.54	16.27	0	Shipboard Scientific Party Leg 208, 2004a
B Menardella archeomenardii	A-B	PForam	199.56	0.48	16.26	0	Shipboard Scientific Party Leg 208, 2004a
B Praeorbulina sicana	B-A	PForam	200.31	0.27	16.38	0	Shipboard Scientific Party Leg 208, 2004a
T Catapsydrax dissimilis	B-A	PForam	201.63	0.09	17.54	0	Shipboard Scientific Party Leg 208, 2004a
T Sphenolithus belemnos	A	Nanno	208.53	0.4	17.95	0	Shipboard Scientific Party Leg 208, 2004a
B Sphenolithus heteromorphus	A	Nanno	208.53	0.4	17.71	10	Shipboard Scientific Party Leg 208, 2004a
C5En (o)	N/A	PmagL16	212.26	0.18	18.524	10	Liebrand et al., 2016
B Sphenolithus heteromorphus	B	Nanno	212.34	5.33	17.71	0	Shipboard Scientific Party Leg 208, 2004a
T Globoquadrina binaiensis	B-A	PForam	212.38	0.73	19.09	0	Shipboard Scientific Party Leg 208, 2004a
C6n (y)	N/A	PmagL16	212.91	0.41	18.748	10	Liebrand et al., 2016
B Globoquadrina binaiensis	A-B	PForam	213.13	0.02	19.3	0	Shipboard Scientific Party Leg 208, 2004a
B Sphenolithus belemnos	A	Nanno	214.53	0.4	19.03	0	Shipboard Scientific Party Leg 208, 2004a
C6n (o)	N/A	PmagL16	219.48	1.18	19.722	10	Liebrand et al., 2016
T Paragloborotalia kugleri	B-A	PForam	220.29	2.79	21.12	0	Shipboard Scientific Party Leg 208, 2004a
T Paragloborotalia pseudokugleri	B-A	PForam	220.29	2.79	21.31	0	Shipboard Scientific Party Leg 208, 2004a
T Sphenolithus belemnos	B	Nanno	222.83	5.16	17.95	0	Shipboard Scientific Party Leg 208, 2004a
C6An.1n (y)	N/A	PmagL16	223.53	0.48	20.04	10	Liebrand et al., 2016
C6An.2n (o)	N/A	PmagL16	229.75	0.29	20.709	10	Liebrand et al., 2016
C6AAr.2n (y)	N/A	PmagL16	237.6	0.61	21.659	10	Liebrand et al., 2016
B Globoquadrina dehiscens	B-A	PForam	241.22	3.14	22.44	0	Shipboard Scientific Party Leg 208, 2004a
C6Bn.2n (o)	N/A	PmagL16	243.51	0.35	22.268	10	Liebrand et al., 2016
C6Cn.1n (y)	N/A	PmagL16	246.52	0.58	22.564	10	Liebrand et al., 2016
C6Cn.1n (y)	N/A	PmagL16	246.72	0.22	22.564	10	Liebrand et al., 2016
B Globigerinoides trilobus s.l.	A-B	PForam	248.12	0.68	22.96	0	Shipboard Scientific Party Leg 208, 2004a
C6Cn.1n (o)	N/A	PmagL16	248.3	0.17	22.754	10	Liebrand et al., 2016
C6Cn.2n (y)	N/A	PmagL16	250.19	0.3	22.902	10	Liebrand et al., 2016
C6Cn.2n (o)	N/A	PmagL16	251.18	0.1	23.03	10	Liebrand et al., 2016
C6Cn.3n (y)	N/A	PmagL16	253.17	0.15	23.233	10	Liebrand et al., 2016
C6Cn.3n (o)	N/A	PmagL16	254.01	0.11	23.295	10	Liebrand et al., 2016
B Sphenolithus delphix	B	Nanno	254.45	5.66	23.21	0	Shipboard Scientific Party Leg 208, 2004a
T Sphenolithus delphix	B	Nanno	254.45	5.66	23.11	0	Shipboard Scientific Party Leg 208, 2004a
T Sphenolithus delphix	A	Nanno	256.18	0.42	23.11	10	Shipboard Scientific Party Leg 208, 2004a
B Paragloborotalia kugleri	A	PForam	256.29	0.53	22.96	0	Shipboard Scientific Party Leg 208, 2004a
T Globigerina euapertura	A	PForam	257.58	0.75	23.03	0	Shipboard Scientific Party Leg 208, 2004a
B Sphenolithus delphix	A	Nanno	259	0.1	23.21	10	Shipboard Scientific Party Leg 208, 2004a
T Tenuitella gemma	A	PForam	259.08	0.75	23.5	10	Shipboard Scientific Party Leg 208, 2004a
B Globigerinoides primordius (common)	A	PForam	259.08	0.75	23.5	10	Shipboard Scientific Party Leg 208, 2004a
C7n.1n (y)	N/A	PmagL16	263.43	1.75	23.962	10	Liebrand et al., 2016
T Sphenolithus ciperoensis	B	Nanno	264.64	0.15	24.43	10	Shipboard Scientific Party Leg 208, 2004a
C7n.2n (o)	N/A	PmagL16	266.62	0.06	24.474	10	Liebrand et al., 2016
C7An (y)	N/A	PmagL16	268.58	0.09	24.761	10	Liebrand et al., 2016
T Sphenolithus ciperoensis	A	Nanno	268.8	8.24	24.43	0	Shipboard Scientific Party Leg 208, 2004a
C7An (o)	N/A	PmagL16	269.88	0.51	24.984	10	Liebrand et al., 2016
C8n.2n (y)	N/A	PmagL16	273.38	1.26	25.304	10	Liebrand et al., 2016
T Sphenolithus distentus	B	Nanno	275.97	0.2	26.84	0	Shipboard Scientific Party Leg 208, 2004a
B Paragloborotalia pseudokugleri	A	PForam	279.1	2.06	25.21	0	Shipboard Scientific Party Leg 208, 2004a
B Sphenolithus ciperoensis	A	Nanno	285.41	4.26	29.62	0	Shipboard Scientific Party Leg 208, 2004a
B Sphenolithus ciperoensis	B	Nanno	286.91	0.35	29.62	0	Shipboard Scientific Party Leg 208, 2004a
T Chiloguembelina cubensis (common)	B	PForam	287.13	5.1	28.09	0	Shipboard Scientific Party Leg 208, 2004a
B "Globigerina" angulisuturalis	B-A	PForam	293.46	1.23	29.18	0	Shipboard Scientific Party Leg 208, 2004a
C11n.1n (y)	N/A	PmagL16	306.88	0.06	29.183	10	Liebrand et al., 2016
B Sphenolithus distentus	A	Nanno	310.71	5.28	30	0	Shipboard Scientific Party Leg 208, 2004a
C11n.2n (o)	N/A	PmagL16	315.81	2.07	29.97	10	Liebrand et al., 2016

## Sheet: 1264 pmag Liebrand 2016
These palaeomagnetic reversals from Sites 1265/1266 (Bowles, 2006) were transferred to 1264 by Liebrand et al., 2016. Here, we update the depths to accommodate the changes to the composite depth scale and stratigraphic splice.
Bowles, 2006	Liebrand et al., 2016	Transferred from Site	Liebrand et al., 2016 Depth (rmcd)			This Study Depth (rmcd)			This Study Depth uncertainty (rmcd)			Age Ma (GTS2012)
Chron ID	Chron ID		Top rmcd (L16)	Bottom rmcd (L16)	Mid rmcd (L16)	Top rmcd (D21)	Bottom rmcd (D21)	Mid rcmd (D21)	Top rmcd uncertainty (D21)	Bottom rmcd uncertainty (D21)	Mid rmcd uncertainty (D21)
C5En (o)	C5En (o)	1265	214.05	214.41	214.22	212.09	212.45	212.26	0.16	0.2	0.18	18.524
C6n (y)	C6n (y)	1265	214.46	215.29	214.87	212.5	213.33	212.91	0.41	0.42	0.415	18.748
C6n (o)	C6n (o)	1265	220.45	222.8	221.44	218.49	220.84	219.48	0.99	1.37	1.18	19.722
C6An.1n (y)	C6An (y)	1265	225.06	226.02	225.49	223.1	224.06	223.53	0.43	0.53	0.48	20.04
C6An.2n (o)	C6An (o)	1265	231.4	231.98	231.71	229.44	230.02	229.75	0.31	0.27	0.29	20.709
C6AAr.2n (y)	C6Bn (y)	1265	238.91	240.14	239.56	236.95	238.18	237.6	0.65	0.57	0.61	21.659
C6Bn.2n (o)	C6Bn (o)	1265	245.14	245.85	245.47	243.18	243.89	243.51	0.33	0.38	0.355	22.268
C6Cn.1n (y)	C6Cn (y)	1266	248.03	249.19	248.48	246.07	247.23	246.52	0.46	0.71	0.585	22.564
C6Cn.1n (y)	C6Cn.1n (y)	1265	248.52	248.95	248.68	246.56	246.99	246.72	0.17	0.27	0.22	22.564
C6Cn.1n (o)	C6Cn.1n (o)	1265	250.07	250.41	250.26	248.11	248.45	248.3	0.19	0.15	0.17	22.754
C6Cn.2n (y)	C6Cn.2n (y)	1265	251.88	252.48	252.15	249.92	250.52	250.19	0.27	0.33	0.3	22.902
C6Cn.2n (o)	C6Cn.2n (o)	1265	253.04	253.25	253.14	251.08	251.29	251.18	0.1	0.1	0.1	23.03
C6Cn.3n (y)	C6Cn.3n (y)	1265	254.99	255.29	255.13	253.03	253.33	253.17	0.15	0.15	0.15	23.233
C6Cn.3n (o)	C6Cn.3n (o)	1265	255.85	256.07	255.97	253.89	254.11	254.01	0.11	0.1	0.105	23.295
C7n.1n (y)	C7n (y)	1265	263.58	267.07	265.39	261.62	265.11	263.43	1.81	1.69	1.75	23.962
C7n.2n (o)	C7n (o)	1266	268.52	268.64	268.58	266.56	266.68	266.62	0.06	0.06	0.06	24.474
C7An (y)	C7An (y)	1266	270.45	270.63	270.54	268.49	268.67	268.58	0.09	0.09	0.09	24.761
C7An (o)	C7An (o)	1266	271.42	272.42	271.84	269.46	270.46	269.88	0.42	0.59	0.505	24.984
C8n.2n (y)	C8n (y)	1266	274.15	276.68	275.34	272.19	274.72	273.38	1.19	1.33	1.26	25.304
C11n.1n (y)	C10n (y)	1266	308.78	308.9	308.84	306.82	306.94	306.88	0.06	0.06	0.06	29.183
C11n.2n (o)	C10n (o)	1266	315.55	319.69	317.77	313.59	317.73	315.81	2.22	1.92	2.07	29.97

## Sheet: Nannofossil datums - 1264A
The top and bottom sample intervals of the shipboard nannofossil datums were updated to factor in the composite depth scale revisions in this study.
Hole 1264A Nannofossil datums (Shipboard Scientific Party Leg 208, 2004a)	Age Ma (GTS2012)	Age Myr uncertainty (GTS2012)	Top of sample interval (this study)				Bottom of sample interval (this study)				Middle of sample interval (this study)
			Top ODP ID	Top mbsf	Top rmcd (D21)	Top armcd (D21)	Bottom ODP ID	Bottom mbsf	Bottom rmcd (D21)	Bottom armcd (D21)	Mid mbsf	Mid rmcd (D21)	Mid armcd (D21)	Mid armcd uncertainty (D21)
T Large Gephyrocapsa spp.	1.24	0	208-1264A-1H-3, 20	3.2	6.16	6.16	208-1264A-1H-3, 70	3.7	6.66	6.66	3.45	6.41	6.41	0.25
B Large Gephyrocapsa spp.	1.62	0	208-1264A-1H-4, 70	5.2	8.16	8.16	208-1264A-1H-4, 120	5.7	8.66	8.66	5.45	8.41	8.41	0.25
T Calcidiscus macintyrei	1.6	0	208-1264A-1H-5, 20	6.2	9.16	9.16	208-1264A-1H-5, 70	6.7	9.66	9.66	6.45	9.41	9.41	0.25
B Medium Gephyrocapsa spp.	1.73	0	208-1264A-1H-5, 70	6.7	9.66	9.66	208-1264A-1H-5, 120	7.2	10.16	10.16	6.95	9.91	9.91	0.25
T Discoaster brouweri and D. triradiatus	1.95	0.01	208-1264A-1H-6, 70	8.2	11.16	11.16	208-1264A-1H-7, 20	8.7	11.66	11.666	8.45	11.41	11.413	0.253
T Discoaster pentaradiatus	2.39	0	208-1264A-2H-2, 40	11.2	15.53	15.3093	208-1264A-2H-2, 110	11.9	16.23	16.04	11.55	15.88	15.6747	0.36533
T Discoaster surculus	2.49	0	208-1264A-2H-2, 110	11.9	16.23	16.04	208-1264A-2H-3, 40	12.7	17.03	16.9955	12.3	16.63	16.5177	0.477728
T Discoaster tamalis	2.8	0	208-1264A-2H-3, 110	13.4	17.73	17.73	208-1264A-2H-4, 40	14.2	18.53	18.53	13.8	18.13	18.13	0.400001
T Sphenolithus spp.	3.54	0	208-1264A-3H-3, 120	23	28.89	28.89	208-1264A-3H-4, 40	23.7	29.59	29.59	23.35	29.24	29.24	0.35
T Reticulofenestra pseudoumbilicus	3.7	0	208-1264A-3H-4, 120	24.5	30.39	30.39	208-1264A-3H-5, 40	25.2	31.09	31.09	24.85	30.74	30.74	0.35
T Amaurolithus spp. (Amaurolithus primus NOT tricorniculatus)	4.5	0	208-1264A-3H-9, 19	28.29	34.18	33.8646	208-1264A-4H-1, 40	28.7	35.91	35.91	28.495	35.045	34.8873	1.02269
B Ceratolithus acutus	5.35	0	208-1264A-7H-6, 80	65.1	76.15	76.3012	208-1264A-7H-6, 130	65.6	76.65	76.8962	65.35	76.4	76.5987	0.29752
T Nicklithus amplificus	5.94	0	208-1264A-7H-6, 130	65.6	76.65	76.8962	208-1264A-7H-7, 20	66	77.05	77.2119	65.8	76.85	77.054	0.157841
B Nicklithus amplificus	6.79	0	208-1264A-8H-3, 40	69.7	82.57	82.57	208-1264A-8H-3, 120	70.5	83.37	83.37	70.1	82.97	82.97	0.400002
B Amaurolithus primus	7.42	0	208-1264A-10H-9, 6	94.33	108.77	108.758	208-1264A-11H-1, 40	95.2	109.9	109.923	94.765	109.335	109.341	0.58239
B Paracme Reticulofenestra pseudoumbilicus	8.79	0	208-1264A-11H-9, 12	104.75	119.45	119.45	208-1264A-12H-1, 40	104.7	119.9	119.976	104.725	119.675	119.713	0.26289
T Discoaster neohamatus dominance	9.53	0	208-1264A-13H-7, 55	122.85	139.64	139.724	208-1264A-13H-9, 16	123.18	139.97	140.071	123.015	139.805	139.898	0.17334
T Catinaster calyculus	9.67	0	208-1264A-14H-2, 40	125.2	142.09	142.226	208-1264A-14H-2, 120	126	142.89	142.995	125.6	142.49	142.611	0.384605
B Discoaster neohamatus	9.76	0	208-1264A-14H-3, 120	127.5	144.39	144.39	208-1264A-14H-5, 40	129.7	146.59	146.59	128.6	145.49	145.49	1.1
B Discoaster bellus gr. (= B D. hamatus)	10.4	0	208-1264A-14H-5, 40	129.7	146.59	146.59	208-1264A-14H-5, 120	130.5	147.39	147.39	130.1	146.99	146.99	0.400002
B Catinaster coalitus	10.89	0	208-1264A-15H-7, 20	141.5	159.38	159.372	208-1264A-15H-7, 60	141.9	159.78	159.764	141.7	159.58	159.568	0.195999
T Coccolithus miopelagicus	10.97	0	208-1264A-16H-5, 120	149.5	167.38	167.38	208-1264A-16H-6, 40	150.2	168.08	168.08	149.85	167.73	167.73	0.349998
TC Discoaster kugleri	11.58	0	208-1264A-16H-9, 23	152.13	170.01	170.2	208-1264A-17H-9, 0	161.15	180.58	180.561	156.64	175.295	175.381	5.18024
BC Discoaster kugleri	11.9	0	208-1264A-16H-9, 23	152.13	170.01	170.2	208-1264A-17H-9, 0	161.15	180.58	180.561	156.64	175.295	175.381	5.18024
B Triquetrorhabdulus rugosus	13.27	0	208-1264A-18H-1, 120	162.5	182.46	182.176	208-1264A-18H-2, 40	163.2	183.16	183.065	162.85	182.81	182.621	0.444618
T Sphenolithus heteromorphus	13.53	0	208-1264A-18H-3, 40	164.7	184.66	184.66	208-1264A-18H-3, 120	165.5	185.46	185.46	165.1	185.06	185.06	0.400002
B Discoaster signus gr.	15.85	0	208-1264A-19H-3, 40	174.2	196.15	196.15	208-1264A-19H-3, 120	175	196.95	196.95	174.6	196.55	196.55	0.400002
T Acme Discoaster deflandrei	15.8	0	208-1264A-19H-3, 40	174.2	196.15	196.15	208-1264A-19H-3, 120	175	196.95	196.95	174.6	196.55	196.55	0.400002
B Sphenolithus heteromorphus	17.71	0	208-1264A-20H-4, 40	185.2	208.13	208.13	208-1264A-20H-4, 120	186	208.93	208.93	185.6	208.53	208.53	0.399994
T Sphenolithus belemnos	17.95	0	208-1264A-20H-4, 40	185.2	208.13	208.13	208-1264A-20H-4, 120	186	208.93	208.93	185.6	208.53	208.53	0.399994
B Sphenolithus belemnos	19.03	0	208-1264A-21H-1, 40	190.2	214.13	214.13	208-1264A-21H-1, 120	191	214.93	214.93	190.6	214.53	214.53	0.399994
T Sphenolithus delphix	23.11	0	208-1264A-24H-9, 20	228.25	255.56	255.75	208-1264A-25H-1, 10	227.9	256.6	256.6	228.075	256.08	256.175	0.424866
B Sphenolithus delphix	23.21	0	208-1264A-25H-2, 90	230.2	258.9	258.9	208-1264A-25H-2, 110	230.4	259.1	259.1	230.3	259	259	0.100006
T Sphenolithus ciperoensis	24.43	0	208-1264A-25H-9, 24	231.86	260.56	260.56	208-1264A-26H-9, 14	246.21	276.95	277.039	239.035	268.755	268.8	8.23973
B Sphenolithus ciperoensis	29.62	0	208-1264A-27H-9, 30	249.61	281.15	281.15	208-1264A-28H-1, 40	256.7	289.66	289.572	253.155	285.405	285.361	4.21114
B Sphenolithus distentus	30	0	208-1264A-29H-9, 8	271.47	305.42	305.42	208-1264A-30H-9, 11	280.86	315.99	315.99	276.165	310.705	310.705	5.28499

## Sheet: Nannofossil datums - 1264B
The top and bottom sample intervals of the shipboard nannofossil datums were updated to factor in the composite depth scale revisions in this study.
Hole 1264B Nannofossil datums (Shipboard Scientific Party Leg 208, 2004a)	Age Ma (GTS2012)	Age Myr uncertainty (GTS2012)	Top of sample interval (this study)				Bottom of sample interval (this study)				Middle of sample interval (this study)
			Top ODP ID	Top mbsf	Top rmcd (D21)	Top armcd (D21)	Bottom ODP ID	Bottom mbsf	Bottom rmcd (D21)	Bottom armcd (D21)	Mid mbsf	Mid rmcd (D21)	Mid armcd (D21)	Mid armcd uncertainty (D21)
B Large Gephyrocapsa spp.	1.62	0	208-1264B-1H-9, 7	7.33	7.33	7.35789	208-1264B-2H-9, 0	17.08	18.19	18.16	12.205	12.76	12.7589	5.40105
T Calcidiscus macintyrei	1.6	0	208-1264B-1H-9, 7	7.33	7.33	7.35789	208-1264B-2H-9, 0	17.08	18.19	18.16	12.205	12.76	12.7589	5.40105
B Medium Gephyrocapsa spp.	1.73	0	208-1264B-1H-9, 7	7.33	7.33	7.35789	208-1264B-2H-9, 0	17.08	18.19	18.16	12.205	12.76	12.7589	5.40105
T Discoaster brouweri and D. triradiatus	1.95	0.01	208-1264B-1H-9, 7	7.33	7.33	7.35789	208-1264B-2H-9, 0	17.08	18.19	18.16	12.205	12.76	12.7589	5.40105
T Discoaster pentaradiatus	2.39	0	208-1264B-1H-9, 7	7.33	7.33	7.35789	208-1264B-2H-9, 0	17.08	18.19	18.16	12.205	12.76	12.7589	5.40105
T Discoaster surculus	2.49	0	208-1264B-1H-9, 7	7.33	7.33	7.35789	208-1264B-2H-9, 0	17.08	18.19	18.16	12.205	12.76	12.7589	5.40105
T Discoaster tamalis	2.8	0	208-1264B-2H-9, 0	17.08	18.19	18.16	208-1264B-3H-9, 9	26.67	29.48	29.2454	21.875	23.835	23.7027	5.54268
T Sphenolithus spp.	3.54	0	208-1264B-3H-9, 9	26.67	29.48	29.2454	208-1264B-4H-9, 11	36.06	39.66	39.6784	31.365	34.57	34.4619	5.21651
T Reticulofenestra pseudoumbilicus	3.7	0	208-1264B-3H-9, 9	26.67	29.48	29.2454	208-1264B-4H-9, 11	36.06	39.66	39.6784	31.365	34.57	34.4619	5.21651
T Amaurolithus spp. (Amaurolithus primus NOT tricorniculatus)	4.5	0	208-1264B-4H-9, 11	36.06	39.66	39.6784	208-1264B-5H-9, 0	45.44	49.61	49.8749	40.75	44.635	44.7766	5.09823
B Amaurolithus primus	7.42	0	208-1264B-10H-9, 17	93.23	103.11	102.95	208-1264B-11H-9, 10	102.8	113.24	113.399	98.015	108.175	108.175	5.22416
T Discoaster neohamatus dominance	9.53	0	208-1264B-13H-9, 10	121.11	133.83	133.756	208-1264B-14H-9, 10	131.28	145.46	145.465	126.195	139.645	139.61	5.85427
B Discoaster bellus gr. (= B D. hamatus)	10.4	0	208-1264B-14H-9, 10	131.28	145.46	145.465	208-1264B-15H-9, 0	140.14	155.32	154.948	135.71	150.39	150.207	4.74187
B Catinaster coalitus	10.89	0	208-1264B-15H-9, 0	140.14	155.32	154.948	208-1264B-16H-9, 7	149.82	166.2	166.109	144.98	160.76	160.529	5.58028
T Coccolithus miopelagicus	10.97	0	208-1264B-15H-9, 0	140.14	155.32	154.948	208-1264B-16H-9, 7	149.82	166.2	166.109	144.98	160.76	160.529	5.58028
B Triquetrorhabdulus rugosus	13.27	0	208-1264B-17H-9, 0	159.37	176	175.555	208-1264B-18H-9, 13	169.13	186.8	186.504	164.25	181.4	181.029	5.47446
T Sphenolithus heteromorphus	13.53	0	208-1264B-17H-9, 0	159.37	176	175.555	208-1264B-18H-9, 13	169.13	186.8	186.504	164.25	181.4	181.029	5.47446
B Sphenolithus heteromorphus	17.71	0	208-1264B-20H-9, 17	187.56	207.01	206.871	208-1264B-21H-9, 13	197.61	217.67	217.492	192.585	212.34	212.181	5.31091
T Sphenolithus belemnos	17.95	0	208-1264B-21H-9, 13	197.61	217.67	217.492	208-1264B-22H-9, 17	207.18	227.99	227.773	202.395	222.83	222.633	5.14023
T Sphenolithus delphix	23.11	0	208-1264B-24H-9, 10	226.28	248.79	248.79	208-1264B-25H-9, 8	235.59	260.11	260.052	230.935	254.45	254.421	5.63103
B Sphenolithus delphix	23.21	0	208-1264B-24H-9, 10	226.28	248.79	248.79	208-1264B-25H-9, 8	235.59	260.11	260.052	230.935	254.45	254.421	5.63103
T Sphenolithus ciperoensis	24.43	0	208-1264B-26H-3, 10	238.4	264.49	264.49	208-1264B-26H-3, 40	238.7	264.79	264.79	238.55	264.64	264.64	0.150009
T Sphenolithus distentus	26.84	0	208-1264B-27H-3, 60	248.4	275.77	275.77	208-1264B-27H-3, 100	248.8	276.17	276.17	248.6	275.97	275.97	0.200012
B Sphenolithus ciperoensis	29.62	0	208-1264B-28H-3, 30	257.6	286.56	286.56	208-1264B-28H-3, 100	258.3	287.26	287.26	257.95	286.91	286.91	0.350006

## Sheet: Nannofossil datums - 1264C
The top and bottom sample intervals of the shipboard nannofossil datums were updated to factor in the composite depth scale revisions in this study.
Hole 1264C Nannofossil datums (Shipboard Scientific Party Leg 208, 2004a)	Age Ma (GTS2012)	Age Myr uncertainty (GTS2012)	Top of sample interval (this study)				Bottom of sample interval (this study)				Middle of sample interval (this study)
			Top ODP ID	Top mbsf	Top rmcd (D21)	Top armcd (D21)	Bottom ODP ID	Bottom mbsf	Bottom rmcd (D21)	Bottom armcd (D21)	Mid mbsf	Mid rmcd (D21)	Mid armcd (D21)	Mid armcd uncertainty (D21)
B Emiliania huxleyi	0.29	0	208-1264C-1H-1, 0	0	0.1	-0.00857142	208-1264C-1H-2, 1	1.46	1.56	1.51893	0.73	0.83	0.755179	0.76375
T Pseudoemiliania lacunosa	0.44	0	208-1264C-1H-2, 1	1.46	1.56	1.51893	208-1264C-1H-9, 13	2.95	3.05	3.07929	2.205	2.305	2.29911	0.780179

## Sheet: Planktic foram datums 1264
The top and bottom sample intervals of the shipboard planktic foraminiferal datums were updated to factor in the composite depth scale revisions in this study.
Site 1264 Planktic foraminiferal datums (Shipboard Scientific Party Leg 208, 2004a)	Age Ma (GTS2012)	Top of sample interval (this study)				Bottom of sample interval (this study)				Middle of sample interval (this study)
		Top ODP ID	Top mbsf	Top rmcd (D21)	Top armcd (D21)	Bottom ODP ID	Bottom mbsf	Bottom rmcd (D21)	Bottom armcd (D21)	Mid mbsf	Mid rmcd (D21)	Mid armcd (D21)	Mid armcd uncertainty (D21)
T Globorotalia tosaensis	0.61	208-1264C-1H-1, 0.5	0.005	0.105	-0.00214285	208-1264C-1H-2, 1	1.46	1.56	1.51893	0.7325	0.8325	0.758393	0.760536
T Globoturborotalita obliquus	1.3	208-1264C-1H-1, 0.5	0.005	0.105	-0.00214285	208-1264C-1H-2, 1	1.46	1.56	1.51893	0.7325	0.8325	0.758393	0.760536
T Globoturborotalita apertura	1.64	208-1264B-1H-9, 8	7.34	7.34	7.36737	208-1264A-1H-9, 24	9.31	12.27	12.3126	8.325	9.805	9.83998	2.47262
T Globigerinoides extremus	1.98	208-1264B-1H-9, 8	7.34	7.34	7.36737	208-1264A-1H-9, 24	9.31	12.27	12.3126	8.325	9.805	9.83998	2.47262
B Globorotalia truncatulinoides	1.93	208-1264B-2H-9, 1	17.09	18.2	18.1697	208-1264A-2H-9, 16	19.1	23.43	23.2617	18.095	20.815	20.7157	2.54599
T Globoturborotalita woodi	2.3	208-1264B-2H-9, 1	17.09	18.2	18.1697	208-1264A-2H-9, 16	19.1	23.43	23.2617	18.095	20.815	20.7157	2.54599
T Menardella miocenica	2.39	208-1264B-2H-9, 1	17.09	18.2	18.1697	208-1264A-2H-9, 16	19.1	23.43	23.2617	18.095	20.815	20.7157	2.54599
T Dentoglobigerina altispira	3.13	208-1264A-2H-9, 16	19.1	23.43	23.2617	208-1264B-3H-9, 10	26.68	29.49	29.2543	22.89	26.46	26.258	2.99631
T Sphaeroidinellopsis seminulina	3.16	208-1264A-2H-9, 16	19.1	23.43	23.2617	208-1264B-3H-9, 10	26.68	29.49	29.2543	22.89	26.46	26.258	2.99631
B Globorotalia tosaensis	3.35	208-1264A-2H-9, 16	19.1	23.43	23.2617	208-1264B-3H-9, 10	26.68	29.49	29.2543	22.89	26.46	26.258	2.99631
B Globorotalia miocenica	3.77	208-1264A-2H-9, 16	19.1	23.43	23.2617	208-1264B-3H-9, 10	26.68	29.49	29.2543	22.89	26.46	26.258	2.99631
T Globorotalia margariae	3.85	208-1264B-4H-9, 12	36.07	39.67	39.6865	208-1264A-4H-9, 24	38.04	45.25	45.1123	37.055	42.46	42.3994	2.71293
T Globorotalia plesiotumida	3.77	208-1264A-4H-9, 24	38.04	45.25	45.1123	208-1264B-5H-9, 1	45.45	49.62	49.8874	41.745	47.435	47.4999	2.38756
T Globorotalia cibaoensis	4.61	208-1264A-4H-9, 24	38.04	45.25	45.1123	208-1264B-5H-9, 1	45.45	49.62	49.8874	41.745	47.435	47.4999	2.38756
B Globorotalia crassaformis s.l.	4.31	208-1264B-5H-9, 1	45.45	49.62	49.8874	208-1264A-5H-9, 14	47.56	56.24	56.0319	46.505	52.93	52.9596	3.07221
T Globoturborotalita nepenthes	4.37	208-1264B-5H-9, 1	45.45	49.62	49.8874	208-1264A-5H-9, 14	47.56	56.24	56.0319	46.505	52.93	52.9596	3.07221
B Sphaeroidinella dehiscens s.l.	5.53	208-1264A-6H-5, 33	53.13	63.15	63.15	208-1264A-6H-7, 33	55.31	65.33	65.5374	54.22	64.24	64.3437	1.19369
B Globigerinoides conglobatus	6.2	208-1264A-7H-7, 33	66.13	77.18	77.3117	208-1264A-7H-9, 22	66.81	77.86	77.8341	66.47	77.52	77.5729	0.261158
B Globorotalia tumida	5.72	208-1264A-7H-5, 33	63.12	74.17	74.17	208-1264A-7H-7, 33	66.13	77.18	77.3117	64.625	75.675	75.7409	1.57087
B Globoconella conomiozea	7.89	208-1264A-7H-9, 22	66.81	77.86	77.8341	208-1264B-8H-9, 18	73.9	81.66	81.6833	70.355	79.76	79.7587	1.9246
B Globorotalia cibaoensis	9.44	208-1264B-11H-9, 11	102.81	113.25	113.414	208-1264A-11H-9, 13	104.76	119.46	119.46	103.785	116.355	116.437	3.02295
B Globorotalia plesiotumida	8.58	208-1264A-11H-9, 13	104.76	119.46	119.46	208-1264B-12H-9, 12	111.66	123.56	123.023	108.21	121.51	121.242	1.78163
B Globigerinoides extremus	8.93	208-1264A-12H-9, 8	114.29	129.49	129.257	208-1264B-13H-9, 11	121.12	133.84	133.766	117.705	131.665	131.511	2.25414
B Globorotalia juanai	9.69	208-1264A-13H-9, 17	123.19	139.98	140.082	208-1264B-14H-9, 11	131.29	145.47	145.481	127.24	142.725	142.781	2.69978
T Paragloborotalia mayeri (subtropical)	10.46	208-1264A-13H-9, 17	123.19	139.98	140.082	208-1264B-14H-9, 11	131.29	145.47	145.481	127.24	142.725	142.781	2.69978
T Paragloborotalia mayeri	10.46	208-1264A-13H-9, 17	123.19	139.98	140.082	208-1264B-14H-9, 11	131.29	145.47	145.481	127.24	142.725	142.781	2.69978
B Globigerina apertura	11.18	208-1264B-15H-9, 1	140.15	155.33	154.956	208-1264A-15H-9, 15	142.13	160.01	159.989	141.14	157.67	157.473	2.51625
B Globigerina decoraperta	11.49	208-1264B-17H-9, 1	159.38	176.01	175.563	208-1264A-17H-9, 1	161.16	180.59	180.571	160.27	178.3	178.067	2.50386
B Globoturborotalita nepenthes	11.63	208-1264B-17H-9, 1	159.38	176.01	175.563	208-1264A-17H-9, 1	161.16	180.59	180.571	160.27	178.3	178.067	2.50386
T Hirsutella praescitula	13.73	208-1264A-17H-9, 1	161.16	180.59	180.571	208-1264B-18H-9, 14	169.14	186.81	186.513	165.15	183.7	183.542	2.97105
T Menardella archeomenardii	13.87	208-1264A-17H-9, 1	161.16	180.59	180.571	208-1264B-18H-9, 14	169.14	186.81	186.513	165.15	183.7	183.542	2.97105
T Fohsella peripheroronda	13.8	208-1264A-17H-9, 1	161.16	180.59	180.571	208-1264B-18H-9, 14	169.14	186.81	186.513	165.15	183.7	183.542	2.97105
B Menardella praemenardii	14.38	208-1264A-17H-9, 1	161.16	180.59	180.571	208-1264B-18H-9, 14	169.14	186.81	186.513	165.15	183.7	183.542	2.97105
B Fohsella peripheroacuta	14.24	208-1264B-18H-9, 14	169.14	186.81	186.513	208-1264A-18H-9, 1	170.94	190.9	190.834	170.04	188.855	188.673	2.16027
T Praeorbulina circularis	14.89	208-1264A-18H-9, 1	170.94	190.9	190.834	208-1264A-19H-1, 33	171.13	193.08	192.411	171.035	191.99	191.622	0.788605
T Praeorbulina sicana	14.53	208-1264A-18H-9, 1	170.94	190.9	190.834	208-1264A-19H-1, 33	171.13	193.08	192.411	171.035	191.99	191.622	0.788605
B Orbulina suturalis	15.1	208-1264A-19H-1, 33	171.13	193.08	192.411	208-1264A-19H-2, 33	172.63	194.58	194.177	171.88	193.83	193.294	0.882881
B Orbulina spp.		208-1264A-19H-1, 33	171.13	193.08	192.411	208-1264A-19H-2, 33	172.63	194.58	194.177	171.88	193.83	193.294	0.882881
B Praeorbulina circularis	15.96	208-1264A-19H-2, 33	172.63	194.58	194.177	208-1264A-19H-3, 33	174.13	196.08	196.061	173.38	195.33	195.119	0.942245
B Menardella archeomenardii	16.26	208-1264A-19H-5, 33	177.13	199.08	199.08	208-1264B-20H-2, 79	180.59	200.04	200.04	178.86	199.56	199.56	0.479996
B Praeorbulina glomerosa	16.27	208-1264A-19H-4, 33	175.63	197.58	197.58	208-1264B-20H-1, 79	179.09	198.54	198.651	177.36	198.06	198.116	0.535591
B Praeorbulina sicana	16.38	208-1264B-20H-2, 79	180.59	200.04	200.04	208-1264A-19H-6, 33	178.63	200.58	200.58	179.61	200.31	200.31	0.270004
T Catapsydrax dissimilis	17.54	208-1264B-20H-3, 79	182.09	201.54	201.54	208-1264A-19H-9, 12	179.77	201.72	201.72	180.93	201.63	201.63	0.090004
T Globoquadrina binaiensis	19.09	208-1264B-21H-3, 79	191.59	211.65	211.646	208-1264A-20H-9, 9	190.18	213.11	213.11	190.885	212.38	212.378	0.731956
B Globoquadrina binaiensis	19.3	208-1264A-20H-9, 9	190.18	213.11	213.11	208-1264B-21H-4, 79	193.09	213.15	213.15	191.635	213.13	213.13	0.0199966
T Paragloborotalia kugleri	21.12	208-1264B-21H-9, 14	197.62	217.68	217.5	208-1264A-21H-9, 14	198.83	222.76	223.07	198.225	220.22	220.285	2.785
T Paragloborotalia pseudokugleri	21.31	208-1264B-21H-9, 14	197.62	217.68	217.5	208-1264A-21H-9, 14	198.83	222.76	223.07	198.225	220.22	220.285	2.785
B Globoquadrina dehiscens	22.44	208-1264B-23H-9, 1	216.34	238.15	238.07	208-1264A-23H-9, 11	218.33	244.04	244.36	217.335	241.095	241.215	3.14484
B Globigerinoides trilobus s.l.	22.96	208-1264A-24H-2, 33	220.13	247.44	247.44	208-1264B-24H-9, 11	226.29	248.8	248.8	223.21	248.12	248.12	0.68
B Paragloborotalia kugleri	22.96	208-1264A-24H-9, 21	228.26	255.57	255.76	208-1264A-25H-1, 33	228.13	256.83	256.83	228.195	256.2	256.295	0.534996
T Globigerina euapertura	23.03	208-1264A-25H-1, 33	228.13	256.83	256.83	208-1264A-25H-2, 33	229.63	258.33	258.33	228.88	257.58	257.58	0.75
T Tenuitella gemma	23.5	208-1264A-25H-2, 33	229.63	258.33	258.33	208-1264A-25H-3, 33	231.13	259.83	259.83	230.38	259.08	259.08	0.75
B Globigerinoides primordius (common)	23.5	208-1264A-25H-2, 33	229.63	258.33	258.33	208-1264A-25H-3, 33	231.13	259.83	259.83	230.38	259.08	259.08	0.75
B Paragloborotalia pseudokugleri	25.21	208-1264A-26H-9, 15	246.22	276.96	277.05	208-1264A-27H-9, 31	249.62	281.16	281.16	247.92	279.06	279.105	2.05501
T Chiloguembelina cubensis (common)	28.09	208-1264B-27H-9, 8	254.66	282.03	282.03	208-1264B-28H-9, 13	263.51	292.47	292.238	259.085	287.25	287.134	5.10393
B "Globigerina" angulisuturalis	29.18	208-1264B-28H-9, 13	263.51	292.47	292.238	208-1264A-28H-9, 24	261.73	294.69	294.69	262.62	293.58	293.464	1.22607
