# Supplementary material for: Climate, cryosphere and carbon cycle controls on Southeast Atlantic orbital-scale carbonate deposition since the Oligocene (30–0 Ma)
Source: Copernicus journal article supplement (doi:10.5194/cp-17-2091-2021), 2021-10-15
Supplement: Supplementary file 6 [file SI Table S7 - Site 1264 astrochronology.xlsx]

## Sheet: ODP Site 1264 Astrochronology
Tuning tie #	Leg, Site, Hole, Core, Type, Section, Interval	Depth (mbsf)	D21 Depth 1264 (rmcd)	D21 Delta depth (m)	D21 Age tuned (Ma)	D21 Delta age (kyr)	Sedimentation rates (cm/kyr)	Sedimentation rates (m/Myr)	Tuning strategy	Source	Note
0	208-1264B-1H-1, 2	0.02	0.02		0		1.07692	10.7692	δ18O to LR04(/CR17)	Bell et al., 2014; verified in this study
1	208-1264B-1H-1, 16	0.16	0.16	0.14	0.013	13	0.66129	6.6129	δ18O to LR04(/CR17)	Bell et al., 2014; verified in this study
2	208-1264B-1H-1, 57	0.57	0.57	0.41	0.075	62	0.346154	3.46154	δ18O to LR04(/CR17)	Bell et al., 2014; verified in this study
3	208-1264B-1H-1, 66	0.66	0.66	0.09	0.101	26	0.677419	6.77419	δ18O to LR04(/CR17)	Bell et al., 2014; verified in this study
4	208-1264B-1H-1, 87	0.87	0.87	0.21	0.132	31	0.454545	4.54545	δ18O to LR04(/CR17)	Bell et al., 2014; verified in this study
5	208-1264B-1H-1, 127	1.27	1.27	0.4	0.22	88	0.269231	2.69231	δ18O to LR04(/CR17)	Bell et al., 2014; verified in this study
6	208-1264B-1H-1, 134	1.34	1.34	0.07	0.246	26	0.51282	5.1282	δ18O to LR04(/CR17)	Bell et al., 2014; verified in this study
7	208-1264B-1H-2, 4	1.54	1.54	0.2	0.285	39	0.372549	3.72549	δ18O to LR04(/CR17)	Bell et al., 2014; verified in this study
8	208-1264B-1H-2, 23	1.73	1.73	0.19	0.336	51	0.595505	5.95505	δ18O to LR04(/CR17)	Bell et al., 2014; verified in this study
9	208-1264B-1H-2, 76	2.26	2.26	0.53	0.425	89	1.11538	11.1538	δ18O to LR04(/CR17)	Bell et al., 2014; verified in this study
10	208-1264B-1H-2, 105	2.55	2.55	0.29	0.451	26	0.393443	3.93443	δ18O to LR04(/CR17)	Bell et al., 2014; verified in this study
11	208-1264B-1H-2, 129	2.79	2.79	0.24	0.512	61	0.78125	7.8125	δ18O to LR04(/CR17)	Bell et al., 2014; verified in this study
12	208-1264B-1H-3, 4	3.04	3.04	0.25	0.544	32	0.25	2.5	δ18O to LR04(/CR17)	Bell et al., 2014; verified in this study
13	208-1264B-1H-3, 17	3.17	3.17	0.13	0.596	52	0.448276	4.48276	δ18O to LR04(/CR17)	Bell et al., 2014; verified in this study
14	208-1264B-1H-3, 69	3.69	3.69	0.52	0.712	116	0.435897	4.35897	δ18O to LR04(/CR17)	Bell et al., 2014; verified in this study
15	208-1264A-1H-1, 141	1.41	4.37	0.68	0.868	156	0.541667	5.41667	δ18O to LR04(/CR17)	Bell et al., 2014; verified in this study
16	208-1264A-1H-2, 17	1.67	4.63	0.26	0.916	48	0.508621	5.08621	δ18O to LR04(/CR17)	Bell et al., 2014; verified in this study
17	208-1264A-1H-2, 76	2.26	5.22	0.59	1.032	116	0.621621	6.21621	δ18O to LR04(/CR17)	Bell et al., 2014; verified in this study
18	208-1264A-1H-2, 99	2.49	5.45	0.23	1.069	37.0001	0.709092	7.09092	δ18O to LR04(/CR17)	Bell et al., 2014; verified in this study
19	208-1264A-1H-2, 138	2.88	5.84	0.39	1.124	55	0.529411	5.29411	δ18O to LR04(/CR17)	Bell et al., 2014; verified in this study
20	208-1264A-1H-3, 24	3.24	6.2	0.36	1.192	68	0.677966	6.77966	δ18O to LR04(/CR17)	Bell et al., 2014; verified in this study
21	208-1264A-1H-3, 64	3.64	6.6	0.4	1.251	59	0.588236	5.88236	δ18O to LR04(/CR17)	Bell et al., 2014; verified in this study
22	208-1264A-1H-3, 94	3.94	6.9	0.3	1.302	51	0.797872	7.97872	δ18O to LR04(/CR17)	Bell et al., 2014; verified in this study
23	208-1264A-1H-4, 19	4.69	7.65	0.75	1.396	94	0.500001	5.00001	δ18O to LR04(/CR17)	Bell et al., 2014; verified in this study
24	208-1264A-1H-4, 50	5	7.96	0.31	1.458	61.9999	0.569444	5.69444	δ18O to LR04(/CR17)	Bell et al., 2014; verified in this study
25	208-1264A-1H-4, 91	5.41	8.37	0.41	1.53	72.0001	0.604652	6.04652	δ18O to LR04(/CR17)	Bell et al., 2014; verified in this study
26	208-1264A-1H-4, 117	5.67	8.63	0.26	1.573	43	0.466666	4.66666	δ18O to LR04(/CR17)	Bell et al., 2014; verified in this study
27	208-1264A-1H-4, 131	5.81	8.77	0.14	1.603	30	0.499999	4.99999	δ18O to LR04(/CR17)	Bell et al., 2014; verified in this study
28	208-1264A-1H-5, 2	6.02	8.98	0.21	1.645	42	1.03448	10.3448	δ18O to LR04(/CR17)	Bell et al., 2014; verified in this study
29	208-1264A-1H-5, 62	6.62	9.58	0.6	1.703	57.9999	0.711109	7.11109	δ18O to LR04(/CR17)	Bell et al., 2014; verified in this study
30	208-1264A-1H-5, 94	6.94	9.9	0.32	1.748	45.0001	1.23404	12.3404	δ18O to LR04(/CR17)	Bell et al., 2014; verified in this study
31	208-1264A-1H-6, 2	7.52	10.48	0.58	1.795	47	1.17391	11.7391	δ18O to LR04(/CR17)	Bell et al., 2014; verified in this study
32	208-1264A-1H-6, 29	7.79	10.75	0.27	1.818	23	0.872339	8.72339	δ18O to LR04(/CR17)	Bell et al., 2014; verified in this study
33	208-1264A-1H-6, 70	8.2	11.16	0.41	1.865	47	0.783785	7.83785	δ18O to LR04(/CR17)	Bell et al., 2014; verified in this study
34	208-1264A-1H-6, 99	8.49	11.45	0.29	1.902	37	1.06667	10.6667	δ18O to LR04(/CR17)	Bell et al., 2014; verified in this study
35	208-1264B-2H-3, 52	10.82	11.93	0.48	1.947	45	0.535713	5.35713	δ18O to LR04(/CR17)	Bell et al., 2014; verified in this study
36	208-1264B-2H-3, 82	11.12	12.23	0.3	2.003	56	0.373135	3.73135	δ18O to LR04(/CR17)	Bell et al., 2014; verified in this study
37	208-1264B-2H-3, 107	11.37	12.48	0.25	2.07	66.9999	0.846153	8.46153	δ18O to LR04(/CR17)	Bell et al., 2014; verified in this study
38	208-1264B-2H-4, 67	12.47	13.58	1.1	2.2	130	1.125	11.25	δ18O to LR04(/CR17)	Bell et al., 2014; verified in this study
39	208-1264B-2H-4, 112	12.92	14.03	0.45	2.24	40	0.966102	9.66102	δ18O to LR04(/CR17)	Bell et al., 2014; verified in this study
40	208-1264B-2H-5, 76	14.06	15.17	1.14	2.358	118	0.844156	8.44156	δ18O to LR04(/CR17)	Bell et al., 2014; verified in this study
41	208-1264B-2H-5, 141	14.71	15.82	0.65	2.435	76.9999	0.584905	5.84905	δ18O to LR04(/CR17)	Bell et al., 2014; verified in this study
42	208-1264B-2H-6, 22	15.02	16.13	0.31	2.488	53	0.914288	9.14288	δ18O to LR04(/CR17)	Bell et al., 2014; verified in this study
43	208-1264B-2H-6, 54	15.34	16.45	0.32	2.523	35.0001	0.809523	8.09523	δ18O to LR04(/CR17)	Bell et al., 2014; verified in this study
44	208-1264B-2H-6, 88	15.68	16.79	0.34	2.565	42.0001	0.815791	8.15791	δ18O to LR04(/CR17)	Bell et al., 2014; verified in this study
45	208-1264B-2H-6, 119	15.99	17.1	0.31	2.603	37.9998	0.738093	7.38093	δ18O to LR04(/CR17)	Bell et al., 2014; verified in this study
46	208-1264A-2H-3, 78	13.08	17.41	0.31	2.645	42.0001	1.05714	10.5714	δ18O to LR04(/CR17)	Bell et al., 2014; verified in this study
47	208-1264A-2H-4, 2	13.82	18.15	0.74	2.715	69.9999	1.43333	14.3333	δ18O to LR04(/CR17)	Bell et al., 2014; verified in this study
48	208-1264A-2H-4, 131	15.11	19.44	1.29	2.805	90.0002	0.616542	6.16542	δ18O to LR04(/CR17)	Bell et al., 2014; verified in this study
49	208-1264A-2H-5, 63	15.93	20.26	0.82	2.938	133	0.8	8	δ18O to LR04(/CR17)	Bell et al., 2014; verified in this study
50	208-1264B-3H-1, 97	17.77	20.58	0.32	2.978	39.9999	1.53846	15.3846	δ18O to LR04(/CR17)	Bell et al., 2014; verified in this study
51	208-1264B-3H-2, 27	18.57	21.38	0.8	3.03	52.0001	0.65	6.5	δ18O to LR04(/CR17)	Bell et al., 2014; verified in this study
52	208-1264B-3H-2, 105	19.35	22.16	0.78	3.15	120	1.60001	16.0001	δ18O to LR04(/CR17)	Bell et al., 2014; verified in this study
53	208-1264B-3H-2, 145	19.75	22.56	0.4	3.175	24.9999	1	10	δ18O to LR04(/CR17)	Bell et al., 2014; verified in this study
54	208-1264B-3H-3, 55	20.35	23.16	0.6	3.235	59.9999	0.711109	7.11109	δ18O to LR04(/CR17)	Bell et al., 2014; verified in this study
55	208-1264B-3H-3, 87	20.67	23.48	0.32	3.28	45.0001	1.13636	11.3636	δ18O to LR04(/CR17)	Bell et al., 2014; verified in this study
56	208-1264B-3H-3, 112	20.92	23.73	0.25	3.302	22	1.21085	12.1085	δ18O to LR04(/CR17)	Bell et al., 2014; verified in this study	M2 glacial - strong correlation tie point.
57	208-1264B-3H-4, 62.5	21.925	24.735	1.005	3.385	83	1.44444	14.4444	CaCO3 Maxima(/δ18O Minima) to ET-P Maxima	New tuning tie - this study
58	208-1264B-3H-4, 127.5	22.575	25.385	0.65	3.43	45.0001	1.80097	18.0097	CaCO3 Maxima(/δ18O Minima) to ET-P Maxima	New tuning tie - this study
59	208-1264A-3H-2, 105	21.35	27.24	1.855	3.533	103	1.30208	13.0208	CaCO3 Maxima(/δ18O Minima) to ET-P Maxima	New tuning tie - this study
60	208-1264A-3H-3, 80	22.6	28.49	1.25	3.629	95.9999	1.27907	12.7907	CaCO3 Maxima(/δ18O Minima) to ET-P Maxima	New tuning tie - this study
61	208-1264A-3H-4, 40	23.7	29.59	1.1	3.715	86	1.8421	18.421	CaCO3 Maxima(/δ18O Minima) to ET-P Maxima	New tuning tie - this study
62	208-1264A-3H-5, 100	25.8	31.69	2.1	3.829	114	1.64894	16.4894	CaCO3 Maxima(/δ18O Minima) to ET-P Maxima	New tuning tie - this study
63	208-1264A-3H-6, 27.5	26.575	32.465	0.775	3.876	46.9999	0.86503	8.6503	CaCO3 Maxima(/δ18O Minima) to ET-P Maxima	New tuning tie - this study
64	208-1264B-4H-3, 97.5	30.275	33.875	1.41	4.039	163	1.55462	15.5462	CaCO3 Maxima(/δ18O Minima) to ET-P Maxima	New tuning tie - this study
65	208-1264B-4H-4, 132.5	32.125	35.725	1.85	4.158	119	2.27397	22.7397	CaCO3 Maxima(/δ18O Minima) to ET-P Maxima	New tuning tie - this study
66	208-1264A-4H-2, 37.5	30.175	37.385	1.66	4.231	72.9999	2.57577	25.7577	CaCO3 Maxima(/δ18O Minima) to ET-P Maxima	New tuning tie - this study
67	208-1264A-4H-2, 122.5	31.025	38.235	0.85	4.264	33	2.09998	20.9998	CaCO3 Maxima(/δ18O Minima) to ET-P Maxima	New tuning tie - this study
68	208-1264A-4H-3, 25	31.55	38.76	0.525	4.289	25.0001	1.77083	17.7083	CaCO3 Maxima(/δ18O Minima) to ET-P Maxima	New tuning tie - this study
69	208-1264A-4H-3, 67.5	31.975	39.185	0.425	4.313	24.0002	2.1875	21.875	CaCO3 Maxima(/δ18O Minima) to ET-P Maxima	New tuning tie - this study
70	208-1264A-4H-4, 5	32.85	40.06	0.875	4.353	40	2.73612	27.3612	CaCO3 Maxima(/δ18O Minima) to ET-P Maxima	New tuning tie - this study
71	208-1264B-5H-1, 107.5	36.875	41.045	0.985	4.389	35.9997	1.35417	13.5417	CaCO3 Maxima(/δ18O Minima) to ET-P Maxima	New tuning tie - this study
72	208-1264B-5H-2, 22.5	37.525	41.695	0.65	4.437	47.9999	1.73077	17.3077	CaCO3 Maxima(/δ18O Minima) to ET-P Maxima	New tuning tie - this study
73	208-1264B-5H-2, 90	38.2	42.37	0.675	4.476	39	1.85938	18.5938	CaCO3 Maxima(/δ18O Minima) to ET-P Maxima	New tuning tie - this study
74	208-1264B-5H-2, 149.5	38.795	42.965	0.595	4.508	32.0001	1.91305	19.1305	CaCO3 Maxima(/δ18O Minima) to ET-P Maxima	New tuning tie - this study
75	208-1264B-5H-3, 87.5	39.675	43.845	0.88	4.554	46	1.93181	19.3181	CaCO3 Maxima(/δ18O Minima) to ET-P Maxima	New tuning tie - this study
76	208-1264B-5H-4, 22.5	40.525	44.695	0.85	4.598	44.0001	2.35716	23.5716	CaCO3 Maxima(/δ18O Minima) to ET-P Maxima	New tuning tie - this study
77	208-1264B-5H-4, 105	41.35	45.52	0.825	4.633	34.9999	2.22972	22.2972	CaCO3 Maxima(/δ18O Minima) to ET-P Maxima	New tuning tie - this study
78	208-1264B-5H-5, 37.5	42.175	46.345	0.825	4.67	37.0002	1.32979	13.2979	CaCO3 Maxima(/δ18O Minima) to ET-P Maxima	New tuning tie - this study
79	208-1264B-5H-5, 100	42.8	46.97	0.625	4.717	46.9999	2.92683	29.2683	CaCO3 Maxima(/δ18O Minima) to ET-P Maxima	New tuning tie - this study
80	208-1264B-5H-6, 70	44	48.17	1.2	4.758	40.9999	2.06365	20.6365	CaCO3 Maxima(/δ18O Minima) to ET-P Maxima	New tuning tie - this study
81	208-1264A-5H-2, 87.1	40.171	48.851	0.681	4.791	33	1.06444	10.6444	CaCO3 Maxima(/δ18O Minima) to ET-P Maxima	New tuning tie - this study
82	208-1264A-5H-2, 135	40.65	49.33	0.479	4.836	45.0001	1.55813	15.5813	CaCO3 Maxima(/δ18O Minima) to ET-P Maxima	New tuning tie - this study
83	208-1264A-5H-3, 52	41.32	50	0.67	4.879	43.0002	2.14706	21.4706	CaCO3 Maxima(/δ18O Minima) to ET-P Maxima	New tuning tie - this study
84	208-1264A-5H-3, 125	42.05	50.73	0.73	4.913	33.9999	2.68294	26.8294	CaCO3 Maxima(/δ18O Minima) to ET-P Maxima	New tuning tie - this study
85	208-1264A-5H-4, 85	43.15	51.83	1.1	4.954	40.9999	2.33333	23.3333	CaCO3 Maxima(/δ18O Minima) to ET-P Maxima	New tuning tie - this study
86	208-1264A-5H-5, 40	44.2	52.88	1.05	4.999	45.0001	2.09461	20.9461	CaCO3 Maxima(/δ18O Minima) to ET-P Maxima	New tuning tie - this study
87	208-1264A-5H-5, 117.5	44.975	53.655	0.775	5.036	36.9997	2.28788	22.8788	CaCO3 Maxima(/δ18O Minima) to ET-P Maxima	New tuning tie - this study
88	208-1264B-6H-2, 135	48.15	54.41	0.755	5.069	33	1.98978	19.8978	CaCO3 Maxima(/δ18O Minima) to ET-P Maxima	New tuning tie - this study
89	208-1264B-6H-3, 82.5	49.125	55.385	0.975	5.118	49.0002	2.09677	20.9677	CaCO3 Maxima(/δ18O Minima) to ET-P Maxima	New tuning tie - this study
90	208-1264B-6H-3, 147.5	49.775	56.035	0.65	5.149	31.0002	2.09304	20.9304	CaCO3 Maxima(/δ18O Minima) to ET-P Maxima	New tuning tie - this study
91	208-1264B-6H-4, 87.5	50.675	56.935	0.9	5.192	42.9997	1.72221	17.2221	CaCO3 Maxima(/δ18O Minima) to ET-P Maxima	New tuning tie - this study
92	208-1264B-6H-5, 15	51.45	57.71	0.775	5.237	45.0001	2.4342	24.342	CaCO3 Maxima(/δ18O Minima) to ET-P Maxima	New tuning tie - this study	Tuning is less certain, as correlation is less clear
93	208-1264B-6H-5, 107.5	52.375	58.635	0.925	5.275	38	1.8494	18.494	CaCO3 Maxima(/δ18O Minima) to ET-P Maxima	New tuning tie - this study	Tuning is less certain, as correlation is less clear
94	208-1264A-6H-2, 135	50.15	60.17	1.535	5.358	82.9998	1.11701	11.1701	CaCO3 Maxima(/δ18O Minima) to ET-P Maxima	New tuning tie - this study	Tuning is less certain, as correlation is less clear
95	208-1264A-6H-3, 37.5	50.675	60.695	0.525	5.405	47.0004	2.87501	28.7501	CaCO3 Maxima(/δ18O Minima) to ET-P Maxima	New tuning tie - this study
96	208-1264A-6H-3, 95	51.25	61.27	0.575	5.425	20	1.81819	18.1819	CaCO3 Maxima(/δ18O Minima) to ET-P Maxima	New tuning tie - this study
97	208-1264A-6H-3, 135	51.65	61.67	0.4	5.447	21.9998	2.1	21	CaCO3 Maxima(/δ18O Minima) to ET-P Maxima	New tuning tie - this study
98	208-1264A-6H-4, 90	52.7	62.72	1.05	5.497	50.0002	2.82611	28.2611	CaCO3 Maxima(/δ18O Minima) to ET-P Maxima	New tuning tie - this study
99	208-1264A-6H-5, 55	53.35	63.37	0.65	5.52	22.9998	1.78049	17.8049	CaCO3 Maxima(/δ18O Minima) to ET-P Maxima	New tuning tie - this study
100	208-1264A-6H-6, 40	54.08	64.1	0.73	5.561	40.9999	1.39423	13.9423	CaCO3 Maxima(/δ18O Minima) to ET-P Maxima	New tuning tie - this study
101	208-1264B-7H-3, 92.5	58.725	64.825	0.725	5.613	52	2.94872	29.4872	CaCO3 Maxima(/δ18O Minima) to ET-P Maxima	New tuning tie - this study
102	208-1264B-7H-4, 57.5	59.875	65.975	1.15	5.652	39.0001	2.43591	24.3591	CaCO3 Maxima(/δ18O Minima) to ET-P Maxima	New tuning tie - this study
103	208-1264B-7H-5, 2.5	60.825	66.925	0.95	5.691	39	1.98716	19.8716	CaCO3 Maxima(/δ18O Minima) to ET-P Maxima	New tuning tie - this study
104	208-1264B-7H-5, 80	61.6	67.7	0.775	5.73	39	1.80234	18.0234	CaCO3 Maxima(/δ18O Minima) to ET-P Maxima	New tuning tie - this study
105	208-1264B-7H-6, 7.5	62.375	68.475	0.775	5.773	42.9998	2.5	25	CaCO3 Maxima(/δ18O Minima) to ET-P Maxima	New tuning tie - this study
106	208-1264B-7H-6, 87.5	63.175	69.275	0.8	5.805	32	2.24999	22.4999	CaCO3 Maxima(/δ18O Minima) to ET-P Maxima	New tuning tie - this study
107	208-1264A-7H-2, 37.5	58.675	69.725	0.45	5.825	20	1.84782	18.4782	CaCO3 Maxima(/δ18O Minima) to ET-P Maxima	New tuning tie - this study
108	208-1264A-7H-2, 80	59.1	70.15	0.425	5.848	23.0002	2.20001	22.0001	CaCO3 Maxima(/δ18O Minima) to ET-P Maxima	New tuning tie - this study
109	208-1264A-7H-3, 40	60.2	71.25	1.1	5.898	49.9998	1.95121	19.5121	CaCO3 Maxima(/δ18O Minima) to ET-P Maxima	New tuning tie - this study
110	208-1264A-7H-3, 120	61	72.05	0.8	5.939	41.0003	1.78572	17.8572	CaCO3 Maxima(/δ18O Minima) to ET-P Maxima	New tuning tie - this study
111	208-1264A-7H-4, 45	61.75	72.8	0.75	5.981	41.9998	2.03123	20.3123	CaCO3 Maxima(/δ18O Minima) to ET-P Maxima	New tuning tie - this study
112	208-1264A-7H-4, 110	62.4	73.45	0.65	6.013	32.0001	1.83334	18.3334	CaCO3 Maxima(/δ18O Minima) to ET-P Maxima	New tuning tie - this study
113	208-1264A-7H-5, 31.5	63.115	74.165	0.715	6.052	39	1.69149	16.9149	CaCO3 Maxima(/δ18O Minima) to ET-P Maxima	New tuning tie - this study
114	208-1264B-8H-2, 140	67.2	74.96	0.795	6.099	47	2.43421	24.3421	CaCO3 Maxima(/δ18O Minima) to ET-P Maxima	New tuning tie - this study
115	208-1264B-8H-3, 82.5	68.125	75.885	0.925	6.137	38.0001	2.3913	23.913	CaCO3 Maxima to ET-P Maxima	New tuning tie - this study
116	208-1264B-8H-4, 42.5	69.225	76.985	1.1	6.183	46	2.1591	21.591	CaCO3 Maxima to ET-P Maxima	New tuning tie - this study
117	208-1264B-8H-4, 90	69.7	77.46	0.475	6.205	21.9998	3.14736	31.4736	CaCO3 Maxima to ET-P Maxima	New tuning tie - this study
118	208-1264B-8H-4, 149.8	70.298	78.058	0.598	6.224	19.0001	2.03952	20.3952	CaCO3 Maxima to ET-P Maxima	New tuning tie - this study
119	208-1264B-8H-5, 87.5	71.175	78.935	0.877	6.267	43.0002	2.17745	21.7745	CaCO3 Maxima to ET-P Maxima	New tuning tie - this study
120	208-1264B-8H-6, 5	71.85	79.61	0.675	6.298	30.9997	2.85712	28.5712	CaCO3 Maxima to ET-P Maxima	New tuning tie - this study
121	208-1264B-8H-6, 125	73.05	80.81	1.2	6.34	42.0003	3.15689	31.5689	CaCO3 Maxima to ET-P Maxima	New tuning tie - this study
122	208-1264A-8H-3, 25	69.55	82.42	1.61	6.391	50.9996	1.40244	14.0244	CaCO3 Maxima to ET-P Maxima	New tuning tie - this study	Tuning is less certain, as correlation is less clear
123	208-1264A-8H-3, 82.5	70.125	82.995	0.575	6.432	41.0004	2.15277	21.5277	CaCO3 Maxima to ET-P Maxima	New tuning tie - this study	Tuning is less certain, as correlation is less clear
124	208-1264A-8H-4, 10	70.9	83.77	0.775	6.468	35.9997	2.30769	23.0769	CaCO3 Maxima to ET-P Maxima	New tuning tie - this study	Tuning is less certain, as correlation is less clear
125	208-1264A-8H-4, 100	71.8	84.67	0.9	6.507	39.0001	2.43054	24.3054	CaCO3 Maxima to ET-P Maxima	New tuning tie - this study	Tuning is less certain, as correlation is less clear
126	208-1264A-8H-5, 37.5	72.675	85.545	0.875	6.543	36.0002	2.19513	21.9513	CaCO3 Maxima to ET-P Maxima	New tuning tie - this study
127	208-1264B-9H-3, 97.5	77.775	86.445	0.9	6.584	40.9999	2.13543	21.3543	CaCO3 Maxima to ET-P Maxima	New tuning tie - this study
128	208-1264B-9H-4, 50	78.8	87.47	1.025	6.632	47.9999	2.88887	28.8887	CaCO3 Maxima to ET-P Maxima	New tuning tie - this study
129	208-1264B-9H-5, 30	80.1	88.77	1.3	6.677	45	3.45243	34.5243	CaCO3 Maxima to ET-P Maxima	New tuning tie - this study
130	208-1264B-9H-5, 102.5	80.825	89.495	0.725	6.698	21	3.37498	33.7498	CaCO3 Maxima to ET-P Maxima	New tuning tie - this study
131	208-1264B-9H-6, 20	81.5	90.17	0.675	6.718	19.9999	2.79999	27.9999	CaCO3 Maxima to ET-P Maxima	New tuning tie - this study
132	208-1264B-9H-7, 10	82.9	91.57	1.4	6.768	50.0002	2.4348	24.348	CaCO3 Maxima to ET-P Maxima	New tuning tie - this study
133	208-1264A-9H-2, 95	78.25	92.13	0.56	6.791	22.9998	2.45372	24.5372	CaCO3 Maxima to ET-P Maxima	New tuning tie - this study
134	208-1264A-9H-3, 77.5	79.575	93.455	1.325	6.845	53.9999	3.30644	33.0644	CaCO3 Maxima to ET-P Maxima	New tuning tie - this study
135	208-1264A-9H-4, 30	80.6	94.48	1.025	6.876	31.0001	3.38823	33.8823	CaCO3 Maxima to ET-P Maxima	New tuning tie - this study
136	208-1264B-10H-3, 118	87.48	97.36	2.88	6.961	85.0001	2.60464	26.0464	CaCO3 Maxima to ET-P Maxima	New tuning tie - this study
137	208-1264B-10H-4, 80	88.6	98.48	1.12	7.004	43.0002	3.33332	33.3332	CaCO3 Maxima to ET-P Maxima	New tuning tie - this study
138	208-1264B-10H-5, 60	89.9	99.78	1.3	7.043	39	3.06061	30.6061	CaCO3 Maxima to ET-P Maxima	New tuning tie - this study
139	208-1264B-10H-6, 22	90.91	100.79	1.01	7.076	33	2.55319	25.5319	CaCO3 Maxima to ET-P Maxima	New tuning tie - this study
140	208-1264A-10H-2, 75	87.55	101.99	1.2	7.123	46.9999	2.7353	27.353	CaCO3 Maxima to ET-P Maxima	New tuning tie - this study
141	208-1264A-10H-3, 18	88.48	102.92	0.93	7.157	34	1.97727	19.7727	CaCO3 Maxima to ET-P Maxima	New tuning tie - this study
142	208-1264A-10H-3, 105	89.35	103.79	0.87	7.201	44.0001	2.2143	22.143	CaCO3 Maxima to ET-P Maxima	New tuning tie - this study
143	208-1264A-10H-4, 48	90.28	104.72	0.93	7.243	41.9998	2.44736	24.4736	CaCO3 Maxima to ET-P Maxima	New tuning tie - this study
144	208-1264B-11H-3, 10	95.21	105.65	0.93	7.281	38.0001	2.37178	23.7178	CaCO3 Maxima to ET-P Maxima	New tuning tie - this study
145	208-1264B-11H-3, 102.5	96.135	106.575	0.925	7.32	39.0001	2.31709	23.1709	CaCO3 Maxima to ET-P Maxima	New tuning tie - this study
146	208-1264B-11H-4, 47.5	97.085	107.525	0.95	7.361	40.9999	2.33332	23.3332	CaCO3 Maxima to ET-P Maxima	New tuning tie - this study
147	208-1264B-11H-5, 2.5	98.135	108.575	1.05	7.406	45	1.84214	18.4214	CaCO3 Maxima to ET-P Maxima	New tuning tie - this study
148	208-1264B-11H-5, 72.5	98.835	109.275	0.7	7.444	37.9997	3.5714	35.714	CaCO3 Maxima to ET-P Maxima	New tuning tie - this study
149	208-1264B-11H-6, 47.5	100.085	110.525	1.25	7.479	35.0003	2	20	CaCO3 Maxima to ET-P Maxima	New tuning tie - this study
150	208-1264B-11H-6, 137.5	100.985	111.425	0.9	7.524	45.0001	1.90972	19.0972	CaCO3 Maxima to ET-P Maxima	New tuning tie - this study
151	208-1264B-11H-8, 25	102.36	112.8	1.375	7.596	72	2.15001	21.5001	CaCO3 Maxima to ET-P Maxima	New tuning tie - this study
152	208-1264A-11H-3, 137.5	99.175	113.875	1.075	7.646	49.9997	1.47435	14.7435	CaCO3 Maxima to ET-P Maxima	New tuning tie - this study
153	208-1264A-11H-4, 45	99.75	114.45	0.575	7.685	39	1.89394	18.9394	CaCO3 Maxima to ET-P Maxima	New tuning tie - this study
154	208-1264A-11H-4, 107.5	100.375	115.075	0.625	7.718	33	1.48149	14.8149	CaCO3 Maxima to ET-P Maxima	New tuning tie - this study
155	208-1264A-11H-4, 147.5	100.775	115.475	0.4	7.745	27	1.875	18.75	CaCO3 Maxima to ET-P Maxima	New tuning tie - this study
156	208-1264A-11H-5, 80	101.6	116.3	0.825	7.789	44.0001	3.0303	30.303	CaCO3 Maxima to ET-P Maxima	New tuning tie - this study
157	208-1264A-11H-6, 30	102.6	117.3	1	7.822	33	0.960523	9.60523	CaCO3 Maxima to ET-P Maxima	New tuning tie - this study
158	208-1264B-12H-5, 26	107.59	119.49	2.19	8.05	228	1.41334	14.1334	CaCO3 Minima to E(T) Maxima	New tuning tie - this study
159	208-1264B-12H-5, 132	108.65	120.55	1.06	8.125	74.9998	1.61386	16.1386	CaCO3 Minima to E(T) Maxima	New tuning tie - this study
160	208-1264A-12H-2, 118	106.98	122.18	1.63	8.226	101	1.54955	15.4955	CaCO3 Minima to E(T) Maxima	New tuning tie - this study
161	208-1264A-12H-3, 140	108.7	123.9	1.72	8.337	111	1.27273	12.7273	CaCO3 Minima to E(T) Maxima	New tuning tie - this study
162	208-1264A-12H-4, 130	110.1	125.3	1.4	8.447	110	1.47057	14.7057	CaCO3 Minima to E(T) Maxima	New tuning tie - this study
163	208-1264A-12H-5, 80	111.1	126.3	1	8.515	68	1.29293	12.9293	CaCO3 Minima to E(T) Maxima	New tuning tie - this study
164	208-1264B-13H-3, 6	114.86	127.58	1.28	8.614	99	1.625	16.25	CaCO3 Minima to E(T) Maxima	New tuning tie - this study
165	208-1264B-13H-4, 38	116.68	129.4	1.82	8.726	112	1.94174	19.4174	CaCO3 Minima to E(T) Maxima	New tuning tie - this study
166	208-1264B-13H-5, 88	118.68	131.4	2	8.829	103	1.67	16.7	CaCO3 Minima to E(T) Maxima	New tuning tie - this study
167	208-1264A-13H-2, 64.6	115.946	132.736	1.336	8.909	80	1.76213	17.6213	CaCO3 Minima to E(T) Maxima	New tuning tie - this study
168	208-1264A-13H-3, 82	117.62	134.41	1.674	9.004	95	1.43119	14.3119	CaCO3 Minima to E(T) Maxima	New tuning tie - this study
169	208-1264A-13H-4, 88	119.18	135.97	1.56	9.113	109	0.962927	9.62927	CaCO3 Minima to E(T) Maxima	New tuning tie - this study
170	208-1264A-13H-4, 114	119.44	136.23	0.26	9.14	27	1.47833	14.7833	CaCO3 Minima to E(T) Maxima	New tuning tie - this study
171	208-1264A-13H-4, 148	119.78	136.57	0.34	9.163	23	1.61904	16.1904	CaCO3 Minima to E(T) Maxima	New tuning tie - this study
172	208-1264A-13H-5, 32	120.12	136.91	0.34	9.184	21	1.52991	15.2991	CaCO3 Minima to E(T) Maxima	New tuning tie - this study
173	208-1264B-14H-3, 22	124.52	138.7	1.79	9.301	117	1.60526	16.0526	CaCO3 Minima to E(T) Maxima	New tuning tie - this study	Tuning more constrained by tilt than eccentricity during 2.4 Myr eccentricity minima
174	208-1264B-14H-3, 144	125.74	139.92	1.22	9.377	76	1.40427	14.0427	CaCO3 Minima to E(T) Maxima	New tuning tie - this study	Tuning more constrained by tilt than eccentricity during 2.4 Myr eccentricity minima
175	208-1264B-14H-4, 60	126.4	140.58	0.66	9.424	47	1.34246	13.4246	CaCO3 Minima to E(T) Maxima	New tuning tie - this study	Tuning more constrained by tilt than eccentricity during 2.4 Myr eccentricity minima
176	208-1264B-14H-5, 8	127.38	141.56	0.98	9.497	73	1.18606	11.8606	CaCO3 Minima to E(T) Maxima	New tuning tie - this study	Tuning more constrained by tilt than eccentricity during 2.4 Myr eccentricity minima
177	208-1264B-14H-5, 59	127.89	142.07	0.51	9.54	43	1.52172	15.2172	CaCO3 Minima to E(T) Maxima	New tuning tie - this study	Tuning more constrained by tilt than eccentricity during 2.4 Myr eccentricity minima
178	208-1264B-14H-5, 129	128.59	142.77	0.7	9.586	46	1.01333	10.1333	CaCO3 Minima to E(T) Maxima	New tuning tie - this study	Tuning more constrained by tilt than eccentricity during 2.4 Myr eccentricity minima
179	208-1264B-14H-6, 55	129.35	143.53	0.76	9.661	75.0003	0.91176	9.1176	CaCO3 Minima to E(T) Maxima	New tuning tie - this study	Tuning more constrained by tilt than eccentricity during 2.4 Myr eccentricity minima
180	208-1264A-14H-3, 96	127.26	144.15	0.62	9.729	67.9998	1.72116	17.2116	CaCO3 Minima to E Maxima	New tuning tie - this study
181	208-1264A-14H-4, 125	129.05	145.94	1.79	9.833	104	1.63963	16.3963	CaCO3 Minima to E Maxima	New tuning tie - this study
182	208-1264A-14H-6, 7	130.87	147.76	1.82	9.944	111	1.15095	11.5095	CaCO3 Minima to E Maxima	New tuning tie - this study
183	208-1264B-15H-2, 150	133.8	148.98	1.22	10.05	106	1.66668	16.6668	CaCO3 Minima to E Maxima	New tuning tie - this study
184	208-1264B-15H-3, 140	135.2	150.38	1.4	10.134	84	1.89872	18.9872	CaCO3 Minima to E Maxima	New tuning tie - this study
185	208-1264B-15H-4, 140	136.7	151.88	1.5	10.213	79	1.43877	14.3877	CaCO3 Minima to E Maxima	New tuning tie - this study
186	208-1264A-15H-2, 111	135.41	153.29	1.41	10.311	98	1.46611	14.6611	CaCO3 Minima to E Maxima	New tuning tie - this study
187	208-1264A-15H-3, 134	137.14	155.02	1.73	10.429	118	1.4321	14.321	CaCO3 Minima to E Maxima	New tuning tie - this study
188	208-1264A-15H-5, 66	139.46	157.34	2.32	10.591	162	1.34862	13.4862	CaCO3 Minima to E Maxima	New tuning tie - this study
189	208-1264A-15H-6, 63	140.93	158.81	1.47	10.7	109	1.47271	14.7271	CaCO3 Minima to E Maxima	New tuning tie - this study
190	208-1264B-16H-3, 75	144.05	160.43	1.62	10.81	110	1.01002	10.1002	CaCO3 Minima to E Maxima	New tuning tie - this study
191	208-1264B-16H-4, 26	145.06	161.44	1.01	10.91	100	1.07593	10.7593	CaCO3 Minima to E Maxima	New tuning tie - this study
192	208-1264B-16H-4, 111	145.91	162.29	0.85	10.989	79	0.922345	9.22345	CaCO3 Minima to E Maxima	New tuning tie - this study
193	208-1264B-16H-5, 56	146.86	163.24	0.95	11.092	103	0.694446	6.94446	CaCO3 Minima to E Maxima	New tuning tie - this study
194	208-1264A-16H-3, 81	146.11	163.99	0.75	11.2	108	0.801879	8.01879	CaCO3 Minima to E Maxima	New tuning tie - this study
195	208-1264A-16H-4, 16	146.96	164.84	0.85	11.306	106	1.43861	14.3861	CaCO3 Minima to E Maxima	New tuning tie - this study
196	208-1264A-16H-4, 98	147.78	165.66	0.82	11.363	57	0.929989	9.29989	CaCO3 Minima to E Maxima	New tuning tie - this study
197	208-1264A-16H-5, 41	148.71	166.59	0.93	11.463	100	0.801893	8.01893	CaCO3 Minima to E Maxima	New tuning tie - this study
198	208-1264A-16H-5, 126	149.56	167.44	0.85	11.569	106	0.8	8	CaCO3 Minima to E Maxima	New tuning tie - this study
199	208-1264A-16H-6, 60	150.4	168.28	0.84	11.674	105	0.999993	9.99993	CaCO3 Minima to E Maxima	New tuning tie - this study
200	208-1264B-17H-2, 116	152.46	169.09	0.81	11.755	81	1.19101	11.9101	CaCO3 Minima to E Maxima	New tuning tie - this study
201	208-1264B-17H-3, 72	153.52	170.15	1.06	11.844	89	0.962269	9.62269	CaCO3 Minima to E Maxima	New tuning tie - this study
202	208-1264B-17H-4, 24	154.54	171.17	1.02	11.95	106	0.962973	9.62973	CaCO3 Minima to E Maxima	New tuning tie - this study
203	208-1264B-17H-4, 128	155.58	172.21	1.04	12.058	108	0.851479	8.51479	CaCO3 Minima to E Maxima	New tuning tie - this study
204	208-1264B-17H-5, 64	156.44	173.07	0.86	12.159	101	1.17074	11.7074	CaCO3 Minima to E Maxima	New tuning tie - this study
205	208-1264A-17H-2, 82	154.12	173.55	0.48	12.2	41	0.575473	5.75473	CaCO3 Minima to E Maxima	New tuning tie - this study
206	208-1264A-17H-2, 143	154.73	174.16	0.61	12.306	106	0.964902	9.64902	CaCO3 Minima to E Maxima	New tuning tie - this study
207	208-1264A-17H-3, 103	155.83	175.26	1.1	12.42	114	0.616162	6.16162	CaCO3 Minima to E Maxima	New tuning tie - this study
208	208-1264A-17H-4, 14	156.44	175.87	0.61	12.519	99	1.15626	11.5626	CaCO3 Minima to E Maxima	New tuning tie - this study
209	208-1264A-17H-4, 88	157.18	176.61	0.74	12.583	64	0.948976	9.48976	CaCO3 Minima to E Maxima	New tuning tie - this study
210	208-1264B-18H-1, 57	159.87	177.54	0.93	12.681	98	0.9009	9.009	CaCO3 Minima to E Maxima	New tuning tie - this study
211	208-1264B-18H-2, 7	160.87	178.54	1	12.792	111	0.773592	7.73592	CaCO3 Minima to E Maxima	New tuning tie - this study
212	208-1264B-18H-2, 89	161.69	179.36	0.82	12.898	106	1	10	CaCO3 Minima to E Maxima	New tuning tie - this study
213	208-1264B-18H-3, 27	162.57	180.24	0.88	12.986	88	0.819267	8.19267	CaCO3 Minima to E Maxima	New tuning tie - this study
214	208-1264B-18H-3, 95	163.25	180.92	0.68	13.069	83	0.740745	7.40745	CaCO3 Minima to E Maxima	New tuning tie - this study
215	208-1264B-18H-4, 25	164.05	181.72	0.8	13.177	108	0.836365	8.36365	CaCO3 Minima to E Maxima	New tuning tie - this study
216	208-1264B-18H-4, 117	164.97	182.64	0.92	13.287	110	1.10125	11.0125	CaCO3 Minima to E Maxima	New tuning tie - this study
217	208-1264B-18H-5, 54	165.84	183.51	0.87	13.366	79	0.707873	7.07873	CaCO3 Minima to E Maxima	New tuning tie - this study
218	208-1264B-18H-5, 117	166.47	184.14	0.63	13.455	89	0.629638	6.29638	CaCO3 Minima to E Maxima	New tuning tie - this study
219	208-1264A-18H-3, 56	164.86	184.82	0.68	13.563	108	0.603773	6.03773	CaCO3 Minima to E Maxima	New tuning tie - this study
220	208-1264A-18H-3, 120	165.5	185.46	0.64	13.669	106	0.666661	6.66661	CaCO3 Minima to E Maxima	New tuning tie - this study
221	208-1264A-18H-4, 34	166.14	186.1	0.64	13.765	96	0.822782	8.22782	CaCO3 Minima to E Maxima	New tuning tie - this study
222	208-1264A-18H-4, 99	166.79	186.75	0.65	13.844	79	0.740388	7.40388	CaCO3 Minima to E Maxima	New tuning tie - this study
223	208-1264A-18H-5, 26	167.56	187.52	0.77	13.948	104	0.690265	6.90265	CaCO3 Minima to E Maxima	New tuning tie - this study
224	208-1264A-18H-5, 104	168.34	188.3	0.78	14.061	113	0.458715	4.58715	CaCO3 Minima to E Maxima	New tuning tie - this study
225	208-1264A-18H-6, 4	168.84	188.8	0.5	14.17	109	0.648438	6.48438	CaCO3 Minima to E Maxima	New tuning tie - this study
226	208-1264A-18H-6, 87	169.67	189.63	0.83	14.298	128	0.999995	9.99995	CaCO3 Minima to E Maxima	New tuning tie - this study
227	208-1264B-19H-3, 10	171.9	190.73	1.1	14.408	110	0.773592	7.73592	CaCO3 Minima to E Maxima	New tuning tie - this study
228	208-1264B-19H-3, 92	172.72	191.55	0.82	14.514	106	0.727266	7.27266	CaCO3 Minima to E Maxima	New tuning tie - this study
229	208-1264B-19H-3, 140	173.2	192.03	0.48	14.58	66	0.528744	5.28744	CaCO3 Minima to E Maxima	New tuning tie - this study
230	208-1264B-19H-4, 36	173.66	192.49	0.46	14.667	87	0.545443	5.45443	CaCO3 Minima to E Maxima	New tuning tie - this study
231	208-1264B-19H-4, 96	174.26	193.09	0.6	14.777	110	0.623865	6.23865	CaCO3 Minima to E Maxima	New tuning tie - this study
232	208-1264B-19H-5, 14	174.94	193.77	0.68	14.886	109	0.479994	4.79994	CaCO3 Minima to E Maxima	New tuning tie - this study
233	208-1264B-19H-5, 62	175.42	194.25	0.48	14.986	100	0.50795	5.0795	CaCO3 Minima to E Maxima	New tuning tie - this study
234	208-1264B-19H-5, 94	175.74	194.57	0.32	15.049	63	0.615383	6.15383	CaCO3 Minima to E Maxima	New tuning tie - this study
235	208-1264B-19H-6, 8	176.38	195.21	0.64	15.153	104	0.537026	5.37026	CaCO3 Minima to E Maxima	New tuning tie - this study
236	208-1264B-19H-6, 66	176.96	195.79	0.58	15.261	108	0.41238	4.1238	CaCO3 Minima to E Maxima	New tuning tie - this study
237	208-1264A-19H-3, 44	174.24	196.19	0.4	15.358	97	0.416668	4.16668	CaCO3 Minima to E Maxima	New tuning tie - this study
238	208-1264A-19H-3, 74	174.54	196.49	0.3	15.43	72	0.584901	5.84901	CaCO3 Minima to E Maxima	New tuning tie - this study
239	208-1264A-19H-3, 136	175.16	197.11	0.62	15.536	106	0.540546	5.40546	CaCO3 Minima to E Maxima	New tuning tie - this study
240	208-1264A-19H-4, 46	175.76	197.71	0.6	15.647	111	0.653839	6.53839	CaCO3 Minima to E Maxima	New tuning tie - this study
241	208-1264A-19H-4, 114	176.44	198.39	0.68	15.751	104	0.641986	6.41986	CaCO3 Minima to E Maxima	New tuning tie - this study
242	208-1264A-19H-5, 16	176.96	198.91	0.52	15.832	81	0.595743	5.95743	CaCO3 Minima to E Maxima	New tuning tie - this study
243	208-1264A-19H-5, 72	177.52	199.47	0.56	15.926	94	0.592588	5.92588	CaCO3 Minima to E Maxima	New tuning tie - this study
244	208-1264B-20H-2, 86	180.66	200.11	0.64	16.034	108	0.547177	5.47177	CaCO3 Minima to E Maxima	New tuning tie - this study
245	208-1264B-20H-2, 144	181.24	200.69	0.58	16.14	105.999	0.567743	5.67743	CaCO3 Minima to E Maxima	New tuning tie - this study
246	208-1264B-20H-3, 82	182.12	201.57	0.88	16.295	155.001	0.537026	5.37026	CaCO3 Minima to E Maxima	New tuning tie - this study
247	208-1264B-20H-3, 140	182.7	202.15	0.58	16.403	108	0.411216	4.11216	CaCO3 Minima to E Maxima	New tuning tie - this study
248	208-1264B-20H-4, 34	183.14	202.59	0.44	16.51	107	0.638894	6.38894	CaCO3 Minima to E Maxima	New tuning tie - this study
249	208-1264B-20H-4, 80	183.6	203.05	0.46	16.582	72.001	0.488378	4.88378	CaCO3 Minima to E Maxima	New tuning tie - this study
250	208-1264B-20H-4, 122	184.02	203.47	0.42	16.668	85.998	0.418602	4.18602	CaCO3 Minima to E Maxima	New tuning tie - this study
251	208-1264B-20H-5, 62	184.92	204.37	0.9	16.883	215	0.389943	3.89943	CaCO3 Minima to E Maxima	New tuning tie - this study
252	208-1264A-20H-2, 26	182.06	204.99	0.62	17.042	159.001	0.451609	4.51609	CaCO3 Minima(/δ18O Maxima) to E Maxima	Liebrand et al., 2016; rmcd updated in this study
253	208-1264A-20H-2, 68	182.48	205.41	0.42	17.135	93	0.462964	4.62964	CaCO3 Minima(/δ18O Maxima) to E Maxima	Liebrand et al., 2016; rmcd updated in this study
254	208-1264A-20H-2, 118	182.98	205.91	0.5	17.243	108	0.477057	4.77057	CaCO3 Minima(/δ18O Maxima) to E Maxima	Liebrand et al., 2016; rmcd updated in this study
255	208-1264A-20H-3, 20	183.5	206.43	0.52	17.352	108.999	0.50001	5.0001	CaCO3 Minima(/δ18O Maxima) to E Maxima	Liebrand et al., 2016; rmcd updated in this study
256	208-1264A-20H-3, 48	183.78	206.71	0.28	17.408	56.002	0.475244	4.75244	CaCO3 Minima(/δ18O Maxima) to E Maxima	Liebrand et al., 2016; rmcd updated in this study
257	208-1264A-20H-3, 96	184.26	207.19	0.48	17.509	101	0.522939	5.22939	CaCO3 Minima(/δ18O Maxima) to E Maxima	Liebrand et al., 2016; rmcd updated in this study
258	208-1264A-20H-4, 60	185.4	208.33	1.14	17.727	217.998	0.351634	3.51634	CaCO3 Minima(/δ18O Maxima) to E Maxima	Liebrand et al., 2016; rmcd updated in this study
259	208-1264A-20H-4, 92	185.72	208.65	0.32	17.818	91.002	0.483446	4.83446	CaCO3 Minima(/δ18O Maxima) to E Maxima	Liebrand et al., 2016; rmcd updated in this study
260	208-1264A-20H-5, 88	187.18	210.11	1.46	18.12	302	0.679617	6.79617	CaCO3 Minima(/δ18O Maxima) to E Maxima	Liebrand et al., 2016; rmcd updated in this study
261	208-1264A-20H-6, 8	187.88	210.81	0.7	18.223	102.999	0.354839	3.54839	CaCO3 Minima(/δ18O Maxima) to E Maxima	Liebrand et al., 2016; rmcd updated in this study
262	208-1264A-20H-6, 30	188.1	211.03	0.22	18.285	62	0.578952	5.78952	CaCO3 Minima(/δ18O Maxima) to E Maxima	Liebrand et al., 2016; rmcd updated in this study
263	208-1264B-21H-3, 138	192.18	212.24	1.21	18.494	208.999	0.451609	4.51609	CaCO3 Minima(/δ18O Maxima) to E Maxima	Liebrand et al., 2016; rmcd updated in this study
264	208-1264B-21H-4, 30	192.6	212.66	0.42	18.587	93.001	0.506021	5.06021	CaCO3 Minima(/δ18O Maxima) to E Maxima	Liebrand et al., 2016; rmcd updated in this study
265	208-1264B-21H-4, 72	193.02	213.08	0.42	18.67	83	0.685718	6.85718	CaCO3 Minima(/δ18O Maxima) to E Maxima	Liebrand et al., 2016; rmcd updated in this study
266	208-1264B-21H-4, 144	193.74	213.8	0.72	18.775	105	0.644063	6.44063	CaCO3 Minima(/δ18O Maxima) to E Maxima	Liebrand et al., 2016; rmcd updated in this study
267	208-1264B-21H-5, 70	194.5	214.56	0.76	18.893	118	0.717101	7.17101	CaCO3 Minima(/δ18O Maxima) to E Maxima	Liebrand et al., 2016; rmcd updated in this study
268	208-1264A-21H-2, 42	191.72	215.65	1.09	19.045	152	0.754293	7.54293	CaCO3 Minima(/δ18O Maxima) to E Maxima	Liebrand et al., 2016; rmcd updated in this study
269	208-1264A-21H-3, 24	193.04	216.97	1.32	19.22	174.999	0.709086	7.09086	CaCO3 Minima(/δ18O Maxima) to E Maxima	Liebrand et al., 2016; rmcd updated in this study
270	208-1264A-21H-3, 102	193.82	217.75	0.78	19.33	110.001	0.8642	8.642	CaCO3 Minima(/δ18O Maxima) to E Maxima	Liebrand et al., 2016; rmcd updated in this study
271	208-1264A-21H-4, 22	194.52	218.45	0.7	19.411	80.999	0.835013	8.35013	CaCO3 Minima(/δ18O Maxima) to E Maxima	Liebrand et al., 2016; rmcd updated in this study
272	208-1264B-22H-2, 138	200.18	220.93	2.48	19.708	297.001	0.910906	9.10906	CaCO3 Minima(/δ18O Maxima) to E Maxima	Liebrand et al., 2016; rmcd updated in this study
273	208-1264B-22H-3, 80	201.1	221.85	0.92	19.809	101	0.944428	9.44428	CaCO3 Minima(/δ18O Maxima) to E Maxima	Liebrand et al., 2016; rmcd updated in this study
274	208-1264B-22H-3, 148	201.78	222.53	0.68	19.881	72.001	1.02971	10.2971	CaCO3 Minima(/δ18O Maxima) to E Maxima	Liebrand et al., 2016; rmcd updated in this study
275	208-1264B-22H-4, 102	202.82	223.57	1.04	19.982	100.999	0.864857	8.64857	CaCO3 Minima(/δ18O Maxima) to E Maxima	Liebrand et al., 2016; rmcd updated in this study
276	208-1264B-22H-5, 48	203.78	224.53	0.96	20.093	111	0.857153	8.57153	CaCO3 Minima(/δ18O Maxima) to E Maxima	Liebrand et al., 2016; rmcd updated in this study
277	208-1264B-22H-5, 144	204.74	225.49	0.96	20.205	112	1.04969	10.4969	CaCO3 Minima(/δ18O Maxima) to E Maxima	Liebrand et al., 2016; rmcd updated in this study
278	208-1264A-22H-2, 148	202.28	227.18	1.69	20.366	160.999	0.846849	8.46849	CaCO3 Minima(/δ18O Maxima) to E Maxima	Liebrand et al., 2016; rmcd updated in this study
279	208-1264A-22H-3, 92	203.22	228.12	0.94	20.477	111	0.691592	6.91592	CaCO3 Minima(/δ18O Maxima) to E Maxima	Liebrand et al., 2016; rmcd updated in this study
280	208-1264A-22H-4, 16	203.96	228.86	0.74	20.584	107.001	0.5	5	CaCO3 Minima(/δ18O Maxima) to E Maxima	Liebrand et al., 2016; rmcd updated in this study
281	208-1264A-22H-4, 58	204.38	229.28	0.42	20.668	83.999	0.433735	4.33735	CaCO3 Minima(/δ18O Maxima) to E Maxima	Liebrand et al., 2016; rmcd updated in this study
282	208-1264A-22H-4, 94	204.74	229.64	0.36	20.751	83	0.780949	7.80949	CaCO3 Minima(/δ18O Maxima) to E Maxima	Liebrand et al., 2016; rmcd updated in this study
283	208-1264A-22H-5, 26	205.56	230.46	0.82	20.856	105.002	0.694446	6.94446	CaCO3 Minima(/δ18O Maxima) to E Maxima	Liebrand et al., 2016; rmcd updated in this study
284	208-1264B-23H-2, 126	209.56	231.21	0.75	20.964	108	0.989261	9.89261	CaCO3 Minima(/δ18O Maxima) to E Maxima	Liebrand et al., 2016; rmcd updated in this study
285	208-1264B-23H-3, 68	210.48	232.13	0.92	21.057	92.998	0.599962	5.99962	CaCO3 Minima(/δ18O Maxima) to E Maxima	Liebrand et al., 2016; rmcd updated in this study
286	208-1264B-23H-3, 98	210.78	232.43	0.3	21.107	50.001	0.859823	8.59823	CaCO3 Minima(/δ18O Maxima) to E Maxima	Liebrand et al., 2016; rmcd updated in this study
287	208-1264B-23H-4, 40	211.7	233.35	0.92	21.214	107.001	0.666657	6.66657	CaCO3 Minima(/δ18O Maxima) to E Maxima	Liebrand et al., 2016; rmcd updated in this study
288	208-1264B-23H-4, 114	212.44	234.09	0.74	21.325	111	0.848489	8.48489	CaCO3 Minima(/δ18O Maxima) to E Maxima	Liebrand et al., 2016; rmcd updated in this study
289	208-1264B-23H-5, 48	213.28	234.93	0.84	21.424	98.999	0.869571	8.69571	CaCO3 Minima(/δ18O Maxima) to E Maxima	Liebrand et al., 2016; rmcd updated in this study
290	208-1264B-23H-5, 108	213.88	235.53	0.6	21.493	69	1.04265	10.4265	CaCO3 Minima(/δ18O Maxima) to E Maxima	Liebrand et al., 2016; rmcd updated in this study
291	208-1264A-23H-3, 22	212.02	237.73	2.2	21.704	211	0.700932	7.00932	CaCO3 Minima(/δ18O Maxima) to E Maxima	Liebrand et al., 2016; rmcd updated in this study
292	208-1264A-23H-3, 97	212.77	238.48	0.75	21.811	107.001	0.77779	7.7779	CaCO3 Minima(/δ18O Maxima) to E Maxima	Liebrand et al., 2016; rmcd updated in this study
293	208-1264A-23H-4, 10	213.4	239.11	0.63	21.892	80.999	0.894725	8.94725	CaCO3 Minima(/δ18O Maxima) to E Maxima	Liebrand et al., 2016; rmcd updated in this study
294	208-1264A-23H-4, 78	214.08	239.79	0.68	21.968	76	1.00934	10.0934	CaCO3 Minima(/δ18O Maxima) to E Maxima	Liebrand et al., 2016; rmcd updated in this study
295	208-1264A-23H-5, 36	215.16	240.87	1.08	22.075	107.001	1.08413	10.8413	CaCO3 Minima(/δ18O Maxima) to E Maxima	Liebrand et al., 2016; rmcd updated in this study
296	208-1264A-23H-6, 2	216.32	242.03	1.16	22.182	106.998	1.21427	12.1427	CaCO3 Minima(/δ18O Maxima) to E Maxima	Liebrand et al., 2016; rmcd updated in this study
297	208-1264B-24H-3, 140	220.7	243.05	1.02	22.266	84.002	1.34147	13.4147	CaCO3 Minima(/δ18O Maxima) to E Maxima	Liebrand et al., 2016; rmcd updated in this study
298	208-1264B-24H-4, 100	221.8	244.15	1.1	22.348	81.999	0.954126	9.54126	CaCO3 Minima(/δ18O Maxima) to E Maxima	Liebrand et al., 2016; rmcd updated in this study
299	208-1264B-24H-5, 54	222.84	245.19	1.04	22.457	109.001	0.972974	9.72974	CaCO3 Minima(/δ18O Maxima) to E Maxima	Liebrand et al., 2016; rmcd updated in this study
300	208-1264B-24H-6, 12	223.92	246.27	1.08	22.568	111	0.990198	9.90198	CaCO3 Minima(/δ18O Maxima) to E Maxima	Liebrand et al., 2016; rmcd updated in this study
301	208-1264A-24H-2, 17	219.97	247.28	1.01	22.67	101.999	1.16668	11.6668	CaCO3 Minima(/δ18O Maxima) to E Maxima	Liebrand et al., 2016; rmcd updated in this study
302	208-1264A-24H-2, 108	220.88	248.19	0.91	22.748	77.999	0.938759	9.38759	CaCO3 Minima(/δ18O Maxima) to E Maxima	Liebrand et al., 2016; rmcd updated in this study
303	208-1264A-24H-3, 50	221.8	249.11	0.92	22.846	98.002	1.09259	10.9259	CaCO3 Minima(/δ18O Maxima) to E Maxima	Liebrand et al., 2016; rmcd updated in this study
304	208-1264A-24H-4, 18	222.98	250.29	1.18	22.954	107.999	0.908167	9.08167	CaCO3 Minima(/δ18O Maxima) to E Maxima	Liebrand et al., 2016; rmcd updated in this study
305	208-1264B-25H-1, 102	226.82	251.18	0.89	23.052	98	1.21213	12.1213	CaCO3 Minima(/δ18O Maxima) to E Maxima	Liebrand et al., 2016; rmcd updated in this study
306	208-1264B-25H-2, 32	227.62	251.98	0.8	23.118	66	0.923815	9.23815	CaCO3 Minima(/δ18O Maxima) to E Maxima	Liebrand et al., 2016; rmcd updated in this study
307	208-1264B-25H-3, 76	229.56	253.92	1.94	23.328	209.999	1.62263	16.2263	CaCO3 Minima(/δ18O Maxima) to E Maxima	Liebrand et al., 2016; rmcd updated in this study
308	208-1264B-25H-4, 98	231.28	255.64	1.72	23.434	106.001	1.30867	13.0867	CaCO3 Minima(/δ18O Maxima) to E Maxima	Liebrand et al., 2016; rmcd updated in this study
309	208-1264B-25H-5, 54	232.34	256.7	1.06	23.515	80.999	0.999978	9.99978	CaCO3 Minima(/δ18O Maxima) to E Maxima	Liebrand et al., 2016; rmcd updated in this study
310	208-1264A-25H-1, 106	228.86	257.56	0.86	23.601	86.001	0.851866	8.51866	CaCO3 Minima(/δ18O Maxima) to E Maxima	Liebrand et al., 2016; rmcd updated in this study
311	208-1264A-25H-2, 48	229.78	258.48	0.92	23.709	108	0.741359	7.41359	CaCO3 Minima(/δ18O Maxima) to E Maxima	Liebrand et al., 2016; rmcd updated in this study
312	208-1264A-25H-2, 134	230.64	259.34	0.86	23.825	116.001	1.19999	11.9999	CaCO3 Minima(/δ18O Maxima) to E Maxima	Liebrand et al., 2016; rmcd updated in this study
313	208-1264A-25H-3, 80	231.6	260.3	0.96	23.905	80	1.29579	12.9579	CaCO3 Minima(/δ18O Maxima) to E Maxima	Liebrand et al., 2016; rmcd updated in this study
314			262.14	1.84	24.047	142	1.01753	10.1753	CaCO3 Minima(/δ18O Maxima) to E Maxima	Liebrand et al., 2016; rmcd updated in this study
315	208-1264B-26H-1, 80	236.1	263.3	1.16	24.161	113.998	1.60784	16.0784	CaCO3 Minima(/δ18O Maxima) to E Maxima	Liebrand et al., 2016; rmcd updated in this study
316	208-1264B-26H-2, 94	237.74	264.94	1.64	24.263	102.001	0.729747	7.29747	CaCO3 Minima(/δ18O Maxima) to E Maxima	Liebrand et al., 2016; rmcd updated in this study
317	208-1264B-26H-2, 148	238.28	265.48	0.54	24.337	74	0.795921	7.95921	CaCO3 Minima(/δ18O Maxima) to E Maxima	Liebrand et al., 2016; rmcd updated in this study
318	208-1264B-26H-3, 76	239.06	266.26	0.78	24.435	97.999	1.24768	12.4768	CaCO3 Minima(/δ18O Maxima) to E Maxima	Liebrand et al., 2016; rmcd updated in this study
319	208-1264B-26H-4, 62	240.42	267.62	1.36	24.544	109.002	0.87273	8.7273	CaCO3 Minima(/δ18O Maxima) to E Maxima	Liebrand et al., 2016; rmcd updated in this study
320	208-1264A-26H-1, 54	237.84	268.58	0.96	24.654	109.998	1.1716	11.716	CaCO3 Minima(/δ18O Maxima) to E Maxima	Liebrand et al., 2016; rmcd updated in this study
321	208-1264A-26H-2, 102	239.82	270.56	1.98	24.823	169.001	0.625014	6.25014	CaCO3 Minima(/δ18O Maxima) to E Maxima	Liebrand et al., 2016; rmcd updated in this study
322	208-1264A-26H-3, 22	240.52	271.26	0.7	24.935	111.999	0.74765	7.4765	CaCO3 Minima(/δ18O Maxima) to E Maxima	Liebrand et al., 2016; rmcd updated in this study
323	208-1264A-26H-3, 102	241.32	272.06	0.8	25.042	107.001	0.627914	6.27914	CaCO3 Minima(/δ18O Maxima) to E Maxima	Liebrand et al., 2016; rmcd updated in this study
324	208-1264A-26H-4, 60	242.4	273.14	1.08	25.214	172.001	0.803736	8.03736	CaCO3 Minima(/δ18O Maxima) to E Maxima	Liebrand et al., 2016; rmcd updated in this study
325	208-1264A-26H-4, 146	243.26	274	0.86	25.321	106.998	0.733926	7.33926	CaCO3 Minima(/δ18O Maxima) to E Maxima	Liebrand et al., 2016; rmcd updated in this study
326	208-1264A-26H-5, 76	244.06	274.8	0.8	25.43	109.001	0.774191	7.74191	CaCO3 Minima(/δ18O Maxima) to E Maxima	Liebrand et al., 2016; rmcd updated in this study
327	208-1264B-27H-2, 80	247.1	275.52	0.72	25.523	93.001	0.973709	9.73709	CaCO3 Minima(/δ18O Maxima) to E Maxima	Liebrand et al., 2016; rmcd updated in this study
328	208-1264B-27H-3, 4	247.84	276.26	0.74	25.599	76	0.834947	8.34947	CaCO3 Minima(/δ18O Maxima) to E Maxima	Liebrand et al., 2016; rmcd updated in this study
329	208-1264B-27H-3, 90	248.7	277.12	0.86	25.702	102.999	1.00885	10.0885	CaCO3 Minima(/δ18O Maxima) to E Maxima	Liebrand et al., 2016; rmcd updated in this study
330	208-1264B-27H-4, 54	249.84	278.26	1.14	25.815	113.001	0.794875	7.94875	CaCO3 Minima(/δ18O Maxima) to E Maxima	Liebrand et al., 2016; rmcd updated in this study
331	208-1264B-27H-4, 116	250.46	278.88	0.62	25.893	77.999	0.754074	7.54074	CaCO3 Minima(/δ18O Maxima) to E Maxima	Liebrand et al., 2016; rmcd updated in this study
332	208-1264B-27H-5, 12	250.92	279.34	0.46	25.954	61	1.08697	10.8697	CaCO3 Minima(/δ18O Maxima) to E Maxima	Liebrand et al., 2016; rmcd updated in this study
333	208-1264B-27H-5, 112	251.92	280.34	1	26.046	92	0.909086	9.09086	CaCO3 Minima(/δ18O Maxima) to E Maxima	Liebrand et al., 2016; rmcd updated in this study
334	208-1264B-27H-6, 62	252.92	281.34	1	26.156	110	0.903848	9.03848	CaCO3 Minima(/δ18O Maxima) to E Maxima	Liebrand et al., 2016; rmcd updated in this study
335	208-1264B-27H-7, 6	253.86	282.28	0.94	26.26	104	0.662634	6.62634	CaCO3 Minima(/δ18O Maxima) to E Maxima	Liebrand et al., 2016; rmcd updated in this study
336	208-1264B-27H-7, 61	254.41	282.83	0.55	26.343	83	1.01075	10.1075	CaCO3 Minima(/δ18O Maxima) to E Maxima	Liebrand et al., 2016; rmcd updated in this study
337			283.77	0.94	26.436	93.001	0.790496	7.90496	CaCO3 Minima(/δ18O Maxima) to E Maxima	Liebrand et al., 2016; rmcd updated in this study
338	208-1264B-28H-1, 18	254.48	284.6	0.83	26.541	104.999	0.792457	7.92457	CaCO3 Minima(/δ18O Maxima) to E Maxima	Liebrand et al., 2016; rmcd updated in this study
339	208-1264B-28H-1, 102	255.32	285.44	0.84	26.647	105.999	0.518989	5.18989	CaCO3 Minima(/δ18O Maxima) to E Maxima	Liebrand et al., 2016; rmcd updated in this study
340	208-1264B-28H-2, 34	256.14	286.26	0.82	26.805	158.001	0.728968	7.28968	CaCO3 Minima(/δ18O Maxima) to E Maxima	Liebrand et al., 2016; rmcd updated in this study
341	208-1264B-28H-2, 112	256.92	287.04	0.78	26.912	107.001	0.611116	6.11116	CaCO3 Minima(/δ18O Maxima) to E Maxima	Liebrand et al., 2016; rmcd updated in this study
342	208-1264B-28H-3, 28	257.58	287.7	0.66	27.02	107.999	0.829787	8.29787	CaCO3 Minima(/δ18O Maxima) to E Maxima	Liebrand et al., 2016; rmcd updated in this study
343	208-1264B-28H-3, 106	258.36	288.48	0.78	27.114	94	0.663044	6.63044	CaCO3 Minima(/δ18O Maxima) to E Maxima	Liebrand et al., 2016; rmcd updated in this study
344	208-1264B-28H-4, 78	259.58	289.7	1.22	27.298	184	0.963298	9.63298	CaCO3 Minima(/δ18O Maxima) to E Maxima	Liebrand et al., 2016; rmcd updated in this study
345	208-1264B-28H-5, 33	260.63	290.75	1.05	27.407	109	0.778843	7.78843	CaCO3 Minima(/δ18O Maxima) to E Maxima	Liebrand et al., 2016; rmcd updated in this study
346	208-1264A-28H-2, 80	258.6	291.56	0.81	27.511	104	0.582264	5.82264	CaCO3 Minima(/δ18O Maxima) to E Maxima	Liebrand et al., 2016; rmcd updated in this study
347	208-1264A-28H-2, 126	259.06	292.02	0.46	27.59	79	0.968442	9.68442	CaCO3 Minima(/δ18O Maxima) to E Maxima	Liebrand et al., 2016; rmcd updated in this study
348	208-1264A-28H-3, 68	259.98	292.94	0.92	27.685	94.999	0.8113	8.113	CaCO3 Minima(/δ18O Maxima) to E Maxima	Liebrand et al., 2016; rmcd updated in this study
349	208-1264A-28H-4, 4	260.84	293.8	0.86	27.791	106.001	0.918135	9.18135	CaCO3 Minima(/δ18O Maxima) to E Maxima	Liebrand et al., 2016; rmcd updated in this study
350	208-1264B-29H-1, 62	264.42	295.37	1.57	27.962	171	0.687499	6.87499	CaCO3 Minima(/δ18O Maxima) to E Maxima	Liebrand et al., 2016; rmcd updated in this study
351	208-1264B-29H-1, 128	265.08	296.03	0.66	28.058	96.001	0.935776	9.35776	CaCO3 Minima(/δ18O Maxima) to E Maxima	Liebrand et al., 2016; rmcd updated in this study
352	208-1264B-29H-2, 80	266.1	297.05	1.02	28.167	108.999	0.819066	8.19066	CaCO3 Minima(/δ18O Maxima) to E Maxima	Liebrand et al., 2016; rmcd updated in this study
353	208-1264A-29H-2, 76	263.96	297.91	0.86	28.272	104.999	0.734456	7.34456	CaCO3 Minima(/δ18O Maxima) to E Maxima	Liebrand et al., 2016; rmcd updated in this study
354	208-1264A-29H-3, 56	265.26	299.21	1.3	28.449	177	0.964038	9.64038	CaCO3 Minima(/δ18O Maxima) to E Maxima	Liebrand et al., 2016; rmcd updated in this study
355	208-1264A-29H-5, 24	267.94	301.89	2.68	28.727	278	0.861528	8.61528	CaCO3 Minima(/δ18O Maxima) to E Maxima	Liebrand et al., 2016; rmcd updated in this study
356	208-1264A-29H-5, 80	268.5	302.45	0.56	28.792	65.001	1.03028	10.3028	CaCO3 Minima(/δ18O Maxima) to E Maxima	Liebrand et al., 2016; rmcd updated in this study
357	208-1264A-29H-6, 32	269.52	303.47	1.02	28.891	99.001	1.03883	10.3883	CaCO3 Minima(/δ18O Maxima) to E Maxima	Liebrand et al., 2016; rmcd updated in this study
358			305.61	2.14	29.097	205.999	1.73334	17.3334	CaCO3 Minima(/δ18O Maxima) to E Maxima	Liebrand et al., 2016; rmcd updated in this study
359	208-1264B-30H-1, 106	274.36	306.91	1.3	29.172	75.001	1.01962	10.1962	CaCO3 Minima(/δ18O Maxima) to E Maxima	Liebrand et al., 2016; rmcd updated in this study
360	208-1264B-30H-2, 60	275.4	307.95	1.04	29.274	101.999	1.36936	13.6936	CaCO3 Minima(/δ18O Maxima) to E Maxima	Liebrand et al., 2016; rmcd updated in this study
361	208-1264B-30H-3, 62	276.92	309.47	1.52	29.385	111	0.854543	8.54543	CaCO3 Minima(/δ18O Maxima) to E Maxima	Liebrand et al., 2016; rmcd updated in this study
362	208-1264A-30H-3, 108	275.28	310.41	0.94	29.495	110.001	0.820807	8.20807	CaCO3 Minima(/δ18O Maxima) to E Maxima	Liebrand et al., 2016; rmcd updated in this study
363	208-1264A-30H-4, 100	276.7	311.83	1.42	29.668	172.998	0.92794	9.2794	CaCO3 Minima(/δ18O Maxima) to E Maxima	Liebrand et al., 2016; rmcd updated in this study
364	208-1264A-30H-6, 6	278.76	313.89	2.06	29.89	222	0.716374	7.16374	CaCO3 Minima(/δ18O Maxima) to E Maxima	Liebrand et al., 2016; rmcd updated in this study
365	208-1264A-30H-6, 54	279.24	314.37	0.48	29.957	67.002	1.17895	11.7895	CaCO3 Minima(/δ18O Maxima) to E Maxima	Liebrand et al., 2016; rmcd updated in this study
366	208-1264A-30H-7, 16	280.36	315.49	1.12	30.052	94.999	0.996775	9.96775	CaCO3 Minima(/δ18O Maxima) to E Maxima	Liebrand et al., 2016; rmcd updated in this study
367			318.58	3.09	30.362	310	1.6631	16.631	CaCO3 Minima(/δ18O Maxima) to E Maxima	Liebrand et al., 2016; rmcd updated in this study
368			324.8	6.22	30.736	374	1.6631	16.631	CaCO3 Minima(/δ18O Maxima) to E Maxima	Liebrand et al., 2016; rmcd updated in this study
