# Supplementary material for: Climate, cryosphere and carbon cycle controls on Southeast Atlantic orbital-scale carbonate deposition since the Oligocene (30–0 Ma)
Source: Copernicus journal article supplement (doi:10.5194/cp-17-2091-2021), 2021-10-15
Supplement: Supplementary file [file cp-17-2091-2021-supplement-title-page.pdf › cp-17-2091-2021-supplement-title-page.pdf]

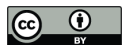

## *Supplement of*

# **Climate, cryosphere and carbon cycle controls on Southeast Atlantic orbital-scale carbonate deposition since the Oligocene (30–0 Ma)**

**Anna Joy Drury et al.**

*Correspondence to:* Anna Joy Drury (ajdrury@marum.de, a.j.drury@ucl.ac.uk)

- cp-17-2091-2021-supplement-title-page.pdf
- Final supplementary information Drury et al 1264 CaCO<sub>3</sub>
  - .DS\_Store
  - Drury et al., Site 1264 CaCO<sub>3</sub> - Supplementary Information.pdf
  - Supplementary Tables S1-S7
    - \* .DS\_Store
    - \* SI Table S1 - Sites 1264-1265 XRF and derived measurement + 1264 uncalibrated XRF data + 1265 CaCO<sub>3</sub>.xlsx
    - \* SI Table S2 - Site 1264 Offsets.xlsx
    - \* SI Table S3 - Site 1264 Splice FINAL.xlsx
    - \* SI Table S4 - Site 1264 Mapping pairs.xlsx
    - \* SI Table S5 - Site 1264-1265 ties.xlsx
    - \* SI Table S6 - Weighted bio-pmag datums.xlsx
    - \* SI Table S7 - Site 1264 astrochronology.xlsx
- \_\_MACOSX
  - .\_Final supplementary information Drury et al 1264 CaCO<sub>3</sub>
  - Final supplementary information Drury et al 1264 CaCO<sub>3</sub>
    - \* .\_DS\_Store
    - \* .\_Drury et al., Site 1264 CaCO<sub>3</sub> - Supplementary Information.pdf
    - \* .\_Supplementary Tables S1-S7
    - \* Supplementary Tables S1-S7

The copyright of individual parts of the supplement might differ from the article licence.
